# Supplementary material for: Protocol for the Northern babies longitudinal study: predicting postpartum depression and improving parent–infant interaction with The Newborn Behavioral Observation
Source: PubMed Central journal article supplement — BMJ Open. 2017 Sep 27;7(9):e016005. doi: 10.1136/bmjopen-2017-016005 (PMC5623488; doi:10.1136/bmjopen-2017-016005), 2017-09-27
Supplement: bmjopen-2017-016005.draft_revisions.pdf [file bmjopen-2017-016005.draft_revisions.pdf]

# BMJ Open

BMJ Open is committed to open peer review. As part of this commitment we make the peer review history of every article we publish publicly available.

When an article is published we post the peer reviewers' comments and the authors' responses online. We also post the versions of the paper that were used during peer review. These are the versions that the peer review comments apply to.

The versions of the paper that follow are the versions that were submitted during the peer review process. They are not the versions of record or the final published versions. They should not be cited or distributed as the published version of this manuscript.

BMJ Open is an open access journal and the full, final, typeset and author-corrected version of record of the manuscript is available on our site with no access controls, subscription charges or pay-per-view fees (<http://bmjopen.bmj.com>).

If you have any questions on BMJ Open's open peer review process please email [editorial.bmjopen@bmj.com](mailto:editorial.bmjopen@bmj.com)

# BMJ Open

## Northern Babies: Predicting postpartum depression and improving parent-infant interaction with The Newborn Behavioral Observation Intervention: A non-randomized cluster controlled design nested in a longitudinal observational study

|                                 |                                                                                                                                                                                                                                                                                                                                                                                                                                                                                                                                                                                                                                                                                                                                                                                                                                                                                                                                                                                                                                                                        |
|---------------------------------|------------------------------------------------------------------------------------------------------------------------------------------------------------------------------------------------------------------------------------------------------------------------------------------------------------------------------------------------------------------------------------------------------------------------------------------------------------------------------------------------------------------------------------------------------------------------------------------------------------------------------------------------------------------------------------------------------------------------------------------------------------------------------------------------------------------------------------------------------------------------------------------------------------------------------------------------------------------------------------------------------------------------------------------------------------------------|
| Journal:                        | <i>BMJ Open</i>                                                                                                                                                                                                                                                                                                                                                                                                                                                                                                                                                                                                                                                                                                                                                                                                                                                                                                                                                                                                                                                        |
| Manuscript ID                   | bmjopen-2017-016005                                                                                                                                                                                                                                                                                                                                                                                                                                                                                                                                                                                                                                                                                                                                                                                                                                                                                                                                                                                                                                                    |
| Article Type:                   | Protocol                                                                                                                                                                                                                                                                                                                                                                                                                                                                                                                                                                                                                                                                                                                                                                                                                                                                                                                                                                                                                                                               |
| Date Submitted by the Author:   | 09-Feb-2017                                                                                                                                                                                                                                                                                                                                                                                                                                                                                                                                                                                                                                                                                                                                                                                                                                                                                                                                                                                                                                                            |
| Complete List of Authors:       | <p>Hoifodt, Ragnhild Sorensen; UiT The Arctic University of Norway, Department of Psychology; University Hospital of North Norway, Division of Mental Health and Addiction</p> <p>Nordahl, Dag; UiT The Arctic University of Norway, Department of Psychology; University Hospital of North Norway, Division of Child and Adolescent Health</p> <p>Pfuhl, Gerit ; UiT The Arctic University of Norway, Department of Psychology; Norwegian University of Science and Technology, Department of Psychology</p> <p>Landsem, Inger Pauline; UiT The Arctic University of Norway, Department of Health and Care Sciences; University Hospital of North Norway, Division of Child and Adolescent Health</p> <p>Thimm, Jens; UiT The Arctic University of Norway, Department of Psychology</p> <p>Ilstad, Linn Kathrin; University Hospital of North Norway, Division of Mental Health and Addiction</p> <p>Wang, Catharina; UiT The Arctic University of Norway, Department of Psychology; University Hospital of North Norway, Division of Child and Adolescent Health</p> |
| <b>Primary Subject Heading</b>: | Mental health                                                                                                                                                                                                                                                                                                                                                                                                                                                                                                                                                                                                                                                                                                                                                                                                                                                                                                                                                                                                                                                          |
| Secondary Subject Heading:      | General practice / Family practice, Mental health, Nursing, Health services research                                                                                                                                                                                                                                                                                                                                                                                                                                                                                                                                                                                                                                                                                                                                                                                                                                                                                                                                                                                   |
| Keywords:                       | Child & adolescent psychiatry < PSYCHIATRY, Depression & mood disorders < PSYCHIATRY, MENTAL HEALTH                                                                                                                                                                                                                                                                                                                                                                                                                                                                                                                                                                                                                                                                                                                                                                                                                                                                                                                                                                    |
|                                 |                                                                                                                                                                                                                                                                                                                                                                                                                                                                                                                                                                                                                                                                                                                                                                                                                                                                                                                                                                                                                                                                        |

SCHOLARONE™  
Manuscripts

1  
2  
3  
4  
5  
6 Title:

7  
8 Northern Babies: Predicting postpartum depression and improving parent-infant interaction  
9  
10 with The Newborn Behavioral Observation Intervention: A non-randomized cluster controlled  
11 design nested in a longitudinal observational study  
12

13  
14  
15  
16 Research protocol of

17  
18  
19  
20  
21 Ragnhild Sørensen Høifødt\*<sup>1,2</sup> Dag Nordahl\*<sup>1,3</sup>,

22  
23 Gerit Pfuhl<sup>1,4</sup>, Inger Pauline Landsem<sup>3,5</sup>, Jens C. Thimm<sup>1</sup>, Linn Kathrin K. Ilstad<sup>2</sup> Catharina  
24 Elisabeth Arfwedson Wang<sup>1,3</sup>

25  
26  
27 \*These authors contributed equally  
28  
29  
30

31  
32 <sup>1</sup>Department of Psychology, Faculty of Health Sciences, UiT The Arctic University of Norway, Tromsø,  
33 Norway

34  
35 <sup>2</sup>Division of Mental Health and Addiction, University Hospital of North Norway, Tromsø, Norway

36  
37 <sup>3</sup>Division of Child and Adolescent Health, University Hospital of Northern Norway, Tromsø, Norway

38  
39 <sup>4</sup>Department of Psychology, Norwegian University of Science and Technology, Trondheim, Norway

40  
41 <sup>5</sup>Department of Health and Care Sciences, Faculty of Health Sciences, UiT The Arctic University of Norway,  
42 Tromsø, Norway  
43  
44  
45

46 Corresponding author:

47  
48 Dag Nordahl, Department of Psychology, Faculty of Health Sciences, UiT Arctic University  
49 of Norway, 9037 Tromsø, Norway. Telephone: +47 77645807, Fax: +47 77645291. E-mail:  
50 dag.nordahl@uit.no.  
51  
52  
53  
54  
55

56  
57  
58 Word count: 3956  
59  
60

## Abstract

### Introduction

Postpartum depression (PPD) is a prevalent disorder. Studying the factors related to PPD will help to identify families at risk and provide preventive interventions. This can in turn improve the developmental trajectories for the children. Several previous studies have investigated risk factors for PPD. However, few studies have focused on cognitive vulnerability factors. The first aim of the present study is to explore a range of protective and risk factors, including cognitive factors, for PPD, parent-infant interactions and child development. The second aim of the study is to evaluate the effectiveness of The Newborn Behavioral Observation (NBO) as a universal preventive intervention delivered in routine practice. The NBO is a brief relationship-enhancing intervention that may reduce depressive symptomatology in mothers.

### Methods

The study is a longitudinal observational study with an intervention. The observational study uses a prospective cohort design, whereas the intervention-study has a non-randomized cluster controlled design comparing a group receiving NBO with a group receiving standard care. The intervention group will receive three NBO-sessions within the first four weeks post-delivery. Between 2015 and 2018 approximately 200 families will be recruited in the municipality of Tromsø, Norway. Parents are recruited during pregnancy, and assessments will be performed during gestational week 16 – 22, 24 – 30 and 31, and at 6 weeks, 4 months and 6 months post-delivery. Predictor variables include several cognitive vulnerability factors including early maladaptive schemas, implicit attitudes and cognitive processing of emotionally valenced infant facial information.

### Ethics and dissemination

The Regional Committee for Medical and Health Research Ethics in Northern Norway has approved the project. The research team has collaboration with local health services, and can assist participants who need more extensive follow-up. Results from the project will be disseminated in international and national peer-reviewed journals, and at courses and conferences.

**Trials registration number:** NCT0253849

### Strengths and limitations of this study

- This study will provide new knowledge about cognitive vulnerability and protective

1  
2  
3 factors associated by postpartum depression, parent-infant interaction, and child  
4 development.

- 5  
6 • This study is the first to examine the effect of Newborn Behavioral Observation  
7 (NBO), a brief and easily delivered relationship enhancing parent-infant intervention,  
8 delivered as a general preventive intervention both for postpartum depression and for  
9 parent-infant interaction difficulties.
- 10  
11 • This study will in addition to the mothers and infants also include fathers.
- 12  
13 • The participants will go through 6 assessments; from gestational week 16-22 until 6  
14 months post delivery.
- 15  
16 • A limitation of the study is that the participants are not randomly assigned to the  
17 intervention and control group, respectively.

18  
19  
20  
21  
22  
23  
24 The transition into parenthood is a period with great biological and psychosocial  
25 changes, and is associated with an elevated risk for depressed mood for both mothers and  
26 fathers (1). The prevalence of postpartum depression (PPD) is between 10 % and 15% for  
27 women (2, 3), and between 5 % and 10 % for men (1, 4-9). However, a meta-analysis  
28 suggested the rate in men may be as high as 25 % in the period between 3- and 6-months  
29 postpartum (9).

30  
31  
32  
33  
34  
35  
36  
37  
38  
39  
40  
41  
42  
43  
44  
45  
46  
47  
48  
49  
50  
51  
52  
53  
54  
55  
56  
57  
58  
59  
60  
Important risk factors for developing maternal PPD include antenatal depression and  
anxiety, previous psychiatric illness, a poor marital relationship, life stressors, a negative  
attitude towards pregnancy and lack of social support (10). Adverse childhood experiences are  
in general considered a risk for depression (11) and stress (12) in adulthood. In addition, an  
insecure adult attachment style is shown to be related to maternal PPD (13). Paternal PPD  
shares many of the same risk factors as maternal PPD (5, 6). However, the most common  
correlate for paternal postpartum depression is having a depressed partner (8, 14). Thus,  
depression in one parent increases the risk for couple comorbidity where both parents become  
depressed.

### **Cognition in PPD**

Parents' ability to cope with and relate to this transitional period can be assessed by  
measuring their cognitive schemas and information processing. Cognition may have an  
important role in the development of maternal PPD and may affect the quality of mother-

09.02.17

1  
2  
3 infant interactions. In fact, cognitive factors such as antenatal self-devaluating tendencies, a  
4 lack of specificity in autobiographical retrieval (15), brooding rumination and negative  
5 inferential styles (16) have been found to be predictive of depressive symptoms eight weeks  
6 after childbirth.  
7  
8

9  
10 Further, depression is characterized by impairments and deviations from normal  
11 functioning across a broad range of cognitive domains, e.g., attention, attitudes, memory (17,  
12 18). For instance, there is support for a depression related bias for processing of facial  
13 information (19-23). Research suggests that mothers with symptoms of PPD judge neutral  
14 infant faces as less neutral (24) and rate negative infant faces more negatively (25) compared  
15 to non-depressed mothers. Also, mothers with PPD may less accurately identify happy infant  
16 faces compared to healthy controls (26), and lower accuracy may be associated with higher  
17 levels of maternal depression (27). Still, research on cognitive biases for facial information in  
18 PPD is limited.  
19  
20

21  
22 The cognitive mechanisms that may mediate the effect of PPD on parenting are not  
23 well understood. Rumination in depressed mothers is associated with difficulties in the  
24 mother-infant relationship, probably because the depressed mother's focus is mostly on  
25 herself and not on the needs of the child (28). Müller et al. (29) also found that maternal  
26 rumination in pregnancy was related to an impaired mother-infant relationship postpartum. In  
27 addition, parents processing of infants facial expression is indicated to have an important role  
28 for attunement, emotional attachment, and emotional regulation (30).  
29  
30  
31  
32  
33  
34  
35  
36  
37  
38  
39

#### 40 **Impact of PPD on parent-infant interaction**

41  
42 Maternal depression interferes with healthy interactions with the infant by reducing  
43 the mother's ability to be sensitively attuned and responsive to her infant's signals and needs  
44 (31-34). Depressed mothers may also show a more negative (hostile and intrusive) and less  
45 responsive parenting style (35). Furthermore, they may touch and talk less with their infant  
46 and may show more negative facial expressions during face-to-face-interaction (36).  
47  
48  
49  
50

51  
52 Studies also indicate that mothers with depression tend to have poorer mentalization  
53 skills (37). Mentalization can be defined as the capacity to understand the behavior of oneself  
54 and others in terms of underlying mental states and intentions (38), whereas reflective  
55 functioning is described as an overt manifestation of the capacity to mentalize (39). Depressed  
56  
57  
58  
59  
60

1  
2  
3 mothers have difficulty reading the affective communication of the infant and responding  
4 appropriately (36). Accordingly, the ability for affect regulation and interactive coordination  
5 is impaired (40, 41). The capacity to mentalize develops through a child's social interaction  
6 with a caregiver who has the ability to understand the child as an individual with a mind (42).  
7 Thus, a parent's own unresolved adverse childhood experiences may both increase the risk of  
8 psychopathology, as well as impact on their own capacity for reflective functioning and  
9 ability to bond (39, 43, 44). Parental reflective functioning is further related to infant  
10 attachment (45). Studies suggest that this may be one important factor in the intergenerational  
11 transmission of attachment patterns (46).  
12  
13  
14  
15  
16  
17  
18  
19  
20

### 21 **Consequences for the child**

22  
23 It is well-documented that maternal depression has an adverse effect on the child's  
24 development (36, 47). Children of depressed mothers are more likely to have cognitive,  
25 behavioural, emotional, and attachment difficulties in childhood (48, 49). Disrupted maternal  
26 affective communication is linked with attachment disorganization (50). Disorganized  
27 attachment is overrepresented in children of depressed mothers (48), and is associated with  
28 internalizing and externalizing behavior problems (51, 52). The risk for adverse outcomes  
29 such as poorer school adjustment, lower peer social competence, and an increased risk for  
30 depression persist into later childhood and adolescence (53-55).  
31  
32  
33  
34  
35  
36

37 Maternal insensitivity can also influence infant stress-related physiology, as shown by  
38 greater activation of the autonomic nervous system (56, 57). Infants of more sensitive mothers  
39 show higher resting heart rate variability (HRV) compared to infants of less sensitive mothers  
40 (57). Heart rate variability is proposed as a marker for stress and health (58). Higher HRV is  
41 associated with more adaptive coping and emotion regulation, and lower HRV is related to  
42 negative outcomes such as depression and anxiety implicating emotional dysregulation (59).  
43  
44  
45  
46  
47

48 Paternal PPD also has important implications. Studies show that even after controlling  
49 for maternal depression, depression in fathers in the pre- and postnatal period is related to  
50 negative social, emotional and behavioral outcomes for the child up to 7 years of age (4, 60-  
51 62). Some studies suggest that postpartum depression in fathers may be especially associated  
52 with an increased risk for oppositional defiant and conduct disorders in boys (4, 60).  
53  
54  
55  
56  
57  
58  
59  
60

## Prevention and Treatment of PPD

PPD in mothers can be conceptualized as a mother-infant relationship disorder (63). Thus, interventions improving parent-infant interactions can potentially improve and prevent maternal PPD, as well as improve the trajectories for the children (64, 65). Such preventive efforts could have important societal implications. A recent report listed the high level of costs associated with maternal perinatal health problems (66), and concludes that even modest improvements in outcomes as a result of better services would benefit society.

One such relationship-enhancing intervention is The Newborn Behavioral Observation (NBO; 67). The NBO is a brief, low-cost intervention that can be used in a range of settings (68). It is compatible with the regular practice of public health nurses in Norway, and has been implemented as standard care in several regions. The goal of NBO is to sensitize parents to their infant's competencies and to how the newborn baby communicates through body signs, movements, state regulation, and responsivity (67). Enhanced understanding of how to "read the baby" can contribute to the development of a positive parent-infant relationship. In addition, results from a pilot study indicated that delivering NBO as a universal preventive intervention may reduce depressive symptomatology (69). By increasing parental sensitivity, the intervention also has the potential to positively affect biomarkers related to infant stress, as indicated by previous studies of attachment-based interventions (70). However, research on the effect of NBO as a preventive intervention is scarce, and there is a need for more studies.

### Aims

The present study has three broad aims:

- 1) *Examine key predictors related to parental functioning:* a) parental postpartum depression, anxiety, and stress, b) parental reflective functioning in relation to the infant, and c) parent-infant attachment style.
- 2) *Examine key predictors related to interaction and developmental problems in the child:* a) difficulties in parent-infant interaction in the first 4 months post-delivery, and b) infant's cognitive, communicative and motor development, signs of sustained withdrawal behaviour, and heart-rate variability at 6 months post-delivery.
- 3) *Evaluate the effectiveness of the NBO as a universal preventive intervention delivered in routine practice as compared to standard care, on:*



- 1  
2  
3 - Parental (depressive symptoms, parenting stress, reflective functioning, attachment  
4 to the infant),  
5  
6  
7 - Relational (emotional availability in parent-child interaction), and  
8  
9  
10 - Infant outcomes (cognitive, communicative and motor development at 6 months  
11 post-delivery, heart-rate variability).  
12

13 Predictor variables include some well-known vulnerability factors for developing PPD  
14 (e.g., depression symptoms in pregnancy, adult attachment style, relationship satisfaction and  
15 life stress), but the main focus in the observational part of the research project is on cognitive  
16 vulnerability factors such as early maladaptive schemas, repetitive negative thinking,  
17 rumination, implicit attitudes and cognitive processing of emotionally valenced infant facial  
18 information.  
19  
20  
21  
22  
23  
24  
25

## 26 **Methods**

### 27 **Study design**

28  
29  
30 This is a longitudinal observational study with an intervention. The observational part  
31 of the study will use a prospective cohort design. The effect of the intervention will be  
32 evaluated using a non-randomized cluster controlled design, since neither cluster nor  
33 individual randomization is feasible in this routine practice setting. An intervention group  
34 receiving NBO (families belonging to two well-baby clinics in Tromsø municipality) will be  
35 compared with a control group (families at the remaining four well-baby clinics in Tromsø)  
36 receiving care as usual.  
37  
38  
39  
40  
41  
42  
43  
44

### 45 **Recruitment**

46  
47 All pregnant women and expecting fathers who speak Norwegian are eligible for  
48 inclusion in the study. Between autumn 2015 and autumn 2018 approximately 200 families  
49 will be recruited by midwives and by general practitioners (GPs) in the municipality of  
50 Tromsø, which is the 9th largest municipality in Norway (~73000 inhabitants; 71). The  
51 participants will be recruited in (approximately) week 16 of gestation. At recruitment, women  
52 will be given written information about the study and a flyer with an inquiry to be contacted  
53 by the research team. The health worker informs the research team who contacts the women  
54  
55  
56  
57  
58  
59  
60

1  
2  
3 to plan a meeting preferable between week 16 and 22 of gestation. In this meeting, the  
4 prospective parents are given detailed information about the study and are invited to sign an  
5 informed consent to participate. In addition, at 4 months post-delivery the parents will be  
6 asked to sign an informed consent to obtain birth related information from the birth record.  
7  
8  
9

### 10 11 12 **Power calculations/statistical analysis**

13  
14  
15 The sample size is calculated on the basis of differences between intervention group  
16 and standard care group on the *Edinburgh Postnatal Depression Scale* (EPDS) maternal  
17 score, the *Parenting Stress Scale* (PSI-PD), the *Reflective Functioning Scale* (PRFQ) and the  
18 *Parent Infant-Attachment Scale* (MPAS) 6 weeks post-delivery. Based on the pilotstudy by  
19 Nugent et al. (69) and some regression to the mean, we expect a small to medium effect size  
20 ( $f^2 = .07$ ). A MANOVA with the four aforementioned outcome variables can detect a  
21 difference between the groups with a power of .80 given a group sizes of  $N = 176$ . With an  
22 estimated dropout of 10 %, a group size of 200 will be recruited. The estimation is based on  
23 an  $\alpha$ -level of .05.  
24  
25  
26  
27  
28  
29  
30  
31  
32

### 33 **Procedure**

34  
35 For the observational part of the study, assessments will be performed at six time  
36 points (see Figure 1): During gestational week 16 – 22 (Step 1), 24 – 30 (Step 2) and 31 (Step  
37 3), and at 6 weeks (Step 4), 4 months (Step 5) and 6 months (Step 6) post-delivery. For the  
38 intervention study, pre-intervention measures will be collected at Step 3, post-intervention  
39 measures at Step 4 and follow-up measures at Step 5 and 6. Since the families will receive the  
40 first NBO already two-days post-delivery, no pre-test assessment can be obtained for the  
41 interaction and infant measures. Hence, analyses of intervention effects will be based on  
42 differences between groups at 4 and 6 months post-delivery controlling for relevant  
43 covariates. The data is collected using online questionnaires, computerized cognitive tests,  
44 video-filmed observations of parent-infant interactions, and a standardised test of the child's  
45 cognitive, communicative and motor development (Bayley Scales of Infant and Toddler  
46 Development; 72).  
47  
48  
49  
50  
51  
52  
53  
54  
55  
56  
57  
58  
59  
60

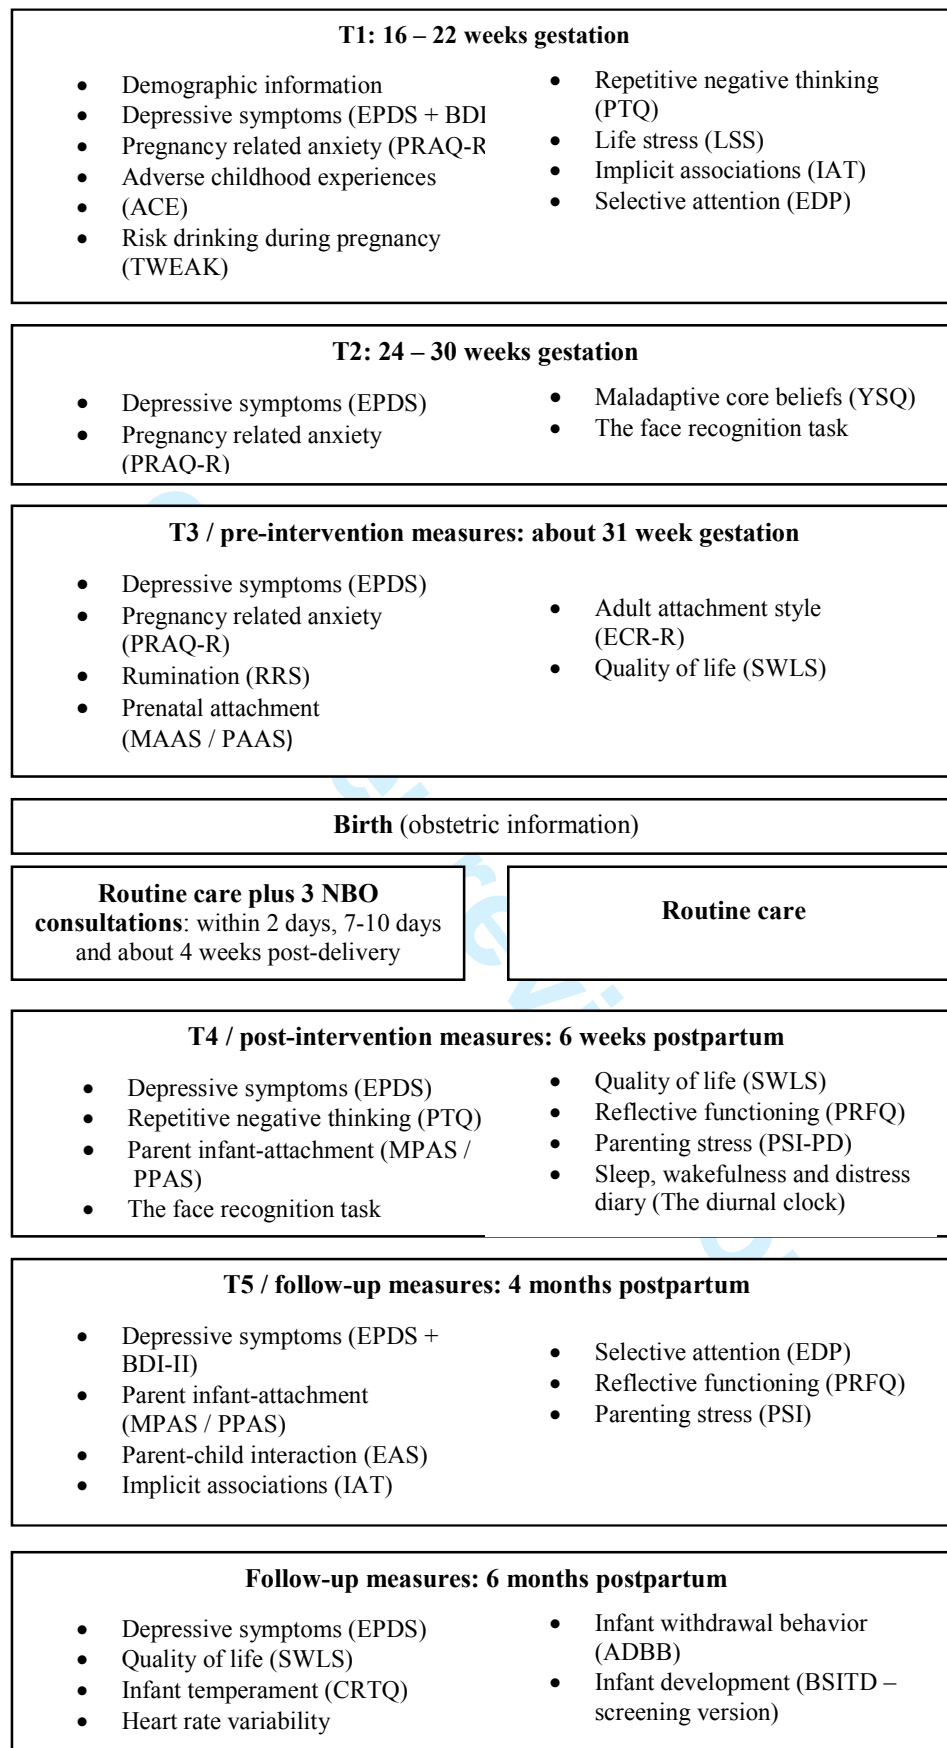

Figure 1. Study protocol and assessments at different time points during the study.

## The intervention

The NBO is designed to strengthen the parent-infant relationship and foster a positive alliance between the family and the health-care provider. It takes 20 to 40 minutes to administer and consists of 18 neurobehavioral observations which give a profile of the infant's behavioural repertoire along the dimensions: attentional-interactional, autonomic, motor and state organization (67). The parents are invited to actively participate in the shared observation of the infant's unique behavioural expressions. Together with the clinician, they can identify techniques for meeting the infant's responses, as well as ventilate feelings and thoughts, and ask questions.

The intervention group will receive three NBO consultations: 1) Routine care plus NBO at the maternity ward in hospital within two days post-delivery; 2) Routine home visit plus the NBO by a public health nurse when the infant is 7-10 days old; and 3) NBO at the well-baby clinic when the infant is 4 weeks old. The intervention will be conducted by midwives at the University Hospital of North Norway (UNN), and public health nurses in Tromsø municipality. Both the midwives and health nurses are certified in using the NBO. The control group will receive care as usual. Between 7 and 10 days after birth a public health nurse routinely visits the family at home to evaluate the baby's weight gain and provide guidance on topics such as feeding, crying, sleeping patterns and handling the baby. The parents can also ask questions and voice concerns. Six weeks after birth, the mother and the infant visit the well-baby clinic. Participants in both groups have equal possibilities to seek out other health care interventions for their own or their baby's health during the project period.

## Instruments

### Predictor variables / independent variables.

***Socio-demographics.*** This includes questions about gender, age, education, marital status, work situation, income, ethnicity, social support, whether pregnancy is wanted, number of pregnancies and children, medication, smoking, and questions about current and previous mental and physical health, as well as help seeking for mental health issues.

***Parental cognition and maladaptive schemas.*** *The Rumination Response Scale* (RRS; 73) is a 22-item self-report measure designed to assess responses to depressed mood that are

1  
2  
3 focused on the self, the symptoms, and on possible causes and consequences. *The*  
4 *Perseverative Thinking Questionnaire* (PTQ; 74) is a 15-item self-report measure developed  
5 as a content independent measure of repetitive negative thinking. *The Young Schema*  
6 *Questionnaire* (YSQ; 75) consists of 90 items measuring maladaptive core beliefs about the  
7 self and others that are rooted in adverse relational experiences in childhood and adolescence.  
8  
9  
10

11 **Parental relationship measures.** *Adverse Childhood Experiences* (ACE; 76) is a 10-  
12 item measure of emotional, physical, and sexual maltreatment and abuse in childhood. *The*  
13 *Experiences in Close Relationships-Revised Questionnaire* (ECR-R; 77) is a 36-item measure  
14 of adult attachment style. The ECR-R includes two attachment subscales: avoidance and  
15 anxiety. *The Maternal Antenatal Attachment Scale* (MAAS; 78) is a 19-item self-report used  
16 to assess maternal antenatal bonding to the foetus. *The Paternal Antenatal Attachment Scale*  
17 (PAAS; 79) is a 16-item self-report measure used to assess paternal behaviours, attitudes and  
18 feelings towards the foetus.  
19  
20  
21  
22  
23  
24

25 **Measures of parental stress and alcohol abuse.** *The Life stress scale* (LSS) is a  
26 subscale of the Parenting Stress Index (PSI; 80) consisting of 19 items measuring stress  
27 factors over the last 12 months. *The Pregnancy-Related Anxiety Questionnaire* (PRAQ-R; 81)  
28 is a 10-item self-report inventory that assesses three subscales of anxiety that are specific to  
29 pregnancy: fear of giving birth, fear of bearing a handicapped child, and pregnancy-related  
30 concerns about one's appearance. *The Tolerance, Worried, Eye-opener, Amnesia, Kut down*  
31 (TWEAK; 82) is a 5-item self-report scale developed to screen for risk drinking during  
32 pregnancy.  
33  
34  
35  
36  
37  
38

39 **Experimental tests.** Parental cognition and a potential depression related negative bias  
40 to infant signals (83) will be measured with a) a face recognition task (84, 85) b) a single  
41 category Implicit Associations Test (86) and c) a modified Emotional Dot-Probe (EDP) Task  
42 (19, 87). The tests will be administered pre- and postpartum. A) *The face recognition task*  
43 measures bias towards memory of facial expressions. Pilot data yielded that patients with  
44 major depression were better in recognizing faces of negative valence than a matched control  
45 group (85). B) *The IAT* is a well-established measure of implicit attitudes towards the tested  
46 categories, e.g., objects or persons (including the self). By associating the category of interest  
47 with positive and negative words, the resulting difference in reaction times sheds light on a  
48 person's attitude. We will use a single-category IAT to investigate attitudes towards infants,  
49 using neutral infant images. C) *The EDP* is a test used to assess selective attention. The  
50 presentation of emotional stimuli interferes with a spatial task to respond as quickly as  
51  
52  
53  
54  
55  
56  
57  
58  
59  
60

possible to the location of a seen target (e.g. a dot or cross). In this exogenous cueing task, emotional infant faces are presented either on the left or right side of the screen. Immediately after a probe is shown. The task is to respond as quickly as possible to the location of the probe. The valence of the stimulus and the mood of the subject biases attention either towards or away from the probe location (88, 89).

### **Outcome measures.**

**Parental measures of depression, stress and quality of life.** *The Edinburgh Postnatal Depression Scale* (EPDS; 90) is a 10-item self-report inventory designed to identify women at risk for postnatal depression. The scale is also validated for use in men (91). Depression severity will be assessed with *the Beck Depression Inventory-II* (92). Depressive symptoms during pregnancy assessed with these scales will also be used as predictor variables. *The Parenting Stress Index* (PSI-FF, third edition; 80) is a parent self-report measure consisting of 120 items. It is designed to identify potentially dysfunctional parent-child systems and parental stress. The PSI yields a total stress score, and scores for two general domains: Child Domain and Parent Domain and the LSS (previously described). Quality of life will be assessed with *the Satisfaction With Life Scale (SWLS)* which is a 5-item scale measuring global life satisfaction according to the individual's own criteria (93). In addition, one item asking participants to rate how happy they feel will be included (94).

**Parent-infant measures.** In order to assess parent-child interaction, we will employ *the Emotional Availability Scale* (Infancy to Early Childhood Version up to 4 years) (EAS; 95). The EAS is rated on the basis of 15-30 minutes videotaped episodes of parent-infant play interaction. *The Parental Reflective Functioning Questionnaire* (PRFQ; 96) is an 18-item self-report questionnaire. It consists of three subscales: pre-mentalizing, certainty in mental states and interest and curiosity in mental states. *The Maternal Postnatal Attachment Scale* (MPAS; 97) and *The Paternal Postnatal Attachment Scale* (PPAS; 98) are 19-item self-report questionnaires for measuring mother- / father-infant attachment.

**Infant measures.** *The Cameron-Rice Temperament Questionnaire* (CRTQ; 99) is a 45-item inventory in which parents are asked to rate their infant's sensitivity, general activity, general intensity, frustration tolerance, adaptability, regularity, and soothability. *The diurnal clock* (DC; 100) is a sleep diary with quantifiable information about sleep, wakefulness and distress over a 24-h period. Prior to the meeting at 6-weeks post-delivery the parents are sent two copies of this registration chart and are instructed to complete them over a 48 h period.

1  
2  
3 *The screening test version of Bayley Scales of Infant and Toddler Development* (BSITD -  
4 Screening version; 72) is a short version of the Bayley-III full-scale version. Bayley is a test  
5 of cognitive, communicative and motor development, widely used for research and clinical  
6 purposes. *The Alarm Distress Baby Scale* (ADBB; 101) is completed based on child behavior  
7 during administration of the Bayley at 6 months. This scale is designed to detect signs of  
8 sustained withdrawal behavior in infants 2–24 months of age.

9  
10  
11  
12  
13 **Biological measures.** Heart rate variability will be measured in parents and infants  
14 during child cognitive testing using wireless unobtrusive electrocardiogram (ECG)-equipment  
15 (102).

16  
17  
18  
19 **Fidelity measure.** After each NBO consultation the interventionist fills out a fidelity  
20 form developed for the current study that indicates which NBO-items were performed, who  
21 participated (mother, father etc.), intervention duration and which themes that were discussed.  
22 The health workers also rate how they performed the intervention, e.g., to which degree they  
23 interpreted the baby's signals together with the parents, validated the parents' observations  
24 and skills, summed up their observations of the baby's strengths and need for support, and  
25 how much they counselled the parents.

### 32 33 34 **Ethical considerations and dissemination**

35  
36 The project follows the standards of the WMA Declaration of Helsinki – Ethical  
37 Principles for Medical Research Involving Human Subjects, and the project has been  
38 approved by the Regional Committee for Medical and Health Research Ethics in Northern  
39 Norway (2015/614). All participants receive both oral and written information about the  
40 project. Parents give informed consent for themselves and their infant's participation.  
41 Participants receive unique IDs, which they use for questionnaires, cognitive tests and  
42 observations. The sheet connecting IDs with names will be securely stored separately from  
43 the data. Only authorized personnel from the project will have access to this sheet. We are  
44 using a university survey system to ensure secure data storage. All investigators will have  
45 access to a data set cleaned of all personal identifiable information. Data sets will be password  
46 protected.

47  
48 During the data collection, it will be emphasized that the participant is free to decline  
49 the researcher's involvement. None of the assessments or interventions involves any health  
50  
51  
52  
53  
54  
55  
56  
57  
58  
59  
60

09.02.17

1  
2  
3 risks. As we cooperate with both primary health care in Tromsø municipality and the  
4 specialist mental health care services and they are well informed about the study, participants  
5 who are in need of more extensive services will be helped to get in touch with the health  
6 services for further treatment.  
7  
8

9  
10 Results from the project will be disseminated in international and national peer-  
11 reviewed journals. The results will also be communicated at courses and conferences. In  
12 addition, results will be disseminated to the public in various media outlets, and study  
13 participants will be informed of the results through the study website: <http://site.uit.no/SIN>  
14  
15  
16  
17

### 18 19 20 **Discussion**

21  
22 PPD is common among mothers and fathers. There is accumulating evidence that PPD  
23 interferes with a healthy interaction between parents and infants, as well as negative  
24 developmental outcomes for the child up to several years later. This study aims to increase the  
25 knowledge of cognitive risk factors for postpartum depression, interaction difficulties with the  
26 child and child development. Such knowledge will be of help in identifying risk families as  
27 early as pregnancy. In addition, we aim to investigate if NBO can be effective in preventing  
28 PPD and parent-infant interaction problems.  
29  
30  
31  
32  
33

34  
35 The main focus of the observation part of the study is to investigate cognitive risk  
36 factors for PPD and parent-infant relationship difficulties. Cognition is a predictor that has  
37 received relatively little attention in this field of research. Several researchers have suggested  
38 that cognitive processing and interpretation of infant signals is central for the parents'  
39 attunement to their child. To explore this assumption we have set up three cognitive tests  
40 using pictures of emotional infant faces to measure parents' attention, memory and implicit  
41 associations towards infants.  
42  
43  
44  
45  
46

47  
48 Furthermore, the study expands on the transgenerational perspective by looking at  
49 parent's own adverse childhood experiences as background and reflective functioning for  
50 their coping with the postpartum period and relating to their infant. Further, we will study  
51 how this influences infant stress-related physiology, as measured with heart rate variability,  
52 which is proposed as a marker for emotion regulation.  
53  
54

55  
56 There is a need for interventions with a potential for preventing PPD and improving  
57 the parent- infant relationship. This may further promote a healthy development of the child.  
58  
59  
60



1  
2  
3 The NBO is a brief intervention that aims to sensitize parents to their infant's competencies.  
4 In the present study, one group of parents will receive three NBO-sessions as a universal  
5 preventive intervention during the first four weeks after birth, while the control group will  
6 receive standard health care. We will examine the NBO's potential positive effects on the  
7 parent-infant relationship, as well as in reducing depressive symptoms in the parents.  
8  
9

10  
11 Finally, although fathers have become more active caregivers for infants in many  
12 societies, they are to a lesser degree included in research in this field compared to women.  
13 Accordingly, we also include fathers to explore their experiences in this period of transition,  
14 and examine factors associated with their relationship with the infant.  
15  
16  
17  
18  
19

### 20 21 **Contributors**

22 Study concept and design: Høifødt, Nordahl, Pfuhl, Landsem, Thimm, Ilstad, and Wang have all contributed  
23 equally to study concept and design. Drafting the manuscript: Høifødt, Nordahl, Pfuhl and Wang. Critical  
24 revision of the manuscript for important intellectual content: Høifødt, Nordahl, Pfuhl, Landsem, Thimm, Ilstad,  
25 and Wang.  
26  
27

28 **Funding** This study is supported by 'The National Program for Integrated Clinical Specialist and PhD-training  
29 for Psychologists' in Norway. This program is a cooperation between the Universities of Bergen, Oslo, Tromsø,  
30 the Norwegian University of Science and Technology (Trondheim), the Regional Health Authorities and the  
31 Norwegian Psychological Association. The program is funded jointly by The Ministry of Education and  
32 Research and The Ministry of Health and Care Services. Also, the Department of Psychology, the Faculty of  
33 Health Sciences, UiT The Arctic University of Norway has funded the post doc and research assistants who help  
34 in the study. Role of the funder/sponsor: The study sponsor had no role in the study concept, design and  
35 implementation of the study; collection, management, preparation, review, or approval of the manuscript, or the  
36 decision to submit the manuscript for publication. Obtained funding: Høifødt, Nordahl, Pfuhl, Thimm, and  
37 Wang.  
38  
39

40 **Competing interests** None declared.

41  
42 **Ethics approval** The project has been approved by the Regional Committee for Medical and Health Research  
43 Ethics in Northern Norway (2015/614).  
44

45 **Data sharing statement** The data will be presented through peer-reviewed journals and conference presentation.  
46  
47  
48  
49

### 50 **References**

- 51  
52 1. Matthey S, Barnett B, Ungerer J, Waters B. Paternal and maternal depressed mood during  
53 the transition to parenthood. *Journal of Affective Disorders*. 2000;60(2):75-85.  
54 2. O'Hara MW, Swain AM. Rates and risk of postpartum depression: A meta-analysis.  
55 *International Review of Psychiatry*. 1996;8(1):37-54.  
56  
57  
58  
59  
60

09.02.17

3. Reck C, Struben K, Backenstrass M, Stefenelli U, Reinig K, Fuchs T, et al. Prevalence, onset and comorbidity of postpartum anxiety and depressive disorders. *Acta Psychiatrica Scandinavica*. 2008;118(6):459-68.
4. Ramchandani P, O'Connor TG, Evans J, Heron J, Murray L, Stein A. The effects of pre- and postnatal depression in fathers: A natural experiment comparing the effects of exposure to depression on offspring. *Journal of Child Psychology and Psychiatry*. 2008;49(10):1069-78.
5. Bergström M. Depressive symptoms in new first-time fathers: Associations with age, sociodemographic characteristics, and antenatal psychological well-being. *Birth*. 2013;40(1):32-8.
6. Demontigny F, Girard ME, Lacharité C, Dubeau D, Devault A. Psychosocial factors associated with paternal postnatal depression. *Journal of Affective Disorders*. 2013;150(1):44-9.
7. Serhan N, Ege E, Ayranci U, Kosgeroglu N. Prevalence of postpartum depression in mothers and fathers and its correlates. *Journal of Clinical Nursing*. 2013;22(1-2):279-84.
8. Ngai FW, Ngu SF. Predictors of maternal and paternal depressive symptoms at postpartum. *Journal of Psychosomatic Research*. 2015;78(2):156-61.
9. Paulson JF, Bazemore SD. Prenatal and postpartum depression in fathers and its association with maternal depression: A meta-analysis. *Journal of the American Medical Association*. 2010;303(19):1961-9.
10. Norhayati MN, Nik Hazlina NH, Asrenee AR, Wan Emilin WM. Magnitude and risk factors for postpartum symptoms: A literature review. *Journal of Affective Disorders*. 2014;175C:34-52.
11. McEwen BS. The neurobiology of stress: From serendipity to clinical relevance. *Brain Research*. 2000;886(1):172-89.
12. Opacka-Juffry J, Mohiyeddini C. Experience of stress in childhood negatively correlates with plasma oxytocin concentration in adult men. *Stress*. 2012;15(1):1-10.
13. Ikeda M, Hayashi M, Kamibeppu K. The relationship between attachment style and postpartum depression. *Attachment & Human development*. 2014;16(6):557-72.
14. Wee KY, Skouteris H, Pier C, Richardson B, Milgrom J. Correlates of ante- and postnatal depression in fathers: A systematic review. *Journal of Affective Disorders*. 2011;130(3):358-77.
15. Hipwell AE, Reynolds S, Pitts Crick E. Cognitive vulnerability to postnatal depressive symptomatology. *Journal of Reproductive and Infant Psychology*. 2004;22(3):211-27.
16. Barnum SE, Woody ML, Gibb BE. Predicting changes in depressive symptoms from pregnancy to postpartum: The role of brooding rumination and negative inferential styles. *Cognitive Therapy and Research*. 2013;37(1):71-7.
17. Gotlib IH, Joormann J. Cognition and depression: Current status and future directions. *Annual Review of Clinical Psychology*. 2010;6:285.
18. Clark DA, Beck AT, Alford BA. Scientific foundations of cognitive theory and therapy of depression. New York, NY: John Wiley & Sons, Inc.; 1999.
19. Joormann J, Gotlib IH. Selective attention to emotional faces following recovery from depression. *Journal of Abnormal Psychology*. 2007;116(1):80.
20. Leppänen JM, Milders M, Bell JS, Terriere E, Hietanen JK. Depression biases the recognition of emotionally neutral faces. *Psychiatry Research*. 2004;128(2):123-33.
21. Leyman L, De Raedt R, Schacht R, Koster EH. Attentional biases for angry faces in unipolar depression. *Psychological Medicine*. 2007;37(03):393-402.
22. Surguladze SA, Young AW, Senior C, Brébion G, Travis MJ, Phillips ML. Recognition accuracy and response bias to happy and sad facial expressions in patients with major depression. *Neuropsychology*. 2004;18(2):212.
23. Joormann J, Gotlib IH. Is this happiness I see? Biases in the identification of emotional facial expressions in depression and social phobia. *Journal of Abnormal Psychology*. 2006;115(4):705.
24. Gil S, Teissèdre F, Chambres P, Droit-Volet S. The evaluation of emotional facial expressions in early postpartum depression mood: A difference between adult and baby faces? *Psychiatry Research*. 2011;186(2-3):281-6.

- 1
- 2
- 3 25. Stein A, Arteche A, Lehtonen A, Craske M, Harvey A, Counsell N, et al. Interpretation of
- 4 infant facial expression in the context of maternal postnatal depression. *Infant Behavior and*
- 5 *Development*. 2010;33(3):273-8.
- 6 26. Arteche A, Joormann J, Harvey A, Craske M, Gotlib IH, Lehtonen A, et al. The effects of
- 7 postnatal maternal depression and anxiety on the processing of infant faces. *Journal of Affective*
- 8 *Disorders*. 2011;133(1):197-203.
- 9 27. Broth MR, Goodman SH, Hall C, Raynor LC. Depressed and well mothers' emotion
- 10 interpretation accuracy and the quality of mother—infant interaction. *Infancy*. 2004;6(1):37-55.
- 11 28. Nolen-Hoeksema S, Wisco BE, Lyubomirsky S. Rethinking rumination. *Perspectives on*
- 12 *Psychological Science*. 2008;3(5):400-24.
- 13 29. Müller D, Teismann T, Havemann B, Michalak J, Seehagen S. Ruminative thinking as a
- 14 predictor of perceived postpartum mother–infant bonding. *Cognitive Therapy and Research*.
- 15 2012;37(1):89-96.
- 16 30. Bistricky SL, Ingram RE, Atchley RA. Facial affect processing and depression
- 17 susceptibility: Cognitive biases and cognitive neuroscience. *Psychological Bulletin*
- 18 2011;137(6):998-1028.
- 19 31. Cummings EM, Davies PT. Maternal depression and child development. *Journal of Child*
- 20 *Psychology and Psychiatry*. 1994;35(1):73-122.
- 21 32. Field T. Maternal depression effects on infants and early interventions. *Preventive*
- 22 *Medicine*. 1998;27(2):200-3.
- 23 33. Goodman SH, Gotlib IH. Risk for psychopathology in the children of depressed mothers: A
- 24 developmental model for understanding mechanisms of transmission. *Psychological Review*.
- 25 1999;106(3):458.
- 26 34. Murray L, Cooper PJ. Effects of postnatal depression on infant development. *Archives of*
- 27 *Disease in Childhood*. 1997;77(2):99-101.
- 28 35. Gelfand DM, Teti DM. The effects of maternal depression on children. *Clinical Psychology*
- 29 *Review*. 1990;10(3):329-53.
- 30 36. Tronick E, Reck C. Infants of depressed mothers. *Harvard Review of Psychiatry*.
- 31 2009;17(2):147-56.
- 32 37. Kingston D, Tough S, Whitfield H. Prenatal and postpartum maternal psychological
- 33 distress and infant development: A systematic review. *Child Psychiatry & Human Development*.
- 34 2012;43(5):683-714.
- 35 38. Fonagy P, Steele M, Steele H, Moran GS, Higgitt AC. The capacity for understanding
- 36 mental states: The reflective self in parent and child and its significance for security of
- 37 attachment. *Infant Mental Health Journal*. 1991(12):201-18.
- 38 39. Slade A. Parental reflective functioning: An introduction. *Attachment & Human*
- 39 *Development*. 2005;7(3):269-81.
- 40 40. Reck C, Hunt A, Fuchs T, Weiss R, Noon A, Moehler E, et al. Interactive regulation of affect
- 41 in postpartum depressed mothers and their infants: An overview. *Psychopathology*.
- 42 2004;37(6):272-80.
- 43 41. Reck C, Noe D, Stefenelli U, Fuchs T, Cenciotti F, Stehle E, et al. Interactive coordination of
- 44 currently depressed inpatient mothers and their infants during the postpartum period. *Infant*
- 45 *Mental Health Journal*. 2011;32(5):542-62.
- 46 42. Fonagy P, Target M. Bridging the transmission gap: An end to an important mystery of
- 47 attachment research? *Attachment & Human Development*. 2005;7(3):333-43.
- 48 43. Fonagy P, Gergely G, Jurist E, Target M. *Affect regulation, mentalization, and the*
- 49 *development of the self*. New York: Other Press; 2002.
- 50 44. Muzik M, Bocknek EL, Broderick A, Richardson P, Rosenblum KL, Thelen K, et al. Mother–
- 51 infant bonding impairment across the first 6 months postpartum: The primacy of
- 52 psychopathology in women with childhood abuse and neglect histories. *Archives of Women's*
- 53 *Mental Health*. 2013;16(1):29-38.
- 54 45. Fonagy P, Luyten P, Moulton-Perkins A, Lee Y-W, Warren F, Howard S, et al. Development
- 55 and validation of a self-report measure of mentalizing: The Reflective Functioning
- 56 Questionnaire. *PLoS One*. 2016;11(7):e0158678.
- 57
- 58
- 59
- 60

09.02.17

- 1
- 2
- 3 46. Slade A, Grienberger J, Bernbach E, Levy D, Locker A. Maternal reflective functioning, attachment, and the transmission gap: A preliminary study. *Attachment & Human Development*. 2005;7(3):283-98.
- 4
- 5
- 6 47. Beardslee W, Versage E, Gladstone T. Children of affectively ill parents: A review of the past 10 years. *Journal of the American Academy of Child and Adolescent Psychiatry*. 1998;37(11):1134-41.
- 7
- 8
- 9 48. Martins C, Gaffan EA. Effects of early maternal depression on patterns of infant-mother attachment: A meta-analytic investigation. *Journal of Child Psychology and Psychiatry*. 2000;41(06):737-46.
- 10
- 11
- 12 49. Murray L. The impact of postnatal depression on infant development. *Journal of Child Psychology and Psychiatry*. 1992;33(3):543-61.
- 13
- 14 50. Kelly K, Slade A, Grienberger JF. Maternal reflective functioning, mother-infant affective communication, and infant attachment: Exploring the link between mental states and observed caregiving behavior in the intergenerational transmission of attachment. *Attachment & Human Development*. 2005;7(3):299-311.
- 15
- 16
- 17 51. Groh AM, Roisman GI, van Ijzendoorn MH, Bakermans-Kranenburg MJ, Fearon RP. The significance of insecure and disorganized attachment for children's internalizing symptoms: A meta-analytic study. *Child Development*. 2012;83(2):591-610.
- 18
- 19
- 20 52. van Ijzendoorn MH, Schuengel C, Bakermans-Kranenburg MJ. Disorganized attachment in early childhood: Meta-analysis of precursors, concomitants, and sequelae. *Development and Psychopathology*. 1999;11(02):225-50.
- 21
- 22
- 23 53. Hay DF, Pawlby S, Angold A, Harold GT, Sharp D. Pathways to violence in the children of mothers who were depressed postpartum. *Developmental Psychology*. 2003;39(6):1083-94.
- 24
- 25
- 26 54. Kersten-Alvarez L, Hosman CH, Riksen-Walraven JM, van Doesum KM, Smeekens S, Hoefnagels C. Early school outcomes for children of postpartum depressed mothers: Comparison with a community sample. *Child Psychiatry & Human Development*. 2012;43(2):201-18.
- 27
- 28
- 29 55. Murray L, Arteche A, Fearon P, Halligan S, Goodyer I, Cooper P. Maternal postnatal depression and the development of depression in offspring up to 16 years of age. *Journal of the American Academy of Child & Adolescent Psychiatry*. 2011;50(5):460-70.
- 30
- 31
- 32 56. Bosquet Enlow M, King L, Schreier HMC, Howard JM, Rosenfield D, Ritz T, et al. Maternal sensitivity and infant autonomic and endocrine stress responses. *Early Human Development*. 2014;90(7):377-85.
- 33
- 34
- 35 57. Kaplan LA, Evans L, Monk C. Effects of mothers' prenatal psychiatric status and postnatal caregiving on infant biobehavioral regulation: Can prenatal programming be modified? *Early Human Development*. 2008;84(4):249-56.
- 36
- 37
- 38 58. Thayer JF, Åhs F, Fredrikson M, Sollers Iii JJ, Wager TD. A meta-analysis of heart rate variability and neuroimaging studies: Implications for heart rate variability as a marker of stress and health. *Neuroscience & Biobehavioral Reviews*. 2012;36(2):747-56.
- 39
- 40
- 41 59. Appelhans BM, Luecken LJ. Heart rate variability as an index of regulated emotional responding. *Review of General Psychology*. 2006;10(3):229-40.
- 42
- 43
- 44 60. Ramchandani P, Stein A, Evans J, O'Connor TG. Paternal depression in the postnatal period and child development: A prospective population study. *The Lancet*. 2005;365(9478):2201-5.
- 45
- 46
- 47 61. Hanington L, Heron J, Stein A, Ramchandani P. Parental depression and child outcomes: Is marital conflict the missing link? *Child: Care, Health and Development*. 2012;38(4):520-9.
- 48
- 49
- 50 62. Fletcher RJ, Feeman E, Garfield C, Vimpani G. The effects of early paternal depression on children's development. *The Medical Journal of Australia*. 2011;195(11-12):685-9.
- 51
- 52 63. Cramer B. Are postpartum depressions a mother-infant relationship disorder? *Infant Mental Health Journal*. 1993;14(4):283-97.
- 53
- 54 64. Nylen KJ, Moran TE, Franklin CL, O'Hara MW. Maternal depression: A review of relevant treatment approaches for mothers and infants. *Infant Mental Health Journal*. 2006;27(4):327-43.
- 55
- 56 65. Paris R, Bolton RE, Spielman E. Evaluating a home-based dyadic intervention: Changes in postpartum depression, maternal perceptions, and mother-infant interactions. *Infant Mental Health Journal*. 2011;32(3):319-38.
- 57
- 58
- 59
- 60

- 1  
2  
3 66. Bauer A, Parsonage M, Knapp M, Iemmi V, Adelaja B. Costs of perinatal mental health  
4 problems. London, UK: London School of Economics and Political Science; 2014.
- 5 67. Nugent JK, Keefer CH, Minear S, Johnson LC, Blanchard Y. Understanding newborn  
6 behavior & early relationships: The Newborn Behavioral Observations (NBO) system handbook:  
7 Brookes Pub; 2007.
- 8 68. Sanders LW, Buckner EB. The Newborn Behavioral Observations System as a nursing  
9 intervention to enhance engagement in first-time mothers: Feasibility and desirability. *Pediatric*  
10 *Nursing*. 2006;32(5):455.
- 11 69. Nugent JK, Bartlett JD, Valim C. Effects of an infant-focused relationship-based hospital  
12 and home visiting intervention on reducing symptoms of postpartum maternal depression: A  
13 pilot study. *Infants & Young Children*. 2014;27(4):292-304.
- 14 70. Nicolson S, Judd F, Thomson-Salo F, Mitchell S. Supporting the adolescent mother-infant  
15 relationship: Preliminary trial of a brief perinatal attachment intervention. *Archives of Women's*  
16 *Mental Health*. 2013;16(6):511-20.
- 17 71. Statistics Norway. Population and population changes, 1 January 2016: Estimated figures  
18 2016 [Available from: [https://www.ssb.no/en/befolkning/statistikker/folkemengde/aar-](https://www.ssb.no/en/befolkning/statistikker/folkemengde/aar-berekna/2015-12-17)  
19 [berekna/2015-12-17](https://www.ssb.no/en/befolkning/statistikker/folkemengde/aar-berekna/2015-12-17)].
- 20 72. Bayley N. The screening test version of Bayley Scales of Infant and Toddler Development.  
21 3rd ed. San Antonio: Harcourt Assessment; 2006.
- 22 73. Nolen-Hoeksema S, Morrow J. A prospective study of depression and posttraumatic  
23 stress symptoms after a natural disaster: The 1989 Ioma prieta earthquake. *Journal of*  
24 *Personality and Social Psychology*. 1991;61:115-21.
- 25 74. Ehring T, Zetsche U, Weidacker K, Wahl K, Schönfeld S, Ehlers A. The Perseverative  
26 Thinking Questionnaire (PTQ): Validation of a content-independent measure of repetitive  
27 negative thinking. *Journal of Behavior Therapy and Experimental Psychiatry*. 2011;42(2):225-  
28 32.
- 29 75. Young J. Young Schema Questionnaire-S3. Cognitive Therapy Center of New York. 2005.
- 30 76. Felitti VJ, Anda RF, Nordenberg D, Williamson DF, Spitz AM, Edwards V, et al.  
31 Relationship of childhood abuse and household dysfunction to many of the leading causes of  
32 death in adults: The Adverse Childhood Experiences (ACE) Study. *American Journal of*  
33 *Preventive Medicine*. 1998;14(4):245-58.
- 34 77. Fraley RC, Waller NG, Brennan KA. An item response theory analysis of self-report  
35 measures of adult attachment. *Journal of Personality and Social Psychology*. 2000;78(2):350.
- 36 78. Condon JT. The assessment of antenatal emotional attachment: Development of a  
37 questionnaire instrument. *British Journal of Medical Psychology*. 1993;66(2):167-83.
- 38 79. Condon JT. The parental-foetal relationship: A comparison of male and female expectant  
39 parents. *Journal of Psychosomatic Obstetrics & Gynecology*. 1985;4(4):271-84.
- 40 80. Abidin RR. Parenting Stress Index (PSI): Pediatric Psychology Press; 1990.
- 41 81. Huizink AC, Mulder EJ, de Medina PGR, Visser GH, Buitelaar JK. Is pregnancy anxiety a  
42 distinctive syndrome? *Early human development*. 2004;79(2):81-91.
- 43 82. Russel M. New assessment tools for drinking in pregnancy: T-ACE, TWEAK, and others.  
44 *Alcohol Health and Research World*. 1994;18(1):55-61.
- 45 83. Webb R, Ayers S. Cognitive biases in processing infant emotion by women with  
46 depression, anxiety and post-traumatic stress disorder in pregnancy or after birth: A systematic  
47 review. *Cognition and Emotion*. 2014:1-17.
- 48 84. Rhodes MG, Anastasi JS. The own-age bias in face recognition: A meta-analytic and  
49 theoretical review. *Psychological Bulletin*. 2012;138(1):146-74.
- 50 85. Bohne A, Nordahl D, Lindahl ÅAW, Ulvenes P, Wang CEA, Pfuhl G. Is attention and  
51 memory towards infants preserved in patients with major depression? In prep.
- 52 86. Greenwald AG, McGhee DE, Schwartz JL. Measuring individual differences in implicit  
53 cognition: The implicit association test. *Journal of Personality and Social Psychology*.  
54 1998;74(6):1464.
- 55  
56  
57  
58  
59  
60

09.02.17

- 1
- 2
- 3 87. Gotlib IH, Kasch KL, Traill S, Joormann J, Arnow BA, Johnson SL. Coherence and
- 4 specificity of information-processing biases in depression and social phobia. *Journal of*
- 5 *Abnormal Psychology*. 2004;113(3):386.
- 6 88. Clasen PC, Wells TT, Ellis AJ, Beevers CG. Attentional biases and the persistence of sad
- 7 mood in major depressive disorder. *Journal of Abnormal Psychology*. 2013;122(1):74-85.
- 8 89. Koster EHW, De Raedt R, Goeleven E, Franck E, Crombez G. Mood-congruent attentional
- 9 bias in dysphoria: Maintained attention to and impaired disengagement from negative
- 10 information. *Emotion*. 2005;5(4):446-55.
- 11 90. Cox JL, Holden JM, Sagovsky R. Detection of postnatal depression: Development of the 10-
- 12 item Edinburgh Postnatal Depression Scale. *The British Journal of Psychiatry*. 1987;150(6):782-
- 13 6.
- 14 91. Matthey S, Barnett B, Kavanagh DJ, Howie P. Validation of the Edinburgh Postnatal
- 15 Depression Scale for men, and comparison of item endorsement with their partners. *Journal of*
- 16 *Affective Disorders*. 2001;64(2-3):175-84.
- 17 92. Beck AT, Steer RA, Brown GK. BDI-II, Beck Depression Inventory: Manual. San Antonio,
- 18 TX: The Psychological Corporation; 1996.
- 19 93. Diener E, Emmons RA, Larsen RJ, Griffin S. The Satisfaction With Life Scale. *Journal of*
- 20 *Personality Assessment*. 1985;49:71-5.
- 21 94. European Social Survey. European Social Survey: Source questionnaire amendment 03
- 22 2008 [Available from: [http://surveysnet.ac.uk/index/\\_search1099/Ess/4732\\_2008-](http://surveysnet.ac.uk/index/_search1099/Ess/4732_2008-2009_quest_capi_papi_face_main.pdf#search=%22%22taking%20all%20t)
- 23 [2009\\_quest\\_capi\\_papi\\_face\\_main.pdf#search=%22%22taking%20all%20t](http://surveysnet.ac.uk/index/_search1099/Ess/4732_2008-2009_quest_capi_papi_face_main.pdf#search=%22%22taking%20all%20t).
- 24 95. Biringen Z, Derscheid D, Vliegen N, Closson L, Easterbrooks MA. Emotional availability
- 25 (EA): Theoretical background, empirical research using the EA Scales, and clinical applications.
- 26 *Developmental Review*. 2014;34(2):114-67.
- 27 96. Luyten P, Mayes L, Nijssens L. The Parental Reflective Functioning Questionnaire:
- 28 Development, validation, and clinical application. *Infant Mental Health Journal*. 2011;31(3):109-.
- 29 97. Condon JT, Corkindale CJ. The assessment of parent-to-infant attachment: Development
- 30 of a self-report questionnaire instrument. *Journal of Reproductive and Infant Psychology*.
- 31 1998;16(1):57-76.
- 32 98. Condon JT, Corkindale CJ, Boyce P. Assessment of postnatal paternal–infant attachment:
- 33 Development of a questionnaire instrument. *Journal of Reproductive and Infant Psychology*.
- 34 2008;26(3):195-210.
- 35 99. Cameron JR, Rice DC. Developing anticipatory guidance programs based on early
- 36 assessment of infant temperament: 2 tests of a prevention model. *Journal of Pediatric*
- 37 *Psychology*. 1986;11:221-34.
- 38 100. Sarfi M, Martinsen H, Bakstad B, Røislien J, Waal H. Patterns in sleep–wakefulness in
- 39 three-month old infants exposed to methadone or buprenorphine. *Early Human Development*.
- 40 2009;85(12):773-8.
- 41 101. Guedeney A, Fermanian J. A validity and reliability study of assessment and screening for
- 42 sustained withdrawal reaction in infancy: The Alarm Distress Baby scale. *Infant Mental Health*
- 43 *Journal*. 2001;22(5):559-75.
- 44 102. Biopac Systems Inc. CA, USA 2015.
- 45
- 46
- 47
- 48
- 49
- 50
- 51
- 52
- 53
- 54
- 55
- 56
- 57
- 58
- 59
- 60

1  
2  
3  
4  
5  
6  
7  
8  
9  
10  
11  
12  
13  
14  
15  
16  
17  
18  
19  
20  
21  
22  
23  
24  
25  
26  
27  
28  
29  
30  
31  
32  
33  
34  
35  
36  
37  
38  
39  
40  
41  
42  
43  
44  
45  
46  
47  
48  
49  
50  
51  
52  
53  
54  
55  
56  
57  
58  
59  
60

Contributor statement

Høifødt, R. S., Nordahl, D., Pfuhl, G., Landsem, I. P., Thimm, J., Ilstad, L. K. K., and Wang, C. E. A have all contributed to study concept and design.

Drafting the manuscript were done by Høifødt, R. S., Nordahl, D., Pfuhl, G., and Wang, C. E. A.

Høifødt, R. S., Nordahl, D., Pfuhl, G., Landsem, I. P., Thimm, J., Ilstad, L. K. K., and Wang, C. E. A., have all critically revised the manuscript for important intellectual content.

For peer review only

1  
2  
3 Reporting guidelines  
4  
5

6 Dear editor,  
7

8 since our manuscript presents both an observation study and an intervention study we  
9 found no reporting guidelines that satisfy both studies. Therefore we have tried to use  
10 both the SPIRIT guideline and the STROBE guideline.  
11  
12  
13  
14  
15  
16  
17  
18  
19  
20  
21  
22  
23  
24  
25  
26  
27  
28  
29  
30  
31  
32  
33  
34  
35  
36  
37  
38  
39  
40  
41  
42  
43  
44  
45  
46  
47  
48  
49  
50  
51  
52  
53  
54  
55  
56  
57  
58  
59  
60



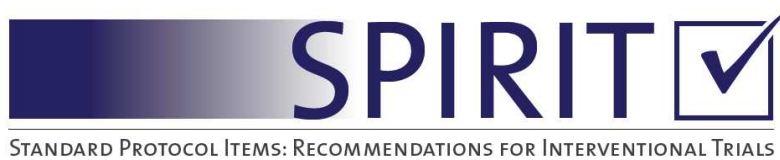

SPIRIT 2013 Checklist: Recommended items to address in a clinical trial protocol and related documents\*

| Section/item                      | Item No | Description                                                                                                  |
|-----------------------------------|---------|--------------------------------------------------------------------------------------------------------------|
| <b>Administrative information</b> |         |                                                                                                              |
| Title                             | 1       | Descriptive title identifying the study design, population, interventions, and, if applicable, trial acronym |
|                                   |         | - Information about study population is missing from the title                                               |
| Trial registration                | 2a      | Trial identifier and registry name. If not yet registered, name of intended registry.                        |
|                                   |         | - Page 2 in the manuscript                                                                                   |
|                                   | 2b      | All items from the World Health Organization Trial Registration Data Set                                     |
| Protocol version                  | 3       | Date and version identifier                                                                                  |
|                                   |         | - date found in header, version identifier is missing.                                                       |
| Funding                           | 4       | Sources and types of financial, material, and other support                                                  |
|                                   |         | - Page 15 in the manuscript                                                                                  |
| Roles and responsibilities        | 5a      | Names, affiliations, and roles of protocol contributors                                                      |
|                                   |         | - Page 15 in the manuscript                                                                                  |
|                                   | 5b      | Name and contact information for the trial sponsor                                                           |
|                                   |         | - Page 15 in the manuscript.                                                                                 |

1  
2  
3  
4  
5  
6  
7  
8  
9  
10  
11  
12  
13  
14  
15  
16  
17  
18  
19  
20  
21  
22  
23  
24  
25  
26  
27  
28  
29  
30  
31  
32  
33  
34  
35  
36  
37  
38  
39  
40  
41  
42  
43  
44  
45  
46  
47  
48  
49  
50  
51  
52  
53  
54  
55  
56  
57  
58  
59  
60

5c Role of study sponsor and funders, if any, in study design; collection, management, analysis, and interpretation of data; writing of the report; and the decision to submit the report for publication, including whether they will have ultimate authority over any of these activities

- The study sponsor had no role in the study concept, design and implementation of the study; collection, management, preparation, review, or approval of the manuscript, or the decision to submit the manuscript for publication.

5d Composition, roles, and responsibilities of the coordinating centre, steering committee, endpoint adjudication committee, data management team, and other individuals or groups overseeing the trial, if applicable (see Item 21a for data monitoring committee)

- not relevant

## Introduction

Background and rationale 6a Description of research question and justification for undertaking the trial, including summary of relevant studies (published and unpublished) examining benefits and harms for each intervention

- Page 3 to 7 in the manuscript

6b Explanation for choice of comparators

- Missing in the manuscript

Objectives 7 Specific objectives or hypotheses

- Page 6 and 7 in the manuscript

Trial design 8 Description of trial design including type of trial (eg, parallel group, crossover, factorial, single group), allocation ratio, and framework (eg, superiority, equivalence, noninferiority, exploratory)

- Page 7 in the manuscript

## Methods: Participants, interventions, and outcomes

|    |                      |    |                                                                                                                                                                                              |
|----|----------------------|----|----------------------------------------------------------------------------------------------------------------------------------------------------------------------------------------------|
| 1  |                      |    |                                                                                                                                                                                              |
| 2  |                      |    |                                                                                                                                                                                              |
| 3  |                      |    |                                                                                                                                                                                              |
| 4  |                      |    |                                                                                                                                                                                              |
| 5  |                      |    |                                                                                                                                                                                              |
| 6  |                      |    |                                                                                                                                                                                              |
| 7  |                      |    |                                                                                                                                                                                              |
| 8  |                      |    |                                                                                                                                                                                              |
| 9  |                      |    |                                                                                                                                                                                              |
| 10 |                      |    |                                                                                                                                                                                              |
| 11 | Study setting        | 9  | Description of study settings (eg, community clinic, academic hospital) and list of countries where data will be collected. Reference to where list of study sites can be obtained           |
| 12 |                      |    |                                                                                                                                                                                              |
| 13 |                      |    |                                                                                                                                                                                              |
| 14 |                      |    |                                                                                                                                                                                              |
| 15 |                      |    |                                                                                                                                                                                              |
| 16 |                      |    | - Page 7 to 10 in the manuscript. Reference to where a list of study sites can be obtained is missing.                                                                                       |
| 17 |                      |    |                                                                                                                                                                                              |
| 18 | Eligibility criteria | 10 | Inclusion and exclusion criteria for participants. If applicable, eligibility criteria for study centres and individuals who will perform the interventions (eg, surgeons, psychotherapists) |
| 19 |                      |    |                                                                                                                                                                                              |
| 20 |                      |    |                                                                                                                                                                                              |
| 21 |                      |    |                                                                                                                                                                                              |
| 22 |                      |    |                                                                                                                                                                                              |
| 23 |                      |    |                                                                                                                                                                                              |
| 24 |                      |    |                                                                                                                                                                                              |
| 25 |                      |    |                                                                                                                                                                                              |
| 26 |                      |    |                                                                                                                                                                                              |
| 27 |                      |    |                                                                                                                                                                                              |
| 28 |                      |    |                                                                                                                                                                                              |
| 29 |                      |    |                                                                                                                                                                                              |
| 30 |                      |    |                                                                                                                                                                                              |
| 31 |                      |    |                                                                                                                                                                                              |
| 32 |                      |    |                                                                                                                                                                                              |
| 33 |                      |    |                                                                                                                                                                                              |
| 34 |                      |    |                                                                                                                                                                                              |
| 35 |                      |    |                                                                                                                                                                                              |
| 36 |                      |    |                                                                                                                                                                                              |
| 37 |                      |    |                                                                                                                                                                                              |
| 38 |                      |    |                                                                                                                                                                                              |
| 39 |                      |    |                                                                                                                                                                                              |
| 40 |                      |    |                                                                                                                                                                                              |
| 41 |                      |    |                                                                                                                                                                                              |
| 42 |                      |    |                                                                                                                                                                                              |
| 43 |                      |    |                                                                                                                                                                                              |
| 44 |                      |    |                                                                                                                                                                                              |
| 45 |                      |    |                                                                                                                                                                                              |
| 46 |                      |    |                                                                                                                                                                                              |
| 47 |                      |    |                                                                                                                                                                                              |
| 48 |                      |    |                                                                                                                                                                                              |
| 49 |                      |    |                                                                                                                                                                                              |
| 50 |                      |    |                                                                                                                                                                                              |
| 51 |                      |    |                                                                                                                                                                                              |
| 52 |                      |    |                                                                                                                                                                                              |
| 53 |                      |    |                                                                                                                                                                                              |
| 54 |                      |    |                                                                                                                                                                                              |
| 55 |                      |    |                                                                                                                                                                                              |
| 56 |                      |    |                                                                                                                                                                                              |
| 57 |                      |    |                                                                                                                                                                                              |
| 58 |                      |    |                                                                                                                                                                                              |
| 59 |                      |    |                                                                                                                                                                                              |
| 60 |                      |    |                                                                                                                                                                                              |

|    |             |    |                                                                      |
|----|-------------|----|----------------------------------------------------------------------|
| 1  |             |    |                                                                      |
| 2  | Participant | 13 | Time schedule of enrolment, interventions (including any run-ins and |
| 3  | timeline    |    | washouts), assessments, and visits for participants. A schematic     |
| 4  |             |    | diagram is highly recommended (see Figure)                           |
| 5  |             |    |                                                                      |
| 6  |             |    | - time schedule of enrolment presented on page 7. A figure for       |
| 7  |             |    | assessments at different time points is found on page 9.             |
| 8  |             |    |                                                                      |
| 9  | Sample size | 14 | Estimated number of participants needed to achieve study objectives  |
| 10 |             |    | and how it was determined, including clinical and statistical        |
| 11 |             |    | assumptions supporting any sample size calculations                  |
| 12 |             |    |                                                                      |
| 13 |             |    | - see page 8 for power calculations.                                 |
| 14 |             |    |                                                                      |
| 15 | Recruitment | 15 | Strategies for achieving adequate participant enrolment to reach     |
| 16 |             |    | target sample size                                                   |
| 17 |             |    |                                                                      |
| 18 |             |    | - Yes, see page 7 in the manuscript.                                 |
| 19 |             |    |                                                                      |
| 20 |             |    |                                                                      |
| 21 |             |    |                                                                      |

### Methods: Assignment of interventions (for controlled trials)

#### Allocation:

|    |                |     |                                                                         |
|----|----------------|-----|-------------------------------------------------------------------------|
| 25 |                |     |                                                                         |
| 26 | Sequence       | 16a | Method of generating the allocation sequence (eg, computer-             |
| 27 | generation     |     | generated random numbers), and list of any factors for stratification.  |
| 28 |                |     | To reduce predictability of a random sequence, details of any planned   |
| 29 |                |     | restriction (eg, blocking) should be provided in a separate document    |
| 30 |                |     | that is unavailable to those who enrol participants or assign           |
| 31 |                |     | interventions                                                           |
| 32 |                |     |                                                                         |
| 33 |                |     | - not relevant                                                          |
| 34 |                |     |                                                                         |
| 35 |                |     |                                                                         |
| 36 | Allocation     | 16b | Mechanism of implementing the allocation sequence (eg, central          |
| 37 | concealment    |     | telephone; sequentially numbered, opaque, sealed envelopes),            |
| 38 | mechanism      |     | describing any steps to conceal the sequence until interventions are    |
| 39 |                |     | assigned                                                                |
| 40 |                |     |                                                                         |
| 41 |                |     | - not relevant                                                          |
| 42 |                |     |                                                                         |
| 43 |                |     |                                                                         |
| 44 | Implementation | 16c | Who will generate the allocation sequence, who will enrol participants, |
| 45 |                |     | and who will assign participants to interventions                       |
| 46 |                |     |                                                                         |
| 47 |                |     | - not relevant                                                          |
| 48 |                |     |                                                                         |
| 49 | Blinding       | 17a | Who will be blinded after assignment to interventions (eg, trial        |
| 50 | (masking)      |     | participants, care providers, outcome assessors, data analysts), and    |
| 51 |                |     | how                                                                     |
| 52 |                |     |                                                                         |
| 53 |                |     | - not relevant                                                          |
| 54 |                |     |                                                                         |
| 55 |                |     |                                                                         |
| 56 |                |     |                                                                         |
| 57 |                |     |                                                                         |
| 58 |                |     |                                                                         |
| 59 |                |     |                                                                         |
| 60 |                |     |                                                                         |

1  
2  
3  
4  
5  
6  
7  
8  
9  
10  
11  
12  
13  
14  
15  
16  
17  
18  
19  
20  
21  
22  
23  
24  
25  
26  
27  
28  
29  
30  
31  
32  
33  
34  
35  
36  
37  
38  
39  
40  
41  
42  
43  
44  
45  
46  
47  
48  
49  
50  
51  
52  
53  
54  
55  
56  
57  
58  
59  
60

17b If blinded, circumstances under which unblinding is permissible, and procedure for revealing a participant's allocated intervention during the trial

- not relevant

### Methods: Data collection, management, and analysis

Data collection methods 18a Plans for assessment and collection of outcome, baseline, and other trial data, including any related processes to promote data quality (eg, duplicate measurements, training of assessors) and a description of study instruments (eg, questionnaires, laboratory tests) along with their reliability and validity, if known. Reference to where data collection forms can be found, if not in the protocol

- See figure page 9 for plans for assessment and collection of data. For further information about study instruments see page 10 to 13. Information about reliability and validity of study instruments is missing, as are reference to where data collection forms can be found.

18b Plans to promote participant retention and complete follow-up, including list of any outcome data to be collected for participants who discontinue or deviate from intervention protocols

- missing from the protocol

Data management 19 Plans for data entry, coding, security, and storage, including any related processes to promote data quality (eg, double data entry; range checks for data values). Reference to where details of data management procedures can be found, if not in the protocol

- see page 13

Statistical methods 20a Statistical methods for analysing primary and secondary outcomes. Reference to where other details of the statistical analysis plan can be found, if not in the protocol

- missing

20b Methods for any additional analyses (eg, subgroup and adjusted analyses)

- missing

20c Definition of analysis population relating to protocol non-adherence (eg, as randomised analysis), and any statistical methods to handle missing data (eg, multiple imputation)

- missing

**Methods: Monitoring**

- 1  
2  
3  
4  
5  
6  
7  
8  
9  
10  
11  
12  
13  
14  
15  
16  
17  
18  
19  
20  
21  
22  
23  
24  
25  
26  
27  
28  
29  
30  
31  
32  
33
- Data monitoring 21a Composition of data monitoring committee (DMC); summary of its role and reporting structure; statement of whether it is independent from the sponsor and competing interests; and reference to where further details about its charter can be found, if not in the protocol. Alternatively, an explanation of why a DMC is not needed
- not relevant
- 21b Description of any interim analyses and stopping guidelines, including who will have access to these interim results and make the final decision to terminate the trial
- missing from the protocol
- Harms 22 Plans for collecting, assessing, reporting, and managing solicited and spontaneously reported adverse events and other unintended effects of trial interventions or trial conduct
- see page 13 and 14 for information about plan for managing participants who are in need of more extensive services.
- Auditing 23 Frequency and procedures for auditing trial conduct, if any, and whether the process will be independent from investigators and the sponsor
- not relevant

**Ethics and dissemination**

- 34  
35  
36  
37  
38  
39  
40  
41  
42  
43  
44  
45  
46  
47  
48  
49  
50  
51  
52  
53  
54  
55  
56  
57  
58  
59  
60
- Research ethics approval 24 Plans for seeking research ethics committee/institutional review board (REC/IRB) approval
- The Regional Committee for Medical Research Ethics in Northern Norway have approved the project, see page 13.
- Protocol amendments 25 Plans for communicating important protocol modifications (eg, changes to eligibility criteria, outcomes, analyses) to relevant parties (eg, investigators, REC/IRBs, trial participants, trial registries, journals, regulators)
- missing from the manuscript
- Consent or assent 26a Who will obtain informed consent or assent from potential trial participants or authorised surrogates, and how (see Item 32)
- see page 7 and 8

|    |                               |     |                                                                                                                                                                                                                                                                                     |
|----|-------------------------------|-----|-------------------------------------------------------------------------------------------------------------------------------------------------------------------------------------------------------------------------------------------------------------------------------------|
| 1  |                               | 26b | Additional consent provisions for collection and use of participant data and biological specimens in ancillary studies, if applicable                                                                                                                                               |
| 2  |                               |     |                                                                                                                                                                                                                                                                                     |
| 3  |                               |     |                                                                                                                                                                                                                                                                                     |
| 4  |                               |     |                                                                                                                                                                                                                                                                                     |
| 5  |                               |     | - not relevant                                                                                                                                                                                                                                                                      |
| 6  |                               |     |                                                                                                                                                                                                                                                                                     |
| 7  | Confidentiality               | 27  | How personal information about potential and enrolled participants will be collected, shared, and maintained in order to protect confidentiality before, during, and after the trial                                                                                                |
| 8  |                               |     |                                                                                                                                                                                                                                                                                     |
| 9  |                               |     |                                                                                                                                                                                                                                                                                     |
| 10 |                               |     |                                                                                                                                                                                                                                                                                     |
| 11 |                               |     | - Yes, see page 13                                                                                                                                                                                                                                                                  |
| 12 |                               |     |                                                                                                                                                                                                                                                                                     |
| 13 |                               |     |                                                                                                                                                                                                                                                                                     |
| 14 | Declaration of interests      | 28  | Financial and other competing interests for principal investigators for the overall trial and each study site                                                                                                                                                                       |
| 15 |                               |     |                                                                                                                                                                                                                                                                                     |
| 16 |                               |     |                                                                                                                                                                                                                                                                                     |
| 17 |                               |     | - yes, see page 15                                                                                                                                                                                                                                                                  |
| 18 |                               |     |                                                                                                                                                                                                                                                                                     |
| 19 | Access to data                | 29  | Statement of who will have access to the final trial dataset, and disclosure of contractual agreements that limit such access for investigators                                                                                                                                     |
| 20 |                               |     |                                                                                                                                                                                                                                                                                     |
| 21 |                               |     |                                                                                                                                                                                                                                                                                     |
| 22 |                               |     |                                                                                                                                                                                                                                                                                     |
| 23 |                               |     |                                                                                                                                                                                                                                                                                     |
| 24 |                               |     | - see page 15                                                                                                                                                                                                                                                                       |
| 25 |                               |     |                                                                                                                                                                                                                                                                                     |
| 26 | Ancillary and post-trial care | 30  | Provisions, if any, for ancillary and post-trial care, and for compensation to those who suffer harm from trial participation                                                                                                                                                       |
| 27 |                               |     |                                                                                                                                                                                                                                                                                     |
| 28 |                               |     |                                                                                                                                                                                                                                                                                     |
| 29 |                               |     |                                                                                                                                                                                                                                                                                     |
| 30 |                               |     | - not relevant                                                                                                                                                                                                                                                                      |
| 31 |                               |     |                                                                                                                                                                                                                                                                                     |
| 32 | Dissemination policy          | 31a | Plans for investigators and sponsor to communicate trial results to participants, healthcare professionals, the public, and other relevant groups (eg, via publication, reporting in results databases, or other data sharing arrangements), including any publication restrictions |
| 33 |                               |     |                                                                                                                                                                                                                                                                                     |
| 34 |                               |     |                                                                                                                                                                                                                                                                                     |
| 35 |                               |     |                                                                                                                                                                                                                                                                                     |
| 36 |                               |     |                                                                                                                                                                                                                                                                                     |
| 37 |                               |     |                                                                                                                                                                                                                                                                                     |
| 38 |                               |     | - yes, see page 14                                                                                                                                                                                                                                                                  |
| 39 |                               |     |                                                                                                                                                                                                                                                                                     |
| 40 |                               | 31b | Authorship eligibility guidelines and any intended use of professional writers                                                                                                                                                                                                      |
| 41 |                               |     |                                                                                                                                                                                                                                                                                     |
| 42 |                               |     |                                                                                                                                                                                                                                                                                     |
| 43 |                               |     | - missing                                                                                                                                                                                                                                                                           |
| 44 |                               |     |                                                                                                                                                                                                                                                                                     |
| 45 |                               | 31c | Plans, if any, for granting public access to the full protocol, participant-level dataset, and statistical code                                                                                                                                                                     |
| 46 |                               |     |                                                                                                                                                                                                                                                                                     |
| 47 |                               |     |                                                                                                                                                                                                                                                                                     |
| 48 |                               |     |                                                                                                                                                                                                                                                                                     |
| 49 |                               |     | - missing                                                                                                                                                                                                                                                                           |
| 50 |                               |     |                                                                                                                                                                                                                                                                                     |
| 51 | <b>Appendices</b>             |     |                                                                                                                                                                                                                                                                                     |
| 52 |                               |     |                                                                                                                                                                                                                                                                                     |
| 53 | Informed consent materials    | 32  | Model consent form and other related documentation given to participants and authorised surrogates                                                                                                                                                                                  |
| 54 |                               |     |                                                                                                                                                                                                                                                                                     |
| 55 |                               |     |                                                                                                                                                                                                                                                                                     |
| 56 |                               |     |                                                                                                                                                                                                                                                                                     |
| 57 |                               |     | - missing                                                                                                                                                                                                                                                                           |
| 58 |                               |     |                                                                                                                                                                                                                                                                                     |
| 59 |                               |     |                                                                                                                                                                                                                                                                                     |
| 60 |                               |     |                                                                                                                                                                                                                                                                                     |

1  
2  
3  
4  
5  
6  
7  
8  
9  
10  
11  
12  
13  
14  
15  
16  
17  
18  
19  
20  
21  
22  
23  
24  
25  
26  
27  
28  
29  
30  
31  
32  
33  
34  
35  
36  
37  
38  
39  
40  
41  
42  
43  
44  
45  
46  
47  
48  
49  
50  
51  
52  
53  
54  
55  
56  
57  
58  
59  
60

|                      |    |                                                                                                                                                                                                |
|----------------------|----|------------------------------------------------------------------------------------------------------------------------------------------------------------------------------------------------|
| Biological specimens | 33 | Plans for collection, laboratory evaluation, and storage of biological specimens for genetic or molecular analysis in the current trial and for future use in ancillary studies, if applicable |
|----------------------|----|------------------------------------------------------------------------------------------------------------------------------------------------------------------------------------------------|

- not relevant

---

\*It is strongly recommended that this checklist be read in conjunction with the SPIRIT 2013 Explanation & Elaboration for important clarification on the items. Amendments to the protocol should be tracked and dated. The SPIRIT checklist is copyrighted by the SPIRIT Group under the Creative Commons "[Attribution-NonCommercial-NoDerivs 3.0 Unported](#)" license.

For peer review only



## STROBE Statement—checklist of items that should be included in reports of observational studies

|                              | Item No | Recommendation                                                                                                                                                                                                                                                                                                                                                                                                                                                                                                                                |
|------------------------------|---------|-----------------------------------------------------------------------------------------------------------------------------------------------------------------------------------------------------------------------------------------------------------------------------------------------------------------------------------------------------------------------------------------------------------------------------------------------------------------------------------------------------------------------------------------------|
| <b>Title and abstract</b>    | 1       | (a) Indicate the study's design with a commonly used term in the title or the abstract<br>- Yes, page 1 in the manuscript<br><br>(b) Provide in the abstract an informative and balanced summary of what was done and what was found<br>- The abstract provides an informative summary of what we plan to do. The abstract is found in page 2 of the manuscript.                                                                                                                                                                              |
| <b>Introduction</b>          |         |                                                                                                                                                                                                                                                                                                                                                                                                                                                                                                                                               |
| Background/rationale         | 2       | Explain the scientific background and rationale for the investigation being reported<br>- Page 3 to 6 in the manuscript                                                                                                                                                                                                                                                                                                                                                                                                                       |
| Objectives                   | 3       | State specific objectives, including any prespecified hypotheses<br>- Page 6 and 7 in the manuscript                                                                                                                                                                                                                                                                                                                                                                                                                                          |
| <b>Methods</b>               |         |                                                                                                                                                                                                                                                                                                                                                                                                                                                                                                                                               |
| Study design                 | 4       | Present key elements of study design early in the paper<br>- Yes, key elements of study design are presented early in the method section. Page 7.                                                                                                                                                                                                                                                                                                                                                                                             |
| Setting                      | 5       | Describe the setting, locations, and relevant dates, including periods of recruitment, exposure, follow-up, and data collection<br>- Yes, found in pages 7 to 10 of the manuscript.                                                                                                                                                                                                                                                                                                                                                           |
| Participants                 | 6       | (a) <i>Cohort study</i> —Give the eligibility criteria, and the sources and methods of selection of participants. Describe methods of follow-up<br>- Eligibility criteria, and sources and methods of selection of participants are found in pages 7 and 8 of the manuscript<br><br>(b) <i>Cohort study</i> —For matched studies, give matching criteria and number of exposed and unexposed<br>- not relevant<br><i>Case-control study</i> —For matched studies, give matching criteria and the number of controls per case<br>-not relevant |
| Variables                    | 7       | Clearly define all outcomes, exposures, predictors, potential confounders, and effect modifiers. Give diagnostic criteria, if applicable<br>- Partly missing, but see page 10 to 13 for information about outcomes and predictors.                                                                                                                                                                                                                                                                                                            |
| Data sources/<br>measurement | 8*      | For each variable of interest, give sources of data and details of methods of assessment (measurement). Describe comparability of assessment methods if there is more than one group                                                                                                                                                                                                                                                                                                                                                          |
| Bias                         | 9       | Describe any efforts to address potential sources of bias<br>- Missing in the manuscript                                                                                                                                                                                                                                                                                                                                                                                                                                                      |
| Study size                   | 10      | Explain how the study size was arrived at<br>- Page 8 in the manuscript                                                                                                                                                                                                                                                                                                                                                                                                                                                                       |
| Quantitative variables       | 11      | Explain how quantitative variables were handled in the analyses. If applicable, describe which groupings were chosen and why<br>- Not relevant, since this is a study protocol article                                                                                                                                                                                                                                                                                                                                                        |

1  
2  
3  
4  
5  
6  
7  
8  
9  
10  
11  
12  
13  
14  
15  
16  
17  
18  
19  
20  
21  
22  
23  
24  
25  
26  
27  
28  
29  
30  
31  
32  
33  
34  
35  
36  
37  
38  
39  
40  
41  
42  
43  
44  
45  
46  
47  
48  
49  
50  
51  
52  
53  
54  
55  
56  
57  
58  
59  
60

Statistical methods

- 12 (a) Describe all statistical methods, including those used to control for confounding  
- Missing in the manuscript
- 
- (b) Describe any methods used to examine subgroups and interactions  
- Missing in the manuscript
- 
- (c) Explain how missing data were addressed  
- Missing in the manuscript
- 
- (d) *Cohort study*—If applicable, explain how loss to follow-up was addressed  
- Missing in the manuscript  
*Case-control study*—If applicable, explain how matching of cases and controls was addressed  
- not relevant  
*Cross-sectional study*—If applicable, describe analytical methods taking account of sampling strategy  
- not relevant
- 
- (e) Describe any sensitivity analyses  
- missing

Continued on next page

**Results**

|                   |     |                                                                                                                                                                                                                                |
|-------------------|-----|--------------------------------------------------------------------------------------------------------------------------------------------------------------------------------------------------------------------------------|
| Participants      | 13* | (a) Report numbers of individuals at each stage of study—eg numbers potentially eligible, examined for eligibility, confirmed eligible, included in the study, completing follow-up, and analysed<br>- not relevant            |
|                   |     | (b) Give reasons for non-participation at each stage<br>- not relevant                                                                                                                                                         |
|                   |     | (c) Consider use of a flow diagram<br>- not relevant                                                                                                                                                                           |
| Descriptive data  | 14* | (a) Give characteristics of study participants (eg demographic, clinical, social) and information on exposures and potential confounders<br>- Not relevant                                                                     |
|                   |     | (b) Indicate number of participants with missing data for each variable of interest<br>- Not relevant                                                                                                                          |
|                   |     | (c) <i>Cohort study</i> —Summarise follow-up time (eg, average and total amount)<br>- Not relevant                                                                                                                             |
| Outcome data      | 15* | <i>Cohort study</i> —Report numbers of outcome events or summary measures over time<br>- Not relevant                                                                                                                          |
|                   |     | <i>Case-control study</i> —Report numbers in each exposure category, or summary measures of exposure<br>- not relevant                                                                                                         |
|                   |     | <i>Cross-sectional study</i> —Report numbers of outcome events or summary measures<br>- not relevant                                                                                                                           |
| Main results      | 16  | (a) Give unadjusted estimates and, if applicable, confounder-adjusted estimates and their precision (eg, 95% confidence interval). Make clear which confounders were adjusted for and why they were included<br>- Not relevant |
|                   |     | (b) Report category boundaries when continuous variables were categorized<br>- Not relevant                                                                                                                                    |
|                   |     | (c) If relevant, consider translating estimates of relative risk into absolute risk for a meaningful time period<br>- Not relevant                                                                                             |
| Other analyses    | 17  | Report other analyses done—eg analyses of subgroups and interactions, and sensitivity analyses<br>- Not relevant.                                                                                                              |
| <b>Discussion</b> |     |                                                                                                                                                                                                                                |
| Key results       | 18  | Summarise key results with reference to study objectives<br>- not relevant                                                                                                                                                     |
| Limitations       | 19  | Discuss limitations of the study, taking into account sources of potential bias or imprecision. Discuss both direction and magnitude of any potential bias<br>-not relevant                                                    |
| Interpretation    | 20  | Give a cautious overall interpretation of results considering objectives, limitations, multiplicity of analyses, results from similar studies, and other relevant evidence<br>-not relevant                                    |
| Generalisability  | 21  | Discuss the generalisability (external validity) of the study results<br>- not relevant                                                                                                                                        |

**Other information**

---

Funding 22 Give the source of funding and the role of the funders for the present study and, if applicable, for the original study on which the present article is based  
- Yes, found in page 15 in the manuscript

\*Give information separately for cases and controls in case-control studies and, if applicable, for exposed and unexposed groups in cohort and cross-sectional studies.

**Note:** An Explanation and Elaboration article discusses each checklist item and gives methodological background and published examples of transparent reporting. The STROBE checklist is best used in conjunction with this article (freely available on the Web sites of PLoS Medicine at <http://www.plosmedicine.org/>, Annals of Internal Medicine at <http://www.annals.org/>, and Epidemiology at <http://www.epidem.com/>). Information on the STROBE Initiative is available at [www.strobe-statement.org](http://www.strobe-statement.org).

# BMJ Open

## Northern Babies: Predicting postpartum depression and improving parent-infant interaction with The Newborn Behavioral Observation Intervention: A non-randomized cluster controlled design nested in a longitudinal observational study

|                                 |                                                                                                                                                                                                                                                                                                                                                                                                                                                                                                                                                                                                                                                                                                                                                                                                                                                                                                                                                                                                                                         |
|---------------------------------|-----------------------------------------------------------------------------------------------------------------------------------------------------------------------------------------------------------------------------------------------------------------------------------------------------------------------------------------------------------------------------------------------------------------------------------------------------------------------------------------------------------------------------------------------------------------------------------------------------------------------------------------------------------------------------------------------------------------------------------------------------------------------------------------------------------------------------------------------------------------------------------------------------------------------------------------------------------------------------------------------------------------------------------------|
| Journal:                        | <i>BMJ Open</i>                                                                                                                                                                                                                                                                                                                                                                                                                                                                                                                                                                                                                                                                                                                                                                                                                                                                                                                                                                                                                         |
| Manuscript ID                   | bmjopen-2017-016005.R1                                                                                                                                                                                                                                                                                                                                                                                                                                                                                                                                                                                                                                                                                                                                                                                                                                                                                                                                                                                                                  |
| Article Type:                   | Protocol                                                                                                                                                                                                                                                                                                                                                                                                                                                                                                                                                                                                                                                                                                                                                                                                                                                                                                                                                                                                                                |
| Date Submitted by the Author:   | 17-May-2017                                                                                                                                                                                                                                                                                                                                                                                                                                                                                                                                                                                                                                                                                                                                                                                                                                                                                                                                                                                                                             |
| Complete List of Authors:       | Hoifodt, Ragnhild Sorensen; UiT The Arctic University of Norway, Department of Psychology; University Hospital of North Norway, Division of Mental Health and Addiction<br>Nordahl, Dag; UiT The Arctic University of Norway, Department of Psychology; University Hospital of North Norway, Division of Child and Adolescent Health<br>Pfuhl, Gerit ; UiT The Arctic University of Norway, Department of Psychology; Norwegian University of Science and Technology, Department of Psychology<br>Landsem, Inger Pauline; UiT The Arctic University of Norway, Department of Health and Care Sciences; University Hospital of North Norway, Division of Child and Adolescent Health<br>Thimm, Jens; UiT The Arctic University of Norway, Department of Psychology<br>Ilstad, Linn Kathrin; University Hospital of North Norway, Division of Mental Health and Addiction<br>Wang, Catharina; UiT The Arctic University of Norway, Department of Psychology; University Hospital of North Norway, Division of Child and Adolescent Health |
| <b>Primary Subject Heading</b>: | Mental health                                                                                                                                                                                                                                                                                                                                                                                                                                                                                                                                                                                                                                                                                                                                                                                                                                                                                                                                                                                                                           |
| Secondary Subject Heading:      | General practice / Family practice, Mental health, Nursing, Health services research                                                                                                                                                                                                                                                                                                                                                                                                                                                                                                                                                                                                                                                                                                                                                                                                                                                                                                                                                    |
| Keywords:                       | Child & adolescent psychiatry < PSYCHIATRY, Depression & mood disorders < PSYCHIATRY, MENTAL HEALTH                                                                                                                                                                                                                                                                                                                                                                                                                                                                                                                                                                                                                                                                                                                                                                                                                                                                                                                                     |
|                                 |                                                                                                                                                                                                                                                                                                                                                                                                                                                                                                                                                                                                                                                                                                                                                                                                                                                                                                                                                                                                                                         |

SCHOLARONE™  
Manuscripts

1  
2  
3  
4  
5  
6 Title:

7  
8 Northern Babies: Predicting postpartum depression and improving parent-infant  
9 interaction with The Newborn Behavioral Observation Intervention: A non-  
10 randomized cluster controlled design nested in a longitudinal observational study  
11  
12

13  
14  
15  
16 Research protocol of

17  
18  
19  
20  
21 Ragnhild Sørensen Høifødt\*<sup>1,2</sup> Dag Nordahl\*<sup>1,3</sup>,

22  
23 Gerit Pfuhl<sup>1,4</sup>, Inger Pauline Landsem<sup>3,5</sup>, Jens C. Thimm<sup>1</sup>, Linn Kathrin K. Ilstad<sup>2</sup>  
24 Catharina Elisabeth Arfwedson Wang<sup>1</sup>

25  
26  
27 \*These authors contributed equally  
28  
29  
30

31  
32 <sup>1</sup>Department of Psychology, Faculty of Health Sciences, UiT The Arctic University of Norway,  
33 Tromsø, Norway

34  
35 <sup>2</sup>Division of Mental Health and Addiction, University Hospital of North Norway, Tromsø, Norway

36  
37 <sup>3</sup>Division of Child and Adolescent Health, University Hospital of Northern Norway, Tromsø, Norway

38  
39 <sup>4</sup>Department of Psychology, Norwegian University of Science and Technology, Trondheim, Norway

40  
41 <sup>5</sup>Department of Health and Care Sciences, Faculty of Health Sciences, UiT The Arctic University of  
42 Norway, Tromsø, Norway  
43  
44  
45

46 Corresponding author:

47  
48 Dag Nordahl, Department of Psychology, Faculty of Health Sciences, UiT Arctic

49 University of Norway, 9037 Tromsø, Norway. Telephone: +47 77645807, Fax: +47

50  
51 77645291. E-mail: dag.nordahl@uit.no.  
52  
53  
54  
55  
56

57 Word count: 4358  
58  
59  
60

## Abstract

### Introduction

Postpartum depression (PPD) is a prevalent disorder. Studying the factors related to PPD will help to identify families at risk and provide preventive interventions. This can in turn improve the developmental trajectories for the children. Several previous studies have investigated risk factors for PPD. However, few studies have focused on cognitive vulnerability factors. The first aim of the present study is to explore a range of protective and risk factors, including cognitive factors, for PPD, parent-infant interactions and child development. The second aim of the study is to evaluate the effectiveness of The Newborn Behavioral Observation (NBO) as a universal preventive intervention delivered in routine practice. The NBO is a brief relationship-enhancing intervention that may reduce depressive symptomatology in mothers.

### Methods

The study is a longitudinal observational study with an intervention. The observational study uses a prospective cohort design, whereas the intervention-study has a non-randomized cluster controlled design comparing a group receiving NBO with a group receiving standard care. The intervention group will receive three NBO-sessions within the first four weeks post-delivery. Between 2015 and 2018 approximately 200 families will be recruited in the municipality of Tromsø, Norway. Parents are recruited during pregnancy, and assessments will be performed during gestational week 16 – 22, 24 – 30 and 31, and at 6 weeks, 4 months and 6 months post-delivery. Predictor variables include several cognitive vulnerability factors including early maladaptive schemas, implicit attitudes and cognitive processing of emotionally valenced infant facial information.

### Ethics and dissemination

The Regional Committee for Medical and Health Research Ethics in Northern Norway has approved the project. The research team has collaboration with local health services, and can assist participants who need more extensive follow-up. Results from the project will be disseminated in international and national peer-reviewed journals, and at courses and conferences.

**Trials registration number:** NCT02538497

### Strengths and limitations of this study

- This study will provide new knowledge about cognitive vulnerability and protective factors associated by postpartum depression, parent-infant interaction, and child development.
- The study is the first to examine the effect of Newborn Behavioral Observation (NBO), a brief relationship enhancing parent-infant intervention, delivered as a universal preventive intervention both for postpartum depression and for parent-infant interaction difficulties.
- Mothers, infants and fathers are followed through 6 assessments; from gestational week 16-22 until 6 months post-delivery.
- A limitation of the study is that the participants are not randomly assigned to the intervention and control group, respectively.
- Further limitations are that depression is measured by self-report questionnaires only, and that potentially important factors such as parental personality and other mental health variables, e.g., anxiety and PTSD symptoms, are not included.

The transition into parenthood is a period with great biological and psychosocial changes, and is associated with an elevated risk for depressed mood for both mothers and fathers (1). The prevalence of postpartum depression (PPD) is between 10 % and 15% for women (2, 3), and between 5 % and 10 % for men (1, 4-9). However, a meta-analysis suggested the rate in men may be as high as 25 % in the period between 3- and 6-months postpartum (9).

Important risk factors for developing maternal PPD include antenatal depression and anxiety, previous psychiatric illness, a poor marital relationship, life stressors, a negative attitude towards pregnancy and lack of social support (10). Adverse childhood experiences are in general considered a risk for depression (11) and stress (12) in adulthood. In addition, an insecure adult attachment style is shown to be related to maternal PPD (13). Paternal PPD shares many of the same risk factors as maternal PPD (5, 6). However, the most common correlate for paternal postpartum depression is having a depressed partner (8, 14). Thus, depression in one parent increases the risk for couple comorbidity where both parents become depressed.



## Cognition in PPD

Parents' ability to cope with and relate to this transitional period can be assessed by measuring their cognitive schemas and information processing. Cognition may have an important role in the development of maternal PPD and may affect the quality of mother-infant interactions. In fact, cognitive factors such as negative self-schemas (15), antenatal self-devaluating tendencies, a lack of specificity in autobiographical retrieval (16), brooding rumination and negative inferential styles (17) have been found to be predictive of depressive symptoms after childbirth.

Further, depression is characterized by impairments and deviations from normal functioning across a broad range of cognitive domains, e.g., attention, attitudes, memory (18, 19). For instance, there is support for a depression related bias for processing of facial information (20-24). Research suggests that mothers with symptoms of PPD rate negative infant faces more negatively compared to non-depressed mothers (25). Also, mothers with PPD may less accurately identify happy infant faces compared to healthy controls (26), and lower accuracy may be associated with higher levels of maternal depression (27). Gil, Teissèdre, Chambres and Droit-Voilet (28) found that judgment of facial expressions depended largely on anxiety, but intensity of depressed mood was correlated to judging infant faces as less neutral. Still, research on cognitive biases for facial information in PPD is limited.

The cognitive mechanisms that may mediate the effect of PPD on parenting are not well understood. Rumination in depressed mothers is associated with difficulties in the mother-infant relationship, probably because the depressed mother's focus is mostly on herself and not on the needs of the child (29). Müller, Teismann, Havemann, Michalak and Seehagen (30) also found that maternal rumination in pregnancy was related to an impaired mother-infant relationship postpartum. In addition, parents processing of infants facial expression is indicated to have an important role for attunement, emotional attachment, and emotional regulation (31).

## Impact of PPD on parent-infant interaction

1  
2  
3 Parental psychopathology such as depression and anxiety may interfere with  
4 the parent-infant relationship (32, 33). This pertains not only to postnatal mental  
5 health, but also psychopathology in the antenatal period. In fact, a study by Parfitt,  
6 Pike and Ayers (34) indicated that prenatal mental health, especially anxiety, was  
7 related to parent-infant interaction to a greater extent than postnatal measures.  
8  
9

10  
11 Although a range of mental health issues are related to parental-child  
12 outcomes, the focus of this study will mainly be on depression. Maternal depression  
13 may interfere with healthy interactions with the infant by reducing the mother's  
14 ability to be sensitively attuned and responsive to her infant's signals and needs (35-  
15 38). Depressed mothers may also show a more negative (hostile and intrusive) and  
16 less responsive parenting style (39). Furthermore, they may touch and talk less with  
17 their infant and may show more negative facial expressions during face-to-face-  
18 interaction (40).  
19  
20

21  
22 Emerging research on the maternal brain and hormones shows that processes  
23 underlying parent-infant relationships and parental sensitivity are complex and  
24 include markers related to PPD and exposure to childhood adversity (see 41 for a  
25 review). There is indication that mothers with depression tend to have poorer  
26 mentalization skills (42). Mentalization can be defined as the capacity to understand  
27 the behavior of oneself and others in terms of underlying mental states and intentions  
28 (43), whereas reflective functioning is described as an overt manifestation of the  
29 capacity to mentalize (44). Depressed mothers may have difficulty reading the  
30 affective communication of the infant and responding appropriately (40).  
31 Accordingly, the ability for affect regulation and interactive coordination is impaired  
32 (45, 46). The capacity to mentalize develops through a child's social interaction with  
33 a caregiver who has the ability to understand the child as an individual with a mind  
34 (47). Thus, a parent's own unresolved adverse childhood experiences might both  
35 increase the risk of psychopathology, as well as impact on their own capacity for  
36 reflective functioning and ability to bond (44, 48, 49). Parental reflective functioning  
37 may further be related to infant attachment (50). A recent meta-analysis (51) supports  
38 the existence of an intergenerational transmission of attachment patterns, but  
39 concludes that caregiver sensitivity cannot fully explain the transmission and that  
40 other moderators are not fully understood. This picture is further complicated by  
41 studies suggesting that insecure ambivalent infants often have insecure avoidant  
42  
43  
44  
45  
46  
47  
48  
49  
50  
51  
52  
53  
54  
55  
56  
57  
58  
59  
60

1  
2  
3 mothers and the other way around (52). Studies suggest that parental reflective  
4 functioning may be one factor in the intergenerational transmission of attachment  
5 patterns (53).  
6  
7

### 8 9 **Consequences for the child**

10  
11 It is well-documented that maternal depression has an adverse effect on the  
12 child's development (40, 54). Children of depressed mothers are more likely to have  
13 cognitive, behavioural, emotional, and attachment difficulties in childhood (55, 56).  
14 Disrupted maternal affective communication is linked with attachment  
15 disorganization (57). Disorganized attachment is overrepresented in children of  
16 depressed mothers (55), and is associated with internalizing and externalizing  
17 behavior problems (58, 59). The risk for adverse outcomes such as poorer school  
18 adjustment, lower peer social competence, and an increased risk for depression persist  
19 into later childhood and adolescence (60-62).  
20  
21  
22  
23  
24  
25

26  
27 Maternal insensitivity can also influence infant stress-related physiology, as  
28 shown by greater activation of the autonomic nervous system (63, 64). Infants of  
29 more sensitive mothers show higher resting heart rate variability (HRV) compared to  
30 infants of less sensitive mothers (64). Heart rate variability is proposed as a marker  
31 for stress and health (65). Higher HRV is associated with more adaptive coping and  
32 emotion regulation, and lower HRV is related to negative outcomes such as  
33 depression and anxiety implicating emotional dysregulation (66).  
34  
35  
36  
37  
38

39  
40 Paternal PPD also has important implications. Studies show that even after  
41 controlling for maternal depression, depression in fathers in the pre- and postnatal  
42 period is related to negative social, emotional and behavioral outcomes for the child  
43 up to 7 years of age (4, 67-69). Some studies suggest that postpartum depression in  
44 fathers may be especially associated with an increased risk for oppositional defiant  
45 and conduct disorders in boys (4, 67).  
46  
47  
48  
49  
50

### 51 52 **Prevention and Treatment of PPD**

53  
54 PPD in mothers can be conceptualized as a mother-infant relationship disorder  
55 (70). Thus, interventions improving parent-infant interactions can potentially improve  
56 and prevent maternal PPD, as well as improve the trajectories for the children (71,  
57  
58  
59  
60

72). Such preventive efforts could have important societal implications. A recent report lists the high level of costs associated with maternal perinatal health problems (73), and concludes that even modest improvements in outcomes as a result of better services would benefit society.

One such relationship-enhancing intervention is The Newborn Behavioral Observation (NBO; 74). The NBO is a brief, low-cost intervention that can be used in a range of settings (75). The intervention can be delivered from around the time of birth, and it is compatible with the regular practice of public health nurses in Norway, and has been implemented as standard care in several regions. The goal of NBO is to sensitize parents to their infant's competencies and to how the newborn baby communicates through body signs, movements, state regulation, and responsivity (74). Enhanced understanding of how to "read the baby" can contribute to the development of a positive parent-infant relationship. Compared to usual care NBO has been found to be related to higher perceived parent- infant interaction quality among parents of high-risk infants (76). In addition, results from a pilot study indicated that delivering NBO as a universal preventive intervention can be related to lower depressive symptomatology in first-time mothers (77). By increasing parental sensitivity, the intervention also has the potential to positively affect biomarkers related to infant stress, as indicated by previous studies of attachment-based interventions (78). However, research on the effect of NBO as a preventive intervention is scarce, and there is a need for more studies.

## Aims

The present study has three broad aims:

- 1) *Examine key pre- and postnatal predictors related to parental functioning:* a) parental depression, anxiety, and stress, b) parental reflective functioning in relation to the infant, and c) parent-infant attachment style.
- 2) *Examine key pre- and postnatal predictors related to interaction and developmental problems in the child:* a) difficulties in parent-infant interaction in the first 4 months post-delivery, and b) infant's cognitive, communicative and motor development, signs of sustained withdrawal behaviour, and heart-rate variability at 6 months post-delivery.

1  
2  
3 3) *Evaluate the effectiveness of the NBO as a universal preventive intervention*  
4 delivered in routine practice as compared to standard care, on:

- 5  
6  
7 - Parental outcomes (depressive symptoms, parenting stress, reflective  
8 functioning, attachment to the infant),  
9  
10 - Relational outcomes (emotional availability in parent-child interaction), and  
11  
12 - Infant outcomes (cognitive, communicative and motor development at 6  
13 months post-delivery, heart-rate variability).  
14  
15

16  
17 Predictor variables include some well-known vulnerability factors for  
18 developing PPD (e.g., depression symptoms in pregnancy, adult attachment style,  
19 relationship satisfaction and life stress), but the main focus in the observational part of  
20 the research project is on cognitive vulnerability factors such as early maladaptive  
21 schemas, repetitive negative thinking, rumination, implicit attitudes and cognitive  
22 processing of emotionally valenced infant facial information.  
23  
24  
25  
26  
27  
28  
29

## 30 **Methods**

### 31 **Study design**

32  
33 This is a longitudinal observational study with an intervention. The  
34 observational part of the study will use a prospective cohort design. The effect of the  
35 intervention will be evaluated using a non-randomized cluster controlled design, since  
36 neither cluster nor individual randomization is feasible in this routine practice setting.  
37 An intervention group receiving NBO (families belonging to two well-baby clinics in  
38 Tromsø municipality) will be compared with a control group (families at the  
39 remaining four well-baby clinics in Tromsø) receiving care as usual.  
40  
41  
42  
43  
44  
45  
46  
47  
48

### 49 **Recruitment**

50  
51 All pregnant women and expecting fathers who speak Norwegian are eligible  
52 for inclusion in the study. Between autumn 2015 and autumn 2018 approximately 200  
53 families will be recruited by midwives and by general practitioners (GPs) in the  
54 municipality of Tromsø, which is the 9th largest municipality in Norway (~73000  
55  
56  
57  
58  
59  
60

1  
2  
3 inhabitants; 79). There are approximately 1000 births a year in Tromsø municipality.  
4 Based on the experiences from a comparable study, “Little in Norway” (80), the  
5 recruitment of 200 families within the project period is considered feasible.  
6  
7

8  
9 The participants will be recruited in (approximately) week 16 of gestation. At  
10 recruitment, women will be given written information about the study and a flyer with  
11 an inquiry to be contacted by the research team. If the child’s father is not present, the  
12 mother is encouraged to inform him about the study. The health worker informs the  
13 research team who contacts the women to plan a meeting with them and their  
14 partners, preferable between week 16 and 22 of gestation. In this meeting, the  
15 prospective parents are given detailed information about the study and are invited to  
16 sign an informed consent to participate. In addition, at 4 months post-delivery the  
17 parents will be asked to sign an informed consent to obtain birth related information  
18 from the birth record.  
19  
20  
21  
22  
23  
24  
25  
26  
27

### 28 **Power calculations/statistical analysis**

29  
30 The sample size is calculated on the basis of differences between intervention  
31 group and standard care group on the Edinburgh Postnatal Depression Scale (EPDS)  
32 maternal score, the *Parenting Stress Index* (PSI-PD), the *Parental Reflective*  
33 *Functioning Scale* (PRFQ) and the *Maternal Postnatal Attachment Scale* (MPAS) 6  
34 weeks post-delivery. Based on the pilot study by Nugent et al. (77) and some  
35 regression to the mean, we expect a small to medium effect size ( $f^2 = .07$ ). A  
36 MANOVA with the four aforementioned outcome variables can detect a difference  
37 between the groups with a power of .80 given a group sizes of  $N = 176$ . With an  
38 estimated dropout of 10 %, a group size of 200 will be recruited. The estimation is  
39 based on an  $\alpha$ -level of .05.  
40  
41  
42  
43  
44  
45  
46  
47  
48  
49

### 50 **Procedure**

51  
52 For the observational part of the study, assessments will be performed at six  
53 time points (see Table 1): During gestational week 16 – 22 (Step 1), 24 – 30 (Step 2)  
54 and 31 (Step 3), and at 6 weeks (Step 4), 4 months (Step 5) and 6 months (Step 6)  
55 post-delivery. For the intervention study, pre-intervention measures will be collected  
56  
57  
58  
59  
60

at Step 3, post-intervention measures at Step 4 and follow-up measures at Step 5 and 6. Since the families will receive the first NBO already two-days post-delivery, no pre-test assessment can be obtained for the interaction and infant measures. Hence, analyses of intervention effects will be based on differences between groups at 4 and 6 months post-delivery controlling for relevant covariates. The data is collected using online questionnaires, computerized cognitive tests, video-filmed observations of mother-infant interactions, and a standardised test of the child's cognitive, communicative and motor development (Bayley Scales of Infant and Toddler Development; 81).

**Table 1 Study protocol and data collection at different time points during the study**

| Data collection                                 | T1 <sup>1</sup> | T2 <sup>2</sup> | T3 <sup>3</sup> | Birth | T4 <sup>4</sup> | T5 <sup>5</sup> | T6 <sup>6</sup> |
|-------------------------------------------------|-----------------|-----------------|-----------------|-------|-----------------|-----------------|-----------------|
| <b><u>Women/mothers and men/fathers</u></b>     |                 |                 |                 |       |                 |                 |                 |
| Demographic information                         | •               |                 |                 |       |                 |                 |                 |
| EPDS (Depressive symptoms)                      | •               | •               | •               |       | •               | •               | •               |
| BDI-II (Depressive symptoms)                    | •               |                 |                 |       |                 | •               |                 |
| PRAQ-R (Pregnancy related anxiety)              | •               | •               | •               |       |                 |                 |                 |
| ACE (Adverse childhood experiences)             | •               |                 |                 |       |                 |                 |                 |
| TWEAK (Risk drinking during pregnancy)          | •               |                 |                 |       |                 |                 |                 |
| PTQ (Repetitive negative thinking)              | •               |                 |                 |       | •               |                 |                 |
| LSS (Life stress)                               | •               |                 |                 |       |                 | •               |                 |
| IAT (Implicit associations)                     | •               |                 |                 |       |                 | •               |                 |
| EDP (Selective attention)                       | •               |                 |                 |       |                 | •               |                 |
| YSQ (Maladaptive core beliefs)                  |                 | •               |                 |       |                 |                 |                 |
| The face recognition task                       |                 | •               |                 |       | •               |                 |                 |
| RRS (Rumination)                                |                 |                 | •               |       |                 |                 |                 |
| MAAS / PAAS (Prenatal self reported attachment) |                 |                 | •               |       |                 |                 |                 |
| ECR-R (Adult attachment style)                  |                 |                 | •               |       |                 |                 |                 |
| SWLS (Quality of life)                          |                 |                 | •               |       | •               |                 |                 |
| MPAS / PPAS (Parent-infant self reported)       |                 |                 | •               |       | •               |                 |                 |

Routine care plus 3 NBO consultations vs. Routine care

1  
2  
3 attachment)

4 PRFQ (Reflective functioning) • •

6 PSI-PD (Parenting stress) •

8 PSI (Parenting stress) •

10 Heart rate variability •

11 **Parents - infants**

13 Obstetric information •

14 The diurnal clock (Sleep wakefulness and  
15 distress diary) •

17 EAS (Parent-child interaction) •

19 CRTQ (Infant temperament) •

21 Heart rate variability •

22 ADBB (Infant withdrawal behavior) •

24 BSITD – screening version (Infant  
25 development) •

26  
27 

---

Note. <sup>1</sup>T1: 16-22 weeks gestation.

28 <sup>2</sup>T2: 24-30 weeks gestation.

30 <sup>3</sup>T3 / pre-intervention measures: about 31 week gestation.

31 <sup>4</sup>T4 / post-intervention measures: 6 weeks postpartum.

33 <sup>5</sup>T5 / follow-up measures: 4 months postpartum.

34 <sup>6</sup>T6 / follow-up measures: 6 months postpartum.

37  
38  
39 **The intervention**

40  
41 The NBO is designed to strengthen the parent-infant relationship and foster a  
42 positive alliance between the family and the health-care provider. It takes 20 to 40  
43 minutes to administer and consists of 18 neurobehavioral observations which give a  
44 profile of the infant's behavioural repertoire along the dimensions: attentional-  
45 interactional, autonomic, motor and state organization (74). How many items that are  
46 used in each NBO session depends on the child's state (e.g., asleep, awake and calm,  
47 or crying). This is in line with the recommendations for use of NBO in Norway (82)  
48 The parents are invited to actively participate in the shared observation of the infant's  
49 unique behavioural expressions. Together with the clinician, they can identify  
50 techniques for meeting the infant's responses, as well as ventilate feelings and  
51 thoughts, and ask questions.  
52  
53  
54  
55  
56  
57  
58  
59  
60



1  
2  
3 The intervention group will receive three NBO consultations: 1) Routine care  
4 plus NBO at the maternity ward in hospital within two days post-delivery; 2) Routine  
5 home visit plus the NBO by a public health nurse when the infant is 7-10 days old;  
6 and 3) NBO at the well-baby clinic when the infant is 4 weeks old. The intervention  
7 will be conducted by midwives at the University Hospital of North Norway (UNN),  
8 and public health nurses in Tromsø municipality. Both the midwives and health  
9 nurses are certified in using the NBO. The control group will receive care as usual.  
10 Between 7 and 10 days after birth a public health nurse routinely visits the family at  
11 home to evaluate the baby's weight gain and provide guidance on topics such as  
12 feeding, crying, sleeping patterns and handling the baby. The parents can also ask  
13 questions and voice concerns. Six weeks after birth, the mother and the infant visit the  
14 well-baby clinic. Participants in both groups have equal possibilities to seek out other  
15 health care interventions for their own or their baby's health during the project period.  
16  
17  
18  
19  
20  
21  
22  
23  
24  
25  
26  
27

## 28 **Instruments**

### 29 **Predictor variables / independent variables.**

30  
31  
32 ***Socio-demographics.*** This includes questions about gender, age, education,  
33 marital status, work situation, income, ethnicity, social support, whether pregnancy is  
34 wanted, number of pregnancies and children, medication, smoking, and questions  
35 about current and previous mental and physical health, as well as help seeking for  
36 mental health issues.  
37  
38  
39

40  
41 ***Parental cognition and maladaptive schemas.*** *The Rumination Response*  
42 *Scale* (RRS; 83) is a 22-item self-report measure designed to assess responses to  
43 depressed mood that are focused on the self, the symptoms, and on possible causes  
44 and consequences. *The Perseverative Thinking Questionnaire* (PTQ; 84) is a 15-item  
45 self-report measure developed as a content independent measure of repetitive negative  
46 thinking. *The Young Schema Questionnaire* (YSQ; 85) consists of 90 items measuring  
47 maladaptive core beliefs about the self and others that are rooted in adverse relational  
48 experiences in childhood and adolescence.  
49  
50  
51  
52

53  
54 ***Parental relationship measures.*** *Adverse Childhood Experiences* (ACE; 86) is  
55 a 10-item measure of emotional, physical, and sexual maltreatment and abuse in  
56 childhood. *The Experiences in Close Relationships-Revised Questionnaire* (ECR-R;  
57  
58  
59  
60

1  
2  
3 87) is a 36-item measure of adult attachment style. The ECR-R includes two  
4 attachment subscales: avoidance and anxiety. *The Maternal Antenatal Attachment*  
5 *Scale* (MAAS; 88) is a 19-item self-report used to assess maternal antenatal bonding  
6 to the foetus. *The Paternal Antenatal Attachment Scale* (PAAS; 89) is a 16-item self-  
7 report measure used to assess paternal behaviours, attitudes and feelings towards the  
8 foetus.  
9

10  
11  
12  
13 ***Measures of parental stress and alcohol abuse.*** *The Life stress scale* (LSS) is  
14 a subscale of the Parenting Stress Index (PSI; 90) consisting of 19 items measuring  
15 stress factors over the last 12 months. *The Pregnancy-Related Anxiety Questionnaire*  
16 (PRAQ-R; 91) is a 10-item self-report inventory that assesses three subscales of  
17 anxiety that are specific to pregnancy: fear of giving birth, fear of bearing a  
18 handicapped child, and pregnancy-related concerns about one's appearance. *The*  
19 *Tolerance, Worried, Eye-opener, Amnesia, Kut down* (TWEAK; 92) is a 5-item self-  
20 report scale developed to screen for risk drinking during pregnancy.  
21  
22

23  
24  
25  
26  
27 ***Experimental tests.*** Parental cognition and a potential depression related  
28 negative bias to infant signals (93) will be measured with a) a face recognition task  
29 (94, 95) b) a single category Implicit Associations Test (IAT) (96) and c) a modified  
30 Emotional Dot-Probe (EDP) Task (20, 97). The tests will be administered pre- and  
31 postpartum. A) *The face recognition task* measures bias towards memory of facial  
32 expressions. Pilot data yielded that patients with major depression were better in  
33 recognizing faces of negative valence than a matched control group (95). B) *The IAT*  
34 is a well-established measure of implicit attitudes towards the tested categories, e.g.,  
35 objects or persons (including the self). By associating the category of interest with  
36 positive and negative words, the resulting difference in reaction times sheds light on a  
37 person's attitude. We will use a single-category IAT to investigate attitudes towards  
38 infants, using neutral infant images (98). C) *The EDP* is a test used to assess selective  
39 attention. The presentation of emotional stimuli interferes with a spatial task to  
40 respond as quickly as possible to the location of a seen target (e.g. a dot or cross). In  
41 this exogenous cueing task, emotional infant faces (98) are presented either on the left  
42 or right side of the screen. Immediately after a probe is shown. The task is to respond  
43 as quickly as possible to the location of the probe. The valence of the stimulus and the  
44 mood of the subject biases attention either towards or away from the probe location  
45 (99, 100).  
46  
47  
48  
49  
50  
51  
52  
53  
54  
55  
56  
57  
58  
59  
60

## Outcome measures.

**Parental measures of depression, stress and quality of life.** *The Edinburgh Postnatal Depression Scale* (EPDS; 101) is a 10-item self-report inventory designed to identify women at risk for postnatal depression. Scores on the EPDS range from 0 - 30, and we use a threshold of 10 or more to define at least probable minor depression (102, 103). The scale is also validated for use in men (104). Depression severity will be assessed with *the Beck Depression Inventory-II* (BDI-II) (105). BDI-II is a 21-item self-report inventory, and scores on the inventory range from 0-63. Total scores will be categorized as follows: 0-13 minimal, 14-19 mild, 20-28 moderate and 29-63 severe. Depressive symptoms during pregnancy assessed with these scales will also be used as predictor variables. *The Parenting Stress Index* (PSI-FF, third edition; 90) is a parent self-report measure consisting of 120 items. It is designed to identify potentially dysfunctional parent-child systems and parental stress. The PSI yields a total stress score, and scores for two general domains: Child Domain and Parent Domain and the LSS (previously described). Quality of life will be assessed with *the Satisfaction With Life Scale* (SWLS) which is a 5-item scale measuring global life satisfaction according to the individual's own criteria (106). In addition, one item asking participants to rate how happy they feel will be included (107).

**Parent-infant measures.** In order to assess parent-child interaction, we will employ *the Emotional Availability Scale* (Infancy to Early Childhood Version up to 4 years) (EAS; 108). The EAS is rated on the basis of 15-30 minutes videotaped episodes of mother-infant play interaction. *The Parental Reflective Functioning Questionnaire* (PRFQ; 109) is an 18-item self-report questionnaire. It consists of three subscales: pre-mentalizing, certainty in mental states and interest and curiosity in mental states. *The Maternal Postnatal Attachment Scale* (MPAS; 110) and *The Paternal Postnatal Attachment Scale* (PPAS; 111) are 19-item self-report questionnaires for measuring mother- / father-infant attachment.

**Infant measures.** *The Cameron-Rice Temperament Questionnaire* (CRTQ; 112) is a 45-item inventory in which parents are asked to rate their infant's sensitivity, general activity, general intensity, frustration tolerance, adaptability, regularity, and soothability. *The diurnal clock* (DC; 113) is a sleep diary with quantifiable information about sleep, wakefulness and distress over a 24-h period. Prior to the

1  
2  
3 meeting at 6-weeks post-delivery the parents are sent two copies of this registration  
4 chart and are instructed to complete them over a 48 h period. *The screening test*  
5 *version of Bayley Scales of Infant and Toddler Development* (BSITD - Screening  
6 version; 81) is a short version of the Bayley-III full-scale version. Bayley is a test of  
7 cognitive, communicative and motor development, widely used for research and  
8 clinical purposes. *The Alarm Distress Baby Scale* (ADBB; 114) is completed based on  
9 child behavior during administration of the Bayley at 6 months. This scale is designed  
10 to detect signs of sustained withdrawal behavior in infants 2–24 months of age.

11  
12  
13  
14  
15  
16  
17 **Biological measures.** Heart rate variability will be measured in parents and  
18 infants during child cognitive testing using wireless unobtrusive electrocardiogram  
19 (ECG)-equipment (115).

20  
21  
22  
23 **Fidelity measure.** After each NBO consultation the interventionist fills out a  
24 fidelity form developed for the current study that indicates which NBO-items were  
25 performed, who participated (mother, father etc.), intervention duration and which  
26 themes were discussed. The health workers also rate how they performed the  
27 intervention, e.g., to which degree they interpreted the baby's signals together with  
28 the parents, validated the parents' observations and skills, summed up their  
29 observations of the baby's strengths and need for support, and how much they  
30 counselled the parents.  
31  
32  
33  
34  
35  
36  
37  
38

### 39 **Ethical considerations and dissemination**

40  
41 The project follows the standards of the WMA Declaration of Helsinki –  
42 Ethical Principles for Medical Research Involving Human Subjects, and the project  
43 has been approved by the Regional Committee for Medical and Health Research  
44 Ethics in Northern Norway (2015/614). All participants receive both oral and written  
45 information about the project. Parents give informed consent for themselves and their  
46 infant's participation. Participants receive unique IDs, which they use for  
47 questionnaires, cognitive tests and observations. The sheet connecting IDs with names  
48 will be securely stored separately from the data. Only authorized personnel from the  
49 project will have access to this sheet. We are using a university survey system to  
50 ensure secure data storage. All investigators will have access to a data set cleaned of  
51 all personal identifiable information. Data sets will be password protected.  
52  
53  
54  
55  
56  
57  
58  
59  
60

1  
2  
3 During the data collection, it will be emphasized that the participant is free to  
4 decline the researcher's involvement. None of the assessments or interventions  
5 involves any health risks. As we cooperate with both primary health care in Tromsø  
6 municipality and the specialist mental health care services and they are well informed  
7 about the study, participants who are in need of more extensive services will be  
8 helped to get in touch with the health services for further treatment.  
9  
10

11  
12  
13 Results from the project will be disseminated in international and national  
14 peer-reviewed journals. The results will also be communicated at courses and  
15 conferences. In addition, results will be disseminated to the public in various media  
16 outlets, and study participants will be informed of the results through the study  
17 website: <http://site.uit.no/SIN>  
18  
19  
20  
21  
22  
23

## 24 Discussion

25  
26  
27 PPD is common among mothers and fathers. There is accumulating evidence  
28 that PPD interferes with a healthy interaction between parents and infants, as well as  
29 negative developmental outcomes for the child up to several years later. This study  
30 aims to increase the knowledge of cognitive risk factors for postpartum depression,  
31 interaction difficulties with the child and child development. Such knowledge will be  
32 of help in identifying risk families as early as pregnancy. In addition, we aim to  
33 investigate if NBO can be effective in preventing PPD and parent-infant interaction  
34 problems.  
35  
36  
37  
38  
39

40  
41 The main focus of the observation part of the study is to investigate cognitive  
42 risk factors for PPD and parent-infant relationship difficulties. Cognition is a  
43 predictor that has received relatively little attention in this field of research. Several  
44 researchers have suggested that cognitive processing and interpretation of infant  
45 signals is central for the parents' attunement to their child. To explore this assumption  
46 we have set up three cognitive tests using pictures of emotional infant faces to  
47 measure parents' attention, memory and implicit associations towards infants.  
48  
49  
50  
51  
52

53 Furthermore, the study expands on the transgenerational perspective by  
54 looking at parent's own adverse childhood experiences as background and reflective  
55 functioning for their coping with the postpartum period and relating to their infant.  
56  
57  
58  
59  
60

1  
2  
3 Further, we will study how this influences infant stress-related physiology, as  
4 measured with heart rate variability, which is proposed as a marker for emotion  
5 regulation.  
6  
7

8  
9 There is a need for interventions with a potential for preventing PPD and  
10 improving the parent- infant relationship. This may further promote a healthy  
11 development of the child. The NBO is a brief intervention that aims to sensitize  
12 parents to their infant's competencies. In the present study, one group of parents will  
13 receive three NBO-sessions as a universal preventive intervention during the first four  
14 weeks after birth, while the control group will receive standard health care. We will  
15 examine the NBO's potential positive effects on the parent-infant relationship, as well  
16 as in reducing depressive symptoms in the parents.  
17  
18  
19  
20  
21

22  
23 Finally, although fathers have become more active caregivers for infants in  
24 many societies, they are to a lesser degree included in research in this field compared  
25 to women. Accordingly, we also include fathers to explore their experiences in this  
26 period of transition, and examine factors associated with their relationship with the  
27 infant.  
28  
29  
30  
31  
32  
33

#### 34 **Contributors**

35 Study concept and design: Høifødt, Nordahl, Pfuhl, Landsem, Thimm, Ilstad, and Wang have all  
36 contributed equally to study concept and design. Drafting the manuscript: Høifødt, Nordahl, Pfuhl and  
37 Wang. Critical revision of the manuscript for important intellectual content: Høifødt, Nordahl, Pfuhl,  
38 Landsem, Thimm, Ilstad, and Wang.  
39

40  
41 **Funding** This study is supported by 'The National Program for Integrated Clinical Specialist and PhD-  
42 training for Psychologists' in Norway. This program is a cooperation between the Universities of  
43 Bergen, Oslo, Tromsø, the Norwegian University of Science and Technology (Trondheim), the  
44 Regional Health Authorities and the Norwegian Psychological Association. The program is funded  
45 jointly by The Ministry of Education and Research and The Ministry of Health and Care Services.  
46 Also, the Department of Psychology, the Faculty of Health Sciences, UiT The Arctic University of  
47 Norway has funded the post doc and research assistants who help in the study. Role of the  
48 funder/sponsor: The study sponsor had no role in the study concept, design and implementation of the  
49 study; collection, management, preparation, review, or approval of the manuscript, or the decision to  
50 submit the manuscript for publication. Obtained funding: Høifødt, Nordahl, Pfuhl, Thimm, and Wang.  
51  
52

53 **Competing interests** None declared.

54  
55 **Ethics approval** The project has been approved by the Regional Committee for Medical and Health  
56 Research Ethics in Northern Norway (2015/614).

57  
58 **Data sharing statement** The data will be presented through peer-reviewed journals and conference  
59 presentation.  
60

## References

1. Matthey S, Barnett B, Ungerer J, Waters B. Paternal and maternal depressed mood during the transition to parenthood. *Journal of Affective Disorders*. 2000;60(2):75-85.
2. O'Hara MW, Swain AM. Rates and risk of postpartum depression: A meta-analysis. *International Review of Psychiatry*. 1996;8(1):37-54.
3. Reck C, Struben K, Backenstrass M, Stefenelli U, Reinig K, Fuchs T, et al. Prevalence, onset and comorbidity of postpartum anxiety and depressive disorders. *Acta Psychiatrica Scandinavica*. 2008;118(6):459-68.
4. Ramchandani P, O'Connor TG, Evans J, Heron J, Murray L, Stein A. The effects of pre- and postnatal depression in fathers: A natural experiment comparing the effects of exposure to depression on offspring. *Journal of Child Psychology and Psychiatry*. 2008;49(10):1069-78.
5. Bergström M. Depressive symptoms in new first-time fathers: Associations with age, sociodemographic characteristics, and antenatal psychological well-being. *Birth*. 2013;40(1):32-8.
6. Demontigny F, Girard ME, Lacharité C, Dubeau D, Devault A. Psychosocial factors associated with paternal postnatal depression. *Journal of Affective Disorders*. 2013;150(1):44-9.
7. Serhan N, Ege E, Ayranci U, Kosgeroglu N. Prevalence of postpartum depression in mothers and fathers and its correlates. *Journal of Clinical Nursing*. 2013;22(1-2):279-84.
8. Ngai FW, Ngu SF. Predictors of maternal and paternal depressive symptoms at postpartum. *Journal of Psychosomatic Research*. 2015;78(2):156-61.
9. Paulson JF, Bazemore SD. Prenatal and postpartum depression in fathers and its association with maternal depression: A meta-analysis. *JAMA*. 2010;303(19):1961-9.
10. Norhayati MN, Nik Hazlina NH, Asrenee AR, Wan Emilin WM. Magnitude and risk factors for postpartum symptoms: A literature review. *Journal of Affective Disorders*. 2014;175C:34-52.
11. McEwen BS. The neurobiology of stress: From serendipity to clinical relevance. *Brain Research*. 2000;886(1):172-89.
12. Opacka-Juffry J, Mohiyeddini C. Experience of stress in childhood negatively correlates with plasma oxytocin concentration in adult men. *Stress*. 2012;15(1):1-10.
13. Ikeda M, Hayashi M, Kamibeppu K. The relationship between attachment style and postpartum depression. *Attachment & Human development*. 2014;16(6):557-72.
14. Wee KY, Skouteris H, Pier C, Richardson B, Milgrom J. Correlates of ante- and postnatal depression in fathers: A systematic review. *Journal of Affective Disorders*. 2011;130(3):358-77.
15. Evans J, Heron J, Lewis G, Araya R, Wolke D. Negative self-schemas and the onset of depression in women: Longitudinal study. *British Journal of Psychiatry*. 2005;186:302-7.
16. Hipwell AE, Reynolds S, Pitts Crick E. Cognitive vulnerability to postnatal depressive symptomatology. *Journal of Reproductive and Infant Psychology*. 2004;22(3):211-27.
17. Barnum SE, Woody ML, Gibb BE. Predicting Changes in Depressive Symptoms from Pregnancy to Postpartum: The Role of Brooding Rumination and Negative Inferential Styles. *Cognitive Therapy and Research*. 2013;37(1):71-7.
18. Gotlib IH, Joormann J. Cognition and depression: Current status and future directions. *Annual Review of Clinical Psychology*. 2010;6:285.

19. Clark DA, Beck AT, Alford BA. Scientific foundations of cognitive theory and therapy of depression. New York, NY: John Wiley & Sons, Inc.; 1999.
20. Joormann J, Gotlib IH. Selective attention to emotional faces following recovery from depression. *Journal of Abnormal Psychology*. 2007;116(1):80.
21. Leppänen JM, Milders M, Bell JS, Terriere E, Hietanen JK. Depression biases the recognition of emotionally neutral faces. *Psychiatry research*. 2004;128(2):123-33.
22. Leyman L, De Raedt R, Schacht R, Koster EH. Attentional biases for angry faces in unipolar depression. *Psychological medicine*. 2007;37(03):393-402.
23. Surguladze SA, Young AW, Senior C, Brébion G, Travis MJ, Phillips ML. Recognition accuracy and response bias to happy and sad facial expressions in patients with major depression. *Neuropsychology*. 2004;18(2):212.
24. Joormann J, Gotlib IH. Is this happiness I see? Biases in the identification of emotional facial expressions in depression and social phobia. *Journal of abnormal psychology*. 2006;115(4):705.
25. Stein A, Arteche A, Lehtonen A, Craske M, Harvey A, Counsell N, et al. Interpretation of infant facial expression in the context of maternal postnatal depression. *Infant Behavior and Development*. 2010;33(3):273-8.
26. Arteche A, Joormann J, Harvey A, Craske M, Gotlib IH, Lehtonen A, et al. The effects of postnatal maternal depression and anxiety on the processing of infant faces. *Journal of affective disorders*. 2011;133(1):197-203.
27. Broth MR, Goodman SH, Hall C, Raynor LC. Depressed and well mothers' emotion interpretation accuracy and the quality of mother—infant interaction. *Infancy*. 2004;6(1):37-55.
28. Gil S, Teissèdre F, Chambres P, Droit-Volet S. The evaluation of emotional facial expressions in early postpartum depression mood: A difference between adult and baby faces? *Psychiatry Research*. 2011;186(2–3):281-6.
29. Nolen-Hoeksema S, Wisco BE, Lyubomirsky S. Rethinking rumination. *Perspectives on Psychological Science*. 2008;3(5):400-24.
30. Müller D, Teismann T, Havemann B, Michalak J, Seehagen S. Ruminative thinking as a predictor of perceived postpartum mother–infant bonding. *Cognitive Therapy and Research*. 2012;37(1):89-96.
31. Bistricky SL, Ingram RE, Atchley RA. Facial affect processing and depression susceptibility: Cognitive biases and cognitive neuroscience. *Psychological Bulletin* 2011;137(6):998-1028.
32. Field T. Postpartum depression effects on early interactions, parenting, and safety practices: A review. *Infant Behavior and Development*. 2010;33(1):1-6.
33. Feldman R, Granat A, Pariente C, Kanety H, Kuint J, Gilboa-Schechtman E. Maternal depression and anxiety across the postpartum year and infant social engagement, fear regulation, and stress reactivity. *Journal of the American Academy of Child & Adolescent Psychiatry*. 2009;48(9):919-27.
34. Parfitt Y, Pike A, Ayers S. The impact of parents' mental health on parent-baby interaction: A prospective study. *Infant Behavior and Development*. 2013;36(4):599-608.
35. Cummings EM, Davies PT. Maternal depression and child development. *Journal of Child Psychology and Psychiatry*. 1994;35(1):73-122.
36. Field T. Maternal depression effects on infants and early interventions. *Preventive medicine*. 1998;27(2):200-3.
37. Goodman SH, Gotlib IH. Risk for psychopathology in the children of depressed mothers: A developmental model for understanding mechanisms of transmission. *Psychological Review*. 1999;106(3):458.
38. Murray L, Cooper PJ. Effects of postnatal depression on infant development. *Archives of Disease in Childhood*. 1997;77(2):99-101.
39. Gelfand DM, Teti DM. The effects of maternal depression on children. *Clinical Psychology Review*. 1990;10(3):329-53.



- 1
- 2
- 3 40. Tronick E, Reck C. Infants of depressed mothers. *Harvard review of psychiatry*. 2009;17(2):147-56.
- 4
- 5 41. Kim P, Strathearn L, Swain JE. The maternal brain and its plasticity in humans. *Hormones and Behavior*. 2016;77:113-23.
- 6
- 7 42. Kingston D, Tough S, Whitfield H. Prenatal and postpartum maternal psychological distress and infant development: A systematic review. *Child Psychiatry & Human Development*. 2012;43(5):683-714.
- 8
- 9 43. Fonagy P, Steele M, Steele H, Moran GS, Higgitt AC. The capacity for understanding mental states: The reflective self in parent and child and its significance for security of attachment. *Infant Mental Health Journal*. 1991(12):201-18.
- 10
- 11 44. Slade A. Parental reflective functioning: An introduction. *Attachment & Human Development*. 2005;7(3):269-81.
- 12
- 13 45. Reck C, Hunt A, Fuchs T, Weiss R, Noon A, Moehler E, et al. Interactive regulation of affect in postpartum depressed mothers and their infants: an overview. *Psychopathology*. 2004;37(6):272-80.
- 14
- 15 46. Reck C, Noe D, Stefenelli U, Fuchs T, Cenciotti F, Stehle E, et al. Interactive coordination of currently depressed inpatient mothers and their infants during the postpartum period. *Infant Mental Health Journal*. 2011;32(5):542-62.
- 16
- 17 47. Fonagy P, Target M. Bridging the transmission gap: An end to an important mystery of attachment research? *Attachment & Human Development*. 2005;7(3):333-43.
- 18
- 19 48. Fonagy P, Gergely G, Jurist E, Target M. *Affect regulation, mentalization, and the development of the self*. New York: Other Press; 2002.
- 20
- 21 49. Muzik M, Bocknek EL, Broderick A, Richardson P, Rosenblum KL, Thelen K, et al. Mother–infant bonding impairment across the first 6 months postpartum: the primacy of psychopathology in women with childhood abuse and neglect histories. *Archives of Women's Mental Health*. 2013;16(1):29-38.
- 22
- 23 50. Fonagy P, Luyten P, Moulton-Perkins A, Lee Y-W, Warren F, Howard S, et al. Development and validation of a self-report measure of mentalizing: the Reflective Functioning Questionnaire. *PLoS One*. 2016;11(7):e0158678.
- 24
- 25 51. Verhage ML, Schuengel C, Madigan S, Fearon RMP, Oosterman M, Cassibba R, et al. Narrowing the transmission gap: A synthesis of three decades of research on intergenerational transmission of attachment. *Psychological Bulletin*. 2016;142(4):337-66.
- 26
- 27 52. Shah PE, Fonagy P, Strathearn L. Is attachment transmitted across generations? The plot thickens. *Clinical Child Psychology and Psychiatry* 2010;15(3):329-45.
- 28
- 29 53. Slade A, Grienenberger J, Bernbach E, Levy D, Locker A. Maternal reflective functioning, attachment, and the transmission gap: A preliminary study. *Attachment & Human Development*. 2005;7(3):283-98.
- 30
- 31 54. Beardslee W, Versage E, Gladstone T. Children of affectively ill parents: A review of the past 10 years. *Journal of the American Academy of Child and Adolescent Psychiatry*. 1998;37(11):1134-41.
- 32
- 33 55. Martins C, Gaffan EA. Effects of early maternal depression on patterns of infant–mother attachment: A meta-analytic investigation. *Journal of Child Psychology and Psychiatry*. 2000;41(06):737-46.
- 34
- 35 56. Murray L. The impact of postnatal depression on infant development. *Journal of Child Psychology and Psychiatry*. 1992;33(3):543-61.
- 36
- 37 57. Kelly K, Slade A, Grienenberger JF. Maternal reflective functioning, mother–infant affective communication, and infant attachment: Exploring the link between mental states and observed caregiving behavior in the intergenerational transmission of attachment. *Attachment & Human Development*. 2005;7(3):299-311.
- 38
- 39 58. Groh AM, Roisman GI, van Ijzendoorn MH, Bakermans-Kranenburg MJ, Fearon RP. The significance of insecure and disorganized attachment for children's internalizing symptoms: A meta-analytic study. *Child Development*. 2012;83(2):591-610.
- 40
- 41
- 42
- 43
- 44
- 45
- 46
- 47
- 48
- 49
- 50
- 51
- 52
- 53
- 54
- 55
- 56
- 57
- 58
- 59
- 60

- 1  
2  
3 59. van Ijzendoorn MH, Schuengel C, Bakermans-Kranenburg MJ. Disorganized  
4 attachment in early childhood: Meta-analysis of precursors, concomitants, and sequelae.  
5 *Development and Psychopathology*. 1999;11(02):225-50.
- 6 60. Hay DF, Pawlby S, Angold A, Harold GT, Sharp D. Pathways to violence in the  
7 children of mothers who were depressed postpartum. *Developmental Psychology*.  
8 2003;39(6):1083-94.
- 9 61. Kersten-Alvarez L, Hosman CH, Riksen-Walraven JM, van Doesum KM, Smeekens  
10 S, Hoefnagels C. Early school outcomes for children of postpartum depressed mothers:  
11 Comparison with a community sample. *Child Psychiatry & Human Development*.  
12 2012;43(2):201-18.
- 13 62. Murray L, Arteché A, Fearon P, Halligan S, Goodyer I, Cooper P. Maternal  
14 postnatal depression and the development of depression in offspring up to 16 years of  
15 age. *Journal of the American Academy of Child & Adolescent Psychiatry*.  
16 2011;50(5):460-70.
- 17 63. Bosquet Enlow M, King L, Schreier HMC, Howard JM, Rosenfield D, Ritz T, et al.  
18 Maternal sensitivity and infant autonomic and endocrine stress responses. *Early Human*  
19 *Development*. 2014;90(7):377-85.
- 20 64. Kaplan LA, Evans L, Monk C. Effects of mothers' prenatal psychiatric status and  
21 postnatal caregiving on infant biobehavioral regulation: Can prenatal programming be  
22 modified? *Early Human Development*. 2008;84(4):249-56.
- 23 65. Thayer JF, Åhs F, Fredrikson M, Sollers Iii JJ, Wager TD. A meta-analysis of heart  
24 rate variability and neuroimaging studies: Implications for heart rate variability as a  
25 marker of stress and health. *Neuroscience & Biobehavioral Reviews*. 2012;36(2):747-56.
- 26 66. Appelhans BM, Luecken LJ. Heart rate variability as an index of regulated  
27 emotional responding. *Review of General Psychology*. 2006;10(3):229-40.
- 28 67. Ramchandani P, Stein A, Evans J, O'Connor TG. Paternal depression in the  
29 postnatal period and child development: A prospective population study. *The Lancet*.  
30 2005;365(9478):2201-5.
- 31 68. Hanington L, Heron J, Stein A, Ramchandani P. Parental depression and child  
32 outcomes: Is marital conflict the missing link? *Child: Care, Health and Development*.  
33 2012;38(4):520-9.
- 34 69. Fletcher RJ, Feeman E, Garfield C, Vimpani G. The effects of early paternal  
35 depression on children's development. *The Medical Journal of Australia*. 2011;195(11-  
36 12):685-9.
- 37 70. Cramer B. Are postpartum depressions a mother-infant relationship disorder?  
38 *Infant Mental Health Journal*. 1993;14(4):283-97.
- 39 71. Nylen KJ, Moran TE, Franklin CL, O'Hara MW. Maternal depression: A review of  
40 relevant treatment approaches for mothers and infants. *Infant Mental Health Journal*.  
41 2006;27(4):327-43.
- 42 72. Paris R, Bolton RE, Spielman E. Evaluating a home-based dyadic intervention:  
43 Changes in postpartum depression, maternal perceptions, and mother-infant  
44 interactions. *Infant Mental Health Journal*. 2011;32(3):319-38.
- 45 73. Bauer A, Parsonage M, Knapp M, Iemmi V, Adelaja B. Costs of perinatal mental  
46 health problems. London, UK: London School of Economics and Political Science, 2014.
- 47 74. Nugent JK, Keefer CH, Minear S, Johnson LC, Blanchard Y. Understanding  
48 newborn behavior & early relationships: The Newborn Behavioral Observations (NBO)  
49 system handbook: Brookes Pub; 2007.
- 50 75. Sanders LW, Buckner EB. The Newborn Behavioral Observations System as a  
51 nursing intervention to enhance engagement in first-time mothers: Feasibility and  
52 desirability. *Pediatric nursing*. 2006;32(5):455.
- 53 76. McManus BM, Nugent JK. A neurobehavioral intervention incorporated into a  
54 state early intervention program is associated with higher perceived quality of care  
55 among parents of high-risk newborns. *The Journal of Behavioral Health Services &*  
56 *Research*. 2014;41(3):381-9.
- 57  
58  
59  
60

- 1  
2  
3 77. Nugent JK, Bartlett JD, Valim C. Effects of an infant-focused relationship-based  
4 hospital and home visiting intervention on reducing symptoms of postpartum maternal  
5 depression: A pilot study. *Infants & Young Children*. 2014;27(4):292-304.
- 6 78. Nicolson S, Judd F, Thomsson-Salo F, Mitchell S. Supporting the adolescent  
7 mother-infant relationship: Preliminary trial of a brief perinatal attachment  
8 intervention. *Archives of Women's Mental Health*. 2013;16(6):511-20.
- 9 79. Statistics Norway. Population and population changes, 1 January 2016:  
10 Estimated figures 2016 [Available from:  
11 <https://www.ssb.no/en/befolkning/statistikker/folkemengde/aar-berekna/2015-12-17>.  
12
- 13 80. The Little in Norway Study (LiN-study). A longitudinal population study of infant  
14 vulnerability and plasticity from pregnancy to age 18 months. The research Council of  
15 Norway. Project No.196156: 2010.
- 16 81. Bayley N. The screening test version of Bayley Scales of Infant and Toddler  
17 Development. 3rd ed. San Antonio: Harcourt Assessment; 2006.
- 18 82. Slinning K, Vannebo UT, Landsem I-P, Bøhle NC, Sandtrø H, Greve RA. Report by  
19 the Norway NBO trainer team Boston Children's Hospital; 2016 [Available from:  
20 <http://www.childrenshospital.org/research-and-innovation/research/centers/brazelton-institute/international/norway>.  
21
- 22 83. Nolen-Hoeksema S, Morrow J. A prospective study of depression and  
23 posttraumatic stress symptoms after a natural disaster: The 1989 Ioma prieta  
24 earthquake. *Journal of Personality and Social psychology*. 1991;61:115-21.
- 25 84. Ehring T, Zetsche U, Weidacker K, Wahl K, Schönfeld S, Ehlers A. The  
26 Perseverative Thinking Questionnaire (PTQ): Validation of a content-independent  
27 measure of repetitive negative thinking. *Journal of Behavior Therapy and Experimental  
28 Psychiatry*. 2011;42(2):225-32.
- 29 85. Young J. Young Schema Questionnaire-S3. Cognitive Therapy Center of New  
30 York. 2005.
- 31 86. Felitti VJ, Anda RF, Nordenberg D, Williamson DF, Spitz AM, Edwards V, et al.  
32 Relationship of childhood abuse and household dysfunction to many of the leading  
33 causes of death in adults: The Adverse Childhood Experiences (ACE) Study. *American  
34 Journal of Preventive Medicine*. 1998;14(4):245-58.
- 35 87. Fraley RC, Waller NG, Brennan KA. An item response theory analysis of self-  
36 report measures of adult attachment. *Journal of Personality and Social Psychology*.  
37 2000;78(2):350.
- 38 88. Condon JT. The assessment of antenatal emotional attachment: Development of  
39 a questionnaire instrument. *British Journal of Medical Psychology*. 1993;66(2):167-83.
- 40 89. Condon JT. The parental-foetal relationship: A comparison of male and female  
41 expectant parents. *Journal of Psychosomatic Obstetrics & Gynecology*. 1985;4(4):271-  
42 84.
- 43 90. Abidin RR. Parenting Stress Index (PSI): Pediatric Psychology Press; 1990.
- 44 91. Huizink AC, Mulder EJ, de Medina PGR, Visser GH, Buitelaar JK. Is pregnancy  
45 anxiety a distinctive syndrome? *Early human development*. 2004;79(2):81-91.
- 46 92. Russel M. New assessment tools for drinking in pregnancy: T-ACE, TWEAK, and  
47 others. *Alcohol Health and Research World*. 1994;18(1):55-61.
- 48 93. Webb R, Ayers S. Cognitive biases in processing infant emotion by women with  
49 depression, anxiety and post-traumatic stress disorder in pregnancy or after birth: A  
50 systematic review. *Cognition and Emotion*. 2014(ahead-of-print):1-17.
- 51 94. Rhodes MG, Anastasi JS. The own-age bias in face recognition: A meta-analytic  
52 and theoretical review. *Psychological Bulletin*. 2012;138(1):146-74.
- 53 95. Bohne A, Nordahl D, Lindahl ÅAW, Ulvenes P, Wang CEA, Pfuhl G. Is attention  
54 and memory towards infants preserved in patients with major depression? In prep.  
55  
56  
57  
58  
59  
60

- 1  
2  
3 96. Greenwald AG, McGhee DE, Schwartz JL. Measuring individual differences in  
4 implicit cognition: The implicit association test. *Journal of Personality and Social*  
5 *Psychology*. 1998;74(6):1464.
- 6 97. Gotlib IH, Kasch KL, Traill S, Joormann J, Arnow BA, Johnson SL. Coherence and  
7 specificity of information-processing biases in depression and social phobia. *Journal of*  
8 *Abnormal Psychology*. 2004;113(3):386.
- 9 98. Maack JK, Bohne A, Nordahl D, Livsdatter L, Lindahl Å, Øvervoll M, et al. The  
10 Tromsø Infant Faces Database (TIF): Development, validation and application to assess  
11 parenting experience on clarity and intensity ratings. *Frontiers in Psychology* 2017;8:1-  
12 13.
- 13 99. Clasen PC, Wells TT, Ellis AJ, Beevers CG. Attentional biases and the persistence  
14 of sad mood in major depressive disorder. *Journal of Abnormal Psychology*.  
15 2013;122(1):74-85.
- 16 100. Koster EHW, De Raedt R, Goeleven E, Franck E, Crombez G. Mood-congruent  
17 attentional bias in dysphoria: Maintained attention to and impaired disengagement from  
18 negative information. *Emotion*. 2005;5(4):446-55.
- 19 101. Cox JL, Holden JM, Sagovsky R. Detection of postnatal depression: Development  
20 of the 10-item Edinburgh Postnatal Depression Scale. *The British Journal of Psychiatry*.  
21 1987;150(6):782-6.
- 22 102. Eberhard-Gran A, Eskild K, Tambs B, Schei S, Opjordsmoen M. The Edinburgh  
23 Postnatal Depression Scale: Validation in a Norwegian community sample. *Nordic*  
24 *Journal of Psychiatry*. 2001;55(2):113-7.
- 25 103. Matthey S, Henshaw C, Elliott S, Barnett B. Variability in use of cut-off scores and  
26 formats on the Edinburgh Postnatal Depression Scale: Implications for clinical and  
27 research practice. *Archives of Women's Mental Health*. 2006;9(6):309-15.
- 28 104. Matthey S, Barnett B, Kavanagh DJ, Howie P. Validation of the Edinburgh  
29 Postnatal Depression Scale for men, and comparison of item endorsement with their  
30 partners. *Journal of Affective Disorders*. 2001;64(2-3):175-84.
- 31 105. Beck AT, Steer RA, Brown GK. BDI-II, Beck Depression Inventory: Manual. San  
32 Antonio, TX: The Psychological Corporation; 1996.
- 33 106. Diener E, Emmons RA, Larsen RJ, Griffin S. The Satisfaction With Life Scale.  
34 *Journal of Personality Assessment*. 1985;49:71-5.
- 35 107. European Social Survey. European Social Survey: Source questionnaire  
36 amendment 03 2008 [Available from:  
37 [http://survey.net.ac.uk/index/search1099/Ess/4732\\_2008-  
38 2009\\_quest\\_capi\\_papi\\_face\\_main.pdf#search=%22%22taking%20all%20t](http://survey.net.ac.uk/index/search1099/Ess/4732_2008-2009_quest_capi_papi_face_main.pdf#search=%22%22taking%20all%20t).  
39
- 40 108. Biringen Z, Derscheid D, Vliegen N, Closson L, Easterbrooks MA. Emotional  
41 availability (EA): Theoretical background, empirical research using the EA Scales, and  
42 clinical applications. *Developmental Review*. 2014;34(2):114-67.
- 43 109. Luyten P, Mayes L, Nijssens L. The Parental Reflective Functioning  
44 Questionnaire: Development, validation, and clinical application. *Infant Mental Health*  
45 *Journal*. 2011;31(3):109-.
- 46 110. Condon JT, Corkindale CJ. The assessment of parent-to-infant attachment:  
47 Development of a self-report questionnaire instrument. *Journal of Reproductive and*  
48 *Infant Psychology*. 1998;16(1):57-76.
- 49 111. Condon JT, Corkindale CJ, Boyce P. Assessment of postnatal paternal-infant  
50 attachment: Development of a questionnaire instrument. *Journal of Reproductive and*  
51 *Infant Psychology*. 2008;26(3):195-210.
- 52 112. Cameron JR, Rice DC. Developing anticipatory guidance programs based on early  
53 assessment of infant temperament: 2 tests of a prevention model. *Journal of Pediatric*  
54 *Psychology*. 1986;11:221-34.
- 55 113. Sarfi M, Martinsen H, Bakstad B, Røislien J, Waal H. Patterns in sleep-  
56 wakefulness in three-month old infants exposed to methadone or buprenorphine. *Early*  
57 *Human Development*. 2009;85(12):773-8.
- 58  
59  
60

- 1  
2  
3 114. Guedeney A, Fermanian J. A validity and reliability study of assessment and  
4 screening for sustained withdrawal reaction in infancy: The Alarm Distress Baby scale.  
5 Infant Mental Health Journal. 2001;22(5):559-75.  
6 115. Biopac Systems Inc. CA, USA 2015.  
7  
8  
9  
10  
11  
12  
13  
14  
15  
16  
17  
18  
19  
20  
21  
22  
23  
24  
25  
26  
27  
28  
29  
30  
31  
32  
33  
34  
35  
36  
37  
38  
39  
40  
41  
42  
43  
44  
45  
46  
47  
48  
49  
50  
51  
52  
53  
54  
55  
56  
57  
58  
59  
60

1  
2  
3  
4  
5  
6  
7  
8  
9  
10  
11  
12  
13  
14  
15  
16  
17  
18  
19  
20  
21  
22  
23  
24  
25  
26  
27  
28  
29  
30  
31  
32  
33  
34  
35  
36  
37  
38  
39  
40  
41  
42  
43  
44  
45  
46  
47  
48  
49  
50  
51  
52  
53  
54  
55  
56  
57  
58  
59  
60

Reporting guidelines

Dear editor,

since our manuscript presents both an observation study and an intervention study we found no reporting guidelines that satisfy both studies. Therefore we have tried to use both the SPIRIT guideline and the STROBE guideline.

For peer review only

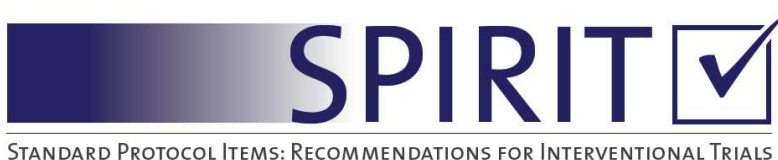

SPIRIT 2013 Checklist: Recommended items to address in a clinical trial protocol and related documents\*

| Section/item                      | Item No | Description                                                                                                  |
|-----------------------------------|---------|--------------------------------------------------------------------------------------------------------------|
| <b>Administrative information</b> |         |                                                                                                              |
| Title                             | 1       | Descriptive title identifying the study design, population, interventions, and, if applicable, trial acronym |
|                                   |         | - Information about study population is missing from the title                                               |
| Trial registration                | 2a      | Trial identifier and registry name. If not yet registered, name of intended registry.                        |
|                                   |         | - Page 2 in the manuscript                                                                                   |
|                                   | 2b      | All items from the World Health Organization Trial Registration Data Set                                     |
| Protocol version                  | 3       | Date and version identifier                                                                                  |
|                                   |         | - date found in header, version identifier is missing.                                                       |
| Funding                           | 4       | Sources and types of financial, material, and other support                                                  |
|                                   |         | - Page 15 in the manuscript                                                                                  |
| Roles and responsibilities        | 5a      | Names, affiliations, and roles of protocol contributors                                                      |
|                                   |         | - Page 15 in the manuscript                                                                                  |
|                                   | 5b      | Name and contact information for the trial sponsor                                                           |
|                                   |         | - Page 15 in the manuscript.                                                                                 |

1  
2  
3  
4  
5  
6  
7  
8  
9  
10  
11  
12  
13  
14  
15  
16  
17  
18  
19  
20  
21  
22  
23

5c Role of study sponsor and funders, if any, in study design; collection, management, analysis, and interpretation of data; writing of the report; and the decision to submit the report for publication, including whether they will have ultimate authority over any of these activities

- The study sponsor had no role in the study concept, design and implementation of the study; collection, management, preparation, review, or approval of the manuscript, or the decision to submit the manuscript for publication.

5d Composition, roles, and responsibilities of the coordinating centre, steering committee, endpoint adjudication committee, data management team, and other individuals or groups overseeing the trial, if applicable (see Item 21a for data monitoring committee)

- not relevant

## Introduction

24  
25  
26  
27  
28  
29  
30  
31  
32  
33  
34  
35  
36  
37  
38  
39  
40  
41  
42  
43  
44

Background and rationale 6a Description of research question and justification for undertaking the trial, including summary of relevant studies (published and unpublished) examining benefits and harms for each intervention

- Page 3 to 7 in the manuscript

6b Explanation for choice of comparators

- Missing in the manuscript

Objectives 7 Specific objectives or hypotheses

- Page 6 and 7 in the manuscript

45  
46  
47  
48  
49  
50  
51  
52

Trial design 8 Description of trial design including type of trial (eg, parallel group, crossover, factorial, single group), allocation ratio, and framework (eg, superiority, equivalence, noninferiority, exploratory)

- Page 7 in the manuscript

## Methods: Participants, interventions, and outcomes



|    |               |   |                                                                                                                                                                                    |
|----|---------------|---|------------------------------------------------------------------------------------------------------------------------------------------------------------------------------------|
| 1  |               |   |                                                                                                                                                                                    |
| 2  |               |   |                                                                                                                                                                                    |
| 3  |               |   |                                                                                                                                                                                    |
| 4  |               |   |                                                                                                                                                                                    |
| 5  |               |   |                                                                                                                                                                                    |
| 6  |               |   |                                                                                                                                                                                    |
| 7  |               |   |                                                                                                                                                                                    |
| 8  |               |   |                                                                                                                                                                                    |
| 9  |               |   |                                                                                                                                                                                    |
| 10 |               |   |                                                                                                                                                                                    |
| 11 | Study setting | 9 | Description of study settings (eg, community clinic, academic hospital) and list of countries where data will be collected. Reference to where list of study sites can be obtained |
| 12 |               |   |                                                                                                                                                                                    |
| 13 |               |   |                                                                                                                                                                                    |
| 14 |               |   |                                                                                                                                                                                    |
| 15 |               |   |                                                                                                                                                                                    |
| 16 |               |   |                                                                                                                                                                                    |
| 17 |               |   |                                                                                                                                                                                    |
| 18 |               |   |                                                                                                                                                                                    |
| 19 |               |   |                                                                                                                                                                                    |
| 20 |               |   |                                                                                                                                                                                    |
| 21 |               |   |                                                                                                                                                                                    |
| 22 |               |   |                                                                                                                                                                                    |
| 23 |               |   |                                                                                                                                                                                    |
| 24 |               |   |                                                                                                                                                                                    |
| 25 |               |   |                                                                                                                                                                                    |
| 26 |               |   |                                                                                                                                                                                    |
| 27 |               |   |                                                                                                                                                                                    |
| 28 |               |   |                                                                                                                                                                                    |
| 29 |               |   |                                                                                                                                                                                    |
| 30 |               |   |                                                                                                                                                                                    |
| 31 |               |   |                                                                                                                                                                                    |
| 32 |               |   |                                                                                                                                                                                    |
| 33 |               |   |                                                                                                                                                                                    |
| 34 |               |   |                                                                                                                                                                                    |
| 35 |               |   |                                                                                                                                                                                    |
| 36 |               |   |                                                                                                                                                                                    |
| 37 |               |   |                                                                                                                                                                                    |
| 38 |               |   |                                                                                                                                                                                    |
| 39 |               |   |                                                                                                                                                                                    |
| 40 |               |   |                                                                                                                                                                                    |
| 41 |               |   |                                                                                                                                                                                    |
| 42 |               |   |                                                                                                                                                                                    |
| 43 |               |   |                                                                                                                                                                                    |
| 44 |               |   |                                                                                                                                                                                    |
| 45 |               |   |                                                                                                                                                                                    |
| 46 |               |   |                                                                                                                                                                                    |
| 47 |               |   |                                                                                                                                                                                    |
| 48 |               |   |                                                                                                                                                                                    |
| 49 |               |   |                                                                                                                                                                                    |
| 50 |               |   |                                                                                                                                                                                    |
| 51 |               |   |                                                                                                                                                                                    |
| 52 |               |   |                                                                                                                                                                                    |
| 53 |               |   |                                                                                                                                                                                    |
| 54 |               |   |                                                                                                                                                                                    |
| 55 |               |   |                                                                                                                                                                                    |
| 56 |               |   |                                                                                                                                                                                    |
| 57 |               |   |                                                                                                                                                                                    |
| 58 |               |   |                                                                                                                                                                                    |
| 59 |               |   |                                                                                                                                                                                    |
| 60 |               |   |                                                                                                                                                                                    |

|    |             |    |                                                                      |
|----|-------------|----|----------------------------------------------------------------------|
| 1  |             |    |                                                                      |
| 2  | Participant | 13 | Time schedule of enrolment, interventions (including any run-ins and |
| 3  | timeline    |    | washouts), assessments, and visits for participants. A schematic     |
| 4  |             |    | diagram is highly recommended (see Figure)                           |
| 5  |             |    |                                                                      |
| 6  |             |    | - time schedule of enrolment presented on page 7. A figure for       |
| 7  |             |    | assessments at different time points is found on page 9.             |
| 8  |             |    |                                                                      |
| 9  | Sample size | 14 | Estimated number of participants needed to achieve study objectives  |
| 10 |             |    | and how it was determined, including clinical and statistical        |
| 11 |             |    | assumptions supporting any sample size calculations                  |
| 12 |             |    |                                                                      |
| 13 |             |    | - see page 8 for power calculations.                                 |
| 14 |             |    |                                                                      |
| 15 | Recruitment | 15 | Strategies for achieving adequate participant enrolment to reach     |
| 16 |             |    | target sample size                                                   |
| 17 |             |    |                                                                      |
| 18 |             |    | - Yes, see page 7 in the manuscript.                                 |
| 19 |             |    |                                                                      |
| 20 |             |    |                                                                      |
| 21 |             |    |                                                                      |

### Methods: Assignment of interventions (for controlled trials)

#### Allocation:

|    |                |     |                                                                         |
|----|----------------|-----|-------------------------------------------------------------------------|
| 25 |                |     |                                                                         |
| 26 | Sequence       | 16a | Method of generating the allocation sequence (eg, computer-             |
| 27 | generation     |     | generated random numbers), and list of any factors for stratification.  |
| 28 |                |     | To reduce predictability of a random sequence, details of any planned   |
| 29 |                |     | restriction (eg, blocking) should be provided in a separate document    |
| 30 |                |     | that is unavailable to those who enrol participants or assign           |
| 31 |                |     | interventions                                                           |
| 32 |                |     |                                                                         |
| 33 |                |     | - not relevant                                                          |
| 34 |                |     |                                                                         |
| 35 |                |     |                                                                         |
| 36 | Allocation     | 16b | Mechanism of implementing the allocation sequence (eg, central          |
| 37 | concealment    |     | telephone; sequentially numbered, opaque, sealed envelopes),            |
| 38 | mechanism      |     | describing any steps to conceal the sequence until interventions are    |
| 39 |                |     | assigned                                                                |
| 40 |                |     |                                                                         |
| 41 |                |     | - not relevant                                                          |
| 42 |                |     |                                                                         |
| 43 |                |     |                                                                         |
| 44 | Implementation | 16c | Who will generate the allocation sequence, who will enrol participants, |
| 45 |                |     | and who will assign participants to interventions                       |
| 46 |                |     |                                                                         |
| 47 |                |     | - not relevant                                                          |
| 48 |                |     |                                                                         |
| 49 | Blinding       | 17a | Who will be blinded after assignment to interventions (eg, trial        |
| 50 | (masking)      |     | participants, care providers, outcome assessors, data analysts), and    |
| 51 |                |     | how                                                                     |
| 52 |                |     |                                                                         |
| 53 |                |     | - not relevant                                                          |
| 54 |                |     |                                                                         |
| 55 |                |     |                                                                         |
| 56 |                |     |                                                                         |
| 57 |                |     |                                                                         |
| 58 |                |     |                                                                         |
| 59 |                |     |                                                                         |
| 60 |                |     |                                                                         |

1  
2  
3  
4  
5  
6  
7  
8  
9  
10  
11  
12  
13  
14  
15  
16  
17  
18  
19  
20  
21  
22  
23  
24  
25  
26  
27  
28  
29  
30  
31  
32  
33  
34  
35  
36  
37  
38  
39  
40  
41  
42  
43  
44  
45  
46  
47  
48  
49  
50  
51  
52  
53  
54  
55  
56  
57  
58  
59  
60

17b If blinded, circumstances under which unblinding is permissible, and procedure for revealing a participant's allocated intervention during the trial

- not relevant

### Methods: Data collection, management, and analysis

Data collection methods 18a Plans for assessment and collection of outcome, baseline, and other trial data, including any related processes to promote data quality (eg, duplicate measurements, training of assessors) and a description of study instruments (eg, questionnaires, laboratory tests) along with their reliability and validity, if known. Reference to where data collection forms can be found, if not in the protocol

- See figure page 9 for plans for assessment and collection of data. For further information about study instruments see page 10 to 13. Information about reliability and validity of study instruments is missing, as are reference to where data collection forms can be found.

18b Plans to promote participant retention and complete follow-up, including list of any outcome data to be collected for participants who discontinue or deviate from intervention protocols

- missing from the protocol

Data management 19 Plans for data entry, coding, security, and storage, including any related processes to promote data quality (eg, double data entry; range checks for data values). Reference to where details of data management procedures can be found, if not in the protocol

- see page 13

Statistical methods 20a Statistical methods for analysing primary and secondary outcomes. Reference to where other details of the statistical analysis plan can be found, if not in the protocol

- missing

20b Methods for any additional analyses (eg, subgroup and adjusted analyses)

- missing

20c Definition of analysis population relating to protocol non-adherence (eg, as randomised analysis), and any statistical methods to handle missing data (eg, multiple imputation)

- missing

**Methods: Monitoring**

- 1  
2  
3  
4  
5  
6  
7  
8  
9  
10  
11  
12  
13  
14  
15  
16  
17  
18  
19  
20  
21  
22  
23  
24  
25  
26  
27  
28  
29  
30  
31  
32  
33
- Data monitoring 21a Composition of data monitoring committee (DMC); summary of its role and reporting structure; statement of whether it is independent from the sponsor and competing interests; and reference to where further details about its charter can be found, if not in the protocol. Alternatively, an explanation of why a DMC is not needed
- not relevant
- 21b Description of any interim analyses and stopping guidelines, including who will have access to these interim results and make the final decision to terminate the trial
- missing from the protocol
- Harms 22 Plans for collecting, assessing, reporting, and managing solicited and spontaneously reported adverse events and other unintended effects of trial interventions or trial conduct
- see page 13 and 14 for information about plan for managing participants who are in need of more extensive services.
- Auditing 23 Frequency and procedures for auditing trial conduct, if any, and whether the process will be independent from investigators and the sponsor
- not relevant

**Ethics and dissemination**

- 34  
35  
36  
37  
38  
39  
40  
41  
42  
43  
44  
45  
46  
47  
48  
49  
50  
51  
52  
53  
54  
55  
56  
57  
58  
59  
60
- Research ethics approval 24 Plans for seeking research ethics committee/institutional review board (REC/IRB) approval
- The Regional Committee for Medical Research Ethics in Northern Norway have approved the project, see page 13.
- Protocol amendments 25 Plans for communicating important protocol modifications (eg, changes to eligibility criteria, outcomes, analyses) to relevant parties (eg, investigators, REC/IRBs, trial participants, trial registries, journals, regulators)
- missing from the manuscript
- Consent or assent 26a Who will obtain informed consent or assent from potential trial participants or authorised surrogates, and how (see Item 32)
- see page 7 and 8

|    |                               |     |                                                                                                                                                                                                                                                                                     |
|----|-------------------------------|-----|-------------------------------------------------------------------------------------------------------------------------------------------------------------------------------------------------------------------------------------------------------------------------------------|
| 1  |                               | 26b | Additional consent provisions for collection and use of participant data and biological specimens in ancillary studies, if applicable                                                                                                                                               |
| 2  |                               |     |                                                                                                                                                                                                                                                                                     |
| 3  |                               |     |                                                                                                                                                                                                                                                                                     |
| 4  |                               |     |                                                                                                                                                                                                                                                                                     |
| 5  |                               |     | - not relevant                                                                                                                                                                                                                                                                      |
| 6  |                               |     |                                                                                                                                                                                                                                                                                     |
| 7  | Confidentiality               | 27  | How personal information about potential and enrolled participants will be collected, shared, and maintained in order to protect confidentiality before, during, and after the trial                                                                                                |
| 8  |                               |     |                                                                                                                                                                                                                                                                                     |
| 9  |                               |     |                                                                                                                                                                                                                                                                                     |
| 10 |                               |     |                                                                                                                                                                                                                                                                                     |
| 11 |                               |     | - Yes, see page 13                                                                                                                                                                                                                                                                  |
| 12 |                               |     |                                                                                                                                                                                                                                                                                     |
| 13 |                               |     |                                                                                                                                                                                                                                                                                     |
| 14 | Declaration of interests      | 28  | Financial and other competing interests for principal investigators for the overall trial and each study site                                                                                                                                                                       |
| 15 |                               |     |                                                                                                                                                                                                                                                                                     |
| 16 |                               |     |                                                                                                                                                                                                                                                                                     |
| 17 |                               |     | - yes, see page 15                                                                                                                                                                                                                                                                  |
| 18 |                               |     |                                                                                                                                                                                                                                                                                     |
| 19 | Access to data                | 29  | Statement of who will have access to the final trial dataset, and disclosure of contractual agreements that limit such access for investigators                                                                                                                                     |
| 20 |                               |     |                                                                                                                                                                                                                                                                                     |
| 21 |                               |     |                                                                                                                                                                                                                                                                                     |
| 22 |                               |     |                                                                                                                                                                                                                                                                                     |
| 23 |                               |     |                                                                                                                                                                                                                                                                                     |
| 24 |                               |     | - see page 15                                                                                                                                                                                                                                                                       |
| 25 |                               |     |                                                                                                                                                                                                                                                                                     |
| 26 | Ancillary and post-trial care | 30  | Provisions, if any, for ancillary and post-trial care, and for compensation to those who suffer harm from trial participation                                                                                                                                                       |
| 27 |                               |     |                                                                                                                                                                                                                                                                                     |
| 28 |                               |     |                                                                                                                                                                                                                                                                                     |
| 29 |                               |     |                                                                                                                                                                                                                                                                                     |
| 30 |                               |     | - not relevant                                                                                                                                                                                                                                                                      |
| 31 |                               |     |                                                                                                                                                                                                                                                                                     |
| 32 | Dissemination policy          | 31a | Plans for investigators and sponsor to communicate trial results to participants, healthcare professionals, the public, and other relevant groups (eg, via publication, reporting in results databases, or other data sharing arrangements), including any publication restrictions |
| 33 |                               |     |                                                                                                                                                                                                                                                                                     |
| 34 |                               |     |                                                                                                                                                                                                                                                                                     |
| 35 |                               |     |                                                                                                                                                                                                                                                                                     |
| 36 |                               |     |                                                                                                                                                                                                                                                                                     |
| 37 |                               |     |                                                                                                                                                                                                                                                                                     |
| 38 |                               |     | - yes, see page 14                                                                                                                                                                                                                                                                  |
| 39 |                               |     |                                                                                                                                                                                                                                                                                     |
| 40 |                               | 31b | Authorship eligibility guidelines and any intended use of professional writers                                                                                                                                                                                                      |
| 41 |                               |     |                                                                                                                                                                                                                                                                                     |
| 42 |                               |     |                                                                                                                                                                                                                                                                                     |
| 43 |                               |     | - missing                                                                                                                                                                                                                                                                           |
| 44 |                               |     |                                                                                                                                                                                                                                                                                     |
| 45 |                               | 31c | Plans, if any, for granting public access to the full protocol, participant-level dataset, and statistical code                                                                                                                                                                     |
| 46 |                               |     |                                                                                                                                                                                                                                                                                     |
| 47 |                               |     |                                                                                                                                                                                                                                                                                     |
| 48 |                               |     |                                                                                                                                                                                                                                                                                     |
| 49 |                               |     | - missing                                                                                                                                                                                                                                                                           |
| 50 |                               |     |                                                                                                                                                                                                                                                                                     |
| 51 | <b>Appendices</b>             |     |                                                                                                                                                                                                                                                                                     |
| 52 |                               |     |                                                                                                                                                                                                                                                                                     |
| 53 | Informed consent materials    | 32  | Model consent form and other related documentation given to participants and authorised surrogates                                                                                                                                                                                  |
| 54 |                               |     |                                                                                                                                                                                                                                                                                     |
| 55 |                               |     |                                                                                                                                                                                                                                                                                     |
| 56 |                               |     |                                                                                                                                                                                                                                                                                     |
| 57 |                               |     | - missing                                                                                                                                                                                                                                                                           |
| 58 |                               |     |                                                                                                                                                                                                                                                                                     |
| 59 |                               |     |                                                                                                                                                                                                                                                                                     |
| 60 |                               |     |                                                                                                                                                                                                                                                                                     |

1  
2  
3  
4  
5  
6  
7  
8  
9  
10  
11  
12  
13  
14  
15  
16  
17  
18  
19  
20  
21  
22  
23  
24  
25  
26  
27  
28  
29  
30  
31  
32  
33  
34  
35  
36  
37  
38  
39  
40  
41  
42  
43  
44  
45  
46  
47  
48  
49  
50  
51  
52  
53  
54  
55  
56  
57  
58  
59  
60

Biological 33 Plans for collection, laboratory evaluation, and storage of biological specimens for genetic or molecular analysis in the current trial and for future use in ancillary studies, if applicable

- not relevant

---

\*It is strongly recommended that this checklist be read in conjunction with the SPIRIT 2013 Explanation & Elaboration for important clarification on the items. Amendments to the protocol should be tracked and dated. The SPIRIT checklist is copyrighted by the SPIRIT Group under the Creative Commons "[Attribution-NonCommercial-NoDerivs 3.0 Unported](https://creativecommons.org/licenses/by-nc-nd/3.0/)" license.

For peer review only

## STROBE Statement—checklist of items that should be included in reports of observational studies

|                              | Item No | Recommendation                                                                                                                                                                                                                                                                                                                                                                                                                                                                                                                                  |
|------------------------------|---------|-------------------------------------------------------------------------------------------------------------------------------------------------------------------------------------------------------------------------------------------------------------------------------------------------------------------------------------------------------------------------------------------------------------------------------------------------------------------------------------------------------------------------------------------------|
| <b>Title and abstract</b>    | 1       | (a) Indicate the study's design with a commonly used term in the title or the abstract<br>- Yes, page 1 in the manuscript<br><hr/> (b) Provide in the abstract an informative and balanced summary of what was done and what was found<br>- The abstract provides an informative summary of what we plan to do. The abstract is found in page 2 of the manuscript.                                                                                                                                                                              |
| <b>Introduction</b>          |         |                                                                                                                                                                                                                                                                                                                                                                                                                                                                                                                                                 |
| Background/rationale         | 2       | Explain the scientific background and rationale for the investigation being reported<br>- Page 3 to 6 in the manuscript                                                                                                                                                                                                                                                                                                                                                                                                                         |
| Objectives                   | 3       | State specific objectives, including any prespecified hypotheses<br>- Page 6 and 7 in the manuscript                                                                                                                                                                                                                                                                                                                                                                                                                                            |
| <b>Methods</b>               |         |                                                                                                                                                                                                                                                                                                                                                                                                                                                                                                                                                 |
| Study design                 | 4       | Present key elements of study design early in the paper<br>- Yes, key elements of study design are presented early in the method section. Page 7.                                                                                                                                                                                                                                                                                                                                                                                               |
| Setting                      | 5       | Describe the setting, locations, and relevant dates, including periods of recruitment, exposure, follow-up, and data collection<br>- Yes, found in pages 7 to 10 of the manuscript.                                                                                                                                                                                                                                                                                                                                                             |
| Participants                 | 6       | (a) <i>Cohort study</i> —Give the eligibility criteria, and the sources and methods of selection of participants. Describe methods of follow-up<br>- Eligibility criteria, and sources and methods of selection of participants are found in pages 7 and 8 of the manuscript<br><hr/> (b) <i>Cohort study</i> —For matched studies, give matching criteria and number of exposed and unexposed<br>- not relevant<br><i>Case-control study</i> —For matched studies, give matching criteria and the number of controls per case<br>-not relevant |
| Variables                    | 7       | Clearly define all outcomes, exposures, predictors, potential confounders, and effect modifiers. Give diagnostic criteria, if applicable<br>- Partly missing, but see page 10 to 13 for information about outcomes and predictors.                                                                                                                                                                                                                                                                                                              |
| Data sources/<br>measurement | 8*      | For each variable of interest, give sources of data and details of methods of assessment (measurement). Describe comparability of assessment methods if there is more than one group                                                                                                                                                                                                                                                                                                                                                            |
| Bias                         | 9       | Describe any efforts to address potential sources of bias<br>- Missing in the manuscript                                                                                                                                                                                                                                                                                                                                                                                                                                                        |
| Study size                   | 10      | Explain how the study size was arrived at<br>- Page 8 in the manuscript                                                                                                                                                                                                                                                                                                                                                                                                                                                                         |
| Quantitative variables       | 11      | Explain how quantitative variables were handled in the analyses. If applicable, describe which groupings were chosen and why<br>- Not relevant, since this is a study protocol article                                                                                                                                                                                                                                                                                                                                                          |

1  
2 Statistical methods

12 (a) Describe all statistical methods, including those used to control for confounding

- Missing in the manuscript

---

(b) Describe any methods used to examine subgroups and interactions

- Missing in the manuscript

---

(c) Explain how missing data were addressed

- Missing in the manuscript

---

(d) *Cohort study*—If applicable, explain how loss to follow-up was addressed

- Missing in the manuscript

*Case-control study*—If applicable, explain how matching of cases and controls was addressed

- not relevant

*Cross-sectional study*—If applicable, describe analytical methods taking account of sampling strategy

- not relevant

---

(e) Describe any sensitivity analyses

- missing

Continued on next page

3  
4  
5  
6  
7  
8  
9  
10  
11  
12  
13  
14  
15  
16  
17  
18  
19  
20  
21  
22  
23  
24  
25  
26  
27  
28  
29  
30  
31  
32  
33  
34  
35  
36  
37  
38  
39  
40  
41  
42  
43  
44  
45  
46  
47  
48  
49  
50  
51  
52  
53  
54  
55  
56  
57  
58  
59  
60

For peer review only



**Results**

|                   |     |                                                                                                                                                                                                                                |
|-------------------|-----|--------------------------------------------------------------------------------------------------------------------------------------------------------------------------------------------------------------------------------|
| Participants      | 13* | (a) Report numbers of individuals at each stage of study—eg numbers potentially eligible, examined for eligibility, confirmed eligible, included in the study, completing follow-up, and analysed<br>- not relevant            |
|                   |     | (b) Give reasons for non-participation at each stage<br>- not relevant                                                                                                                                                         |
|                   |     | (c) Consider use of a flow diagram<br>- not relevant                                                                                                                                                                           |
| Descriptive data  | 14* | (a) Give characteristics of study participants (eg demographic, clinical, social) and information on exposures and potential confounders<br>- Not relevant                                                                     |
|                   |     | (b) Indicate number of participants with missing data for each variable of interest<br>- Not relevant                                                                                                                          |
|                   |     | (c) <i>Cohort study</i> —Summarise follow-up time (eg, average and total amount)<br>- Not relevant                                                                                                                             |
| Outcome data      | 15* | <i>Cohort study</i> —Report numbers of outcome events or summary measures over time<br>- Not relevant                                                                                                                          |
|                   |     | <i>Case-control study</i> —Report numbers in each exposure category, or summary measures of exposure<br>- not relevant                                                                                                         |
|                   |     | <i>Cross-sectional study</i> —Report numbers of outcome events or summary measures<br>- not relevant                                                                                                                           |
| Main results      | 16  | (a) Give unadjusted estimates and, if applicable, confounder-adjusted estimates and their precision (eg, 95% confidence interval). Make clear which confounders were adjusted for and why they were included<br>- Not relevant |
|                   |     | (b) Report category boundaries when continuous variables were categorized<br>- Not relevant                                                                                                                                    |
|                   |     | (c) If relevant, consider translating estimates of relative risk into absolute risk for a meaningful time period<br>- Not relevant                                                                                             |
| Other analyses    | 17  | Report other analyses done—eg analyses of subgroups and interactions, and sensitivity analyses<br>- Not relevant.                                                                                                              |
| <b>Discussion</b> |     |                                                                                                                                                                                                                                |
| Key results       | 18  | Summarise key results with reference to study objectives<br>- not relevant                                                                                                                                                     |
| Limitations       | 19  | Discuss limitations of the study, taking into account sources of potential bias or imprecision. Discuss both direction and magnitude of any potential bias<br>-not relevant                                                    |
| Interpretation    | 20  | Give a cautious overall interpretation of results considering objectives, limitations, multiplicity of analyses, results from similar studies, and other relevant evidence<br>-not relevant                                    |
| Generalisability  | 21  | Discuss the generalisability (external validity) of the study results<br>- not relevant                                                                                                                                        |

**Other information**

---

Funding 22 Give the source of funding and the role of the funders for the present study and, if applicable, for the original study on which the present article is based  
- Yes, found in page 15 in the manuscript

\*Give information separately for cases and controls in case-control studies and, if applicable, for exposed and unexposed groups in cohort and cross-sectional studies.

**Note:** An Explanation and Elaboration article discusses each checklist item and gives methodological background and published examples of transparent reporting. The STROBE checklist is best used in conjunction with this article (freely available on the Web sites of PLoS Medicine at <http://www.plosmedicine.org/>, Annals of Internal Medicine at <http://www.annals.org/>, and Epidemiology at <http://www.epidem.com/>). Information on the STROBE Initiative is available at [www.strobe-statement.org](http://www.strobe-statement.org).

# BMJ Open

## Protocol for the Northern Babies longitudinal study: Predicting postpartum depression and improving parent- infant interaction with The Newborn Behavioral Observation

|                                 |                                                                                                                                                                                                                                                                                                                                                                                                                                                                                                                                                                                                                                                                                                                                                                                                                                                                                                                                                                                                                                                                 |
|---------------------------------|-----------------------------------------------------------------------------------------------------------------------------------------------------------------------------------------------------------------------------------------------------------------------------------------------------------------------------------------------------------------------------------------------------------------------------------------------------------------------------------------------------------------------------------------------------------------------------------------------------------------------------------------------------------------------------------------------------------------------------------------------------------------------------------------------------------------------------------------------------------------------------------------------------------------------------------------------------------------------------------------------------------------------------------------------------------------|
| Journal:                        | <i>BMJ Open</i>                                                                                                                                                                                                                                                                                                                                                                                                                                                                                                                                                                                                                                                                                                                                                                                                                                                                                                                                                                                                                                                 |
| Manuscript ID                   | bmjopen-2017-016005.R2                                                                                                                                                                                                                                                                                                                                                                                                                                                                                                                                                                                                                                                                                                                                                                                                                                                                                                                                                                                                                                          |
| Article Type:                   | Protocol                                                                                                                                                                                                                                                                                                                                                                                                                                                                                                                                                                                                                                                                                                                                                                                                                                                                                                                                                                                                                                                        |
| Date Submitted by the Author:   | 29-Jun-2017                                                                                                                                                                                                                                                                                                                                                                                                                                                                                                                                                                                                                                                                                                                                                                                                                                                                                                                                                                                                                                                     |
| Complete List of Authors:       | <p>Hoifodt, Ragnhild Sorensen; UiT The Arctic University of Norway, Department of Psychology; University Hospital of North Norway, Division of Mental Health and Addiction</p> <p>Nordahl, Dag; UiT The Arctic University of Norway, Department of Psychology; University Hospital of North Norway, Division of Child and Adolescent Health</p> <p>Pfuhl, Gerit ; UiT The Arctic University of Norway, Department of Psychology; Norwegian University of Science and Technology, Department of Psychology</p> <p>Landsem, Inger ; UiT The Arctic University of Norway, Department of Health and Care Sciences; University Hospital of North Norway, Division of Child and Adolescent Health</p> <p>Thimm, Jens; UiT The Arctic University of Norway, Department of Psychology</p> <p>Ilstad, Linn Kathrin; University Hospital of North Norway, Division of Mental Health and Addiction</p> <p>Wang, Catharina; UiT The Arctic University of Norway, Department of Psychology; University Hospital of North Norway, Division of Child and Adolescent Health</p> |
| <b>Primary Subject Heading</b>: | Mental health                                                                                                                                                                                                                                                                                                                                                                                                                                                                                                                                                                                                                                                                                                                                                                                                                                                                                                                                                                                                                                                   |
| Secondary Subject Heading:      | General practice / Family practice, Mental health, Nursing, Health services research                                                                                                                                                                                                                                                                                                                                                                                                                                                                                                                                                                                                                                                                                                                                                                                                                                                                                                                                                                            |
| Keywords:                       | Child & adolescent psychiatry < PSYCHIATRY, Depression & mood disorders < PSYCHIATRY, MENTAL HEALTH                                                                                                                                                                                                                                                                                                                                                                                                                                                                                                                                                                                                                                                                                                                                                                                                                                                                                                                                                             |
|                                 |                                                                                                                                                                                                                                                                                                                                                                                                                                                                                                                                                                                                                                                                                                                                                                                                                                                                                                                                                                                                                                                                 |

SCHOLARONE™  
Manuscripts

1  
2  
3  
4  
5  
6 Title:

7  
8 Protocol for the Northern Babies longitudinal study: Predicting postpartum depression  
9 and improving parent-infant interaction with The Newborn Behavioral Observation  
10  
11

12  
13  
14 Research protocol of

15  
16  
17  
18 Ragnhild Sørensen Høifødt\*<sup>1,2</sup> Dag Nordahl\*<sup>1,3</sup>,

19  
20 Gerit Pfuhl<sup>1,4</sup>, Inger Pauline Landsem<sup>3,5</sup>, Jens C. Thimm<sup>1</sup>, Linn Kathrin K. Ilstad<sup>2</sup>

21  
22 Catharina Elisabeth Arfwedson Wang<sup>1</sup>  
23  
24

25 \*These authors contributed equally  
26  
27  
28  
29

30 <sup>1</sup>Department of Psychology, Faculty of Health Sciences, UiT The Arctic University of Norway,  
31 Tromsø, Norway  
32

33 <sup>2</sup>Division of Mental Health and Addiction, University Hospital of North Norway, Tromsø, Norway  
34

35 <sup>3</sup>Division of Child and Adolescent Health, University Hospital of Northern Norway, Tromsø, Norway  
36

37 <sup>4</sup>Department of Psychology, Norwegian University of Science and Technology, Trondheim, Norway  
38

39 <sup>5</sup>Department of Health and Care Sciences, Faculty of Health Sciences, UiT The Arctic University of  
40 Norway, Tromsø, Norway  
41  
42  
43  
44

45 Corresponding author:

46  
47 Dag Nordahl, Department of Psychology, Faculty of Health Sciences, UiT Arctic

48  
49 University of Norway, 9037 Tromsø, Norway. Telephone: +47 77645807, Fax: +47

50  
51 77645291. E-mail: dag.nordahl@uit.no.  
52  
53  
54  
55

56 Word count: 4375  
57  
58  
59  
60

## Abstract

### Introduction

Postpartum depression (PPD) is a prevalent disorder. Studying the factors related to PPD will help to identify families at risk and provide preventive interventions. This can in turn improve the developmental trajectories for the children. Several previous studies have investigated risk factors for PPD. However, few studies have focused on cognitive vulnerability factors. The first aim of the present study is to explore a range of protective and risk factors, including cognitive factors, for PPD, parent-infant interactions and child development. The second aim of the study is to evaluate the effectiveness of The Newborn Behavioral Observation (NBO) as a universal preventive intervention delivered in routine practice. The NBO is a brief relationship-enhancing intervention that may reduce depressive symptomatology in mothers.

### Methods

The study is a longitudinal observational study with an intervention. The observational study uses a prospective cohort design, whereas the intervention-study has a non-randomized cluster controlled design comparing a group receiving NBO with a group receiving standard care. The intervention group will receive three NBO-sessions within the first four weeks post-delivery. Between 2015 and 2018 approximately 200 families will be recruited in the municipality of Tromsø, Norway. Parents are recruited during pregnancy, and assessments will be performed during gestational week 16 – 22, 24 – 30 and 31, and at 6 weeks, 4 months and 6 months post-delivery. Predictor variables include several cognitive vulnerability factors including early maladaptive schemas, implicit attitudes and cognitive processing of emotionally valenced infant facial information.

### Ethics and dissemination

The Regional Committee for Medical and Health Research Ethics in Northern Norway has approved the project. The research team has collaboration with local health services, and can assist participants who need more extensive follow-up. Results from the project will be disseminated in international and national peer-reviewed journals, and at courses and conferences.

**Trials registration number:** NCT02538497

### Strengths and limitations of this study

- This study will provide new knowledge about cognitive vulnerability and protective factors associated by postpartum depression, parent-infant interaction, and child development.
- The study is the first to examine the effect of Newborn Behavioral Observation (NBO), a brief relationship enhancing parent-infant intervention, delivered as a universal preventive intervention both for postpartum depression and for parent-infant interaction difficulties.
- Mothers, infants and fathers are followed through 6 assessments; from gestational week 16-22 until 6 months post-delivery.
- A limitation of the study is that the participants are not randomly assigned to the intervention and control group, respectively.
- Further limitations are that depression is measured by self-report questionnaires only, and that potentially important factors such as parental personality and other mental health variables, e.g., anxiety and Post Traumatic Stress Disorder (PTSD) symptoms, are not included.

The transition into parenthood is a period with great biological and psychosocial changes, and is associated with an elevated risk for depressed mood for both mothers and fathers (1). The prevalence of postpartum depression (PPD) is between 10 % and 15% for women (2, 3), and between 5 % and 10 % for men (1, 4-9). However, a meta-analysis suggested the rate in men may be as high as 25 % in the period between 3- and 6-months postpartum (9).

Important risk factors for developing maternal PPD include antenatal depression and anxiety, previous psychiatric illness, a poor marital relationship, life stressors, a negative attitude towards pregnancy and lack of social support (10). Adverse childhood experiences are in general considered a risk for depression (11) and stress (12) in adulthood. In addition, an insecure adult attachment style is shown to be related to maternal PPD (13). Paternal PPD shares many of the same risk factors as maternal PPD (5, 6). However, the most common correlate for paternal postpartum depression is having a depressed partner (8, 14). Thus, depression in one parent increases the risk for couple comorbidity where both parents become depressed.

## Cognition in PPD

Parents' ability to cope with and relate to this transitional period can be assessed by measuring their cognitive schemas and information processing. Cognition may have an important role in the development of maternal PPD and may affect the quality of mother-infant interactions. In fact, cognitive factors such as negative self-schemas (15), antenatal self-devaluating tendencies, a lack of specificity in autobiographical retrieval (16), brooding rumination and negative inferential styles (17) have been found to be predictive of depressive symptoms after childbirth.

Further, depression is characterized by impairments and deviations from normal functioning across a broad range of cognitive domains, e.g., attention, attitudes, memory (18, 19). For instance, there is support for a depression related bias for processing of facial information (20-24). Research suggests that mothers with symptoms of PPD rate negative infant faces more negatively compared to non-depressed mothers (25). Also, mothers with PPD may less accurately identify happy infant faces compared to healthy controls (26), and lower accuracy may be associated with higher levels of maternal depression (27). Gil, Teissèdre, Chambres and Droit-Voilet (28) found that judgment of facial expressions depended largely on anxiety, but intensity of depressed mood was correlated to judging infant faces as less neutral. Still, research on cognitive biases for facial information in PPD is limited.

The cognitive mechanisms that may mediate the effect of PPD on parenting are not well understood. Rumination in depressed mothers is associated with difficulties in the mother-infant relationship, probably because the depressed mother's focus is mostly on herself and not on the needs of the child (29). Müller, Teismann, Havemann, Michalak and Seehagen (30) also found that maternal rumination in pregnancy was related to an impaired mother-infant relationship postpartum. In addition, parents processing of infants facial expression is indicated to have an important role for attunement, emotional attachment, and emotional regulation (31).

## Impact of PPD on parent-infant interaction

1  
2  
3 Parental psychopathology such as depression and anxiety may interfere with  
4 the parent-infant relationship (32, 33). This pertains not only to postnatal mental  
5 health, but also psychopathology in the antenatal period. In fact, a study by Parfitt,  
6 Pike and Ayers (34) indicated that prenatal mental health, especially anxiety, was  
7 related to parent-infant interaction to a greater extent than postnatal measures.  
8  
9

10  
11 Although a range of mental health issues are related to parental-child  
12 outcomes, the focus of this study will mainly be on depression. Maternal depression  
13 may interfere with healthy interactions with the infant by reducing the mother's  
14 ability to be sensitively attuned and responsive to her infant's signals and needs (35-  
15 38). Depressed mothers may also show a more negative (hostile and intrusive) and  
16 less responsive parenting style (39). Furthermore, they may touch and talk less with  
17 their infant and may show more negative facial expressions during face-to-face-  
18 interaction (40).  
19  
20

21  
22 Emerging research on the maternal brain and hormones shows that processes  
23 underlying parent-infant relationships and parental sensitivity are complex and  
24 include markers related to PPD and exposure to childhood adversity (see 41 for a  
25 review). There is indication that mothers with depression tend to have poorer  
26 mentalization skills (42). Mentalization can be defined as the capacity to understand  
27 the behavior of oneself and others in terms of underlying mental states and intentions  
28 (43), whereas reflective functioning is described as an overt manifestation of the  
29 capacity to mentalize (44). Depressed mothers may have difficulty reading the  
30 affective communication of the infant and responding appropriately (40).  
31 Accordingly, the ability for affect regulation and interactive coordination is impaired  
32 (45, 46). The capacity to mentalize develops through a child's social interaction with  
33 a caregiver who has the ability to understand the child as an individual with a mind  
34 (47). Thus, a parent's own unresolved adverse childhood experiences might both  
35 increase the risk of psychopathology, as well as impact on their own capacity for  
36 reflective functioning and ability to bond (44, 48, 49). Parental reflective functioning  
37 may further be related to infant attachment (50). A recent meta-analysis (51) supports  
38 the existence of an intergenerational transmission of attachment patterns, but  
39 concludes that caregiver sensitivity cannot fully explain the transmission and that  
40 other moderators are not fully understood. This picture is further complicated by  
41 studies suggesting that insecure ambivalent infants often have insecure avoidant  
42  
43  
44  
45  
46  
47  
48  
49  
50  
51  
52  
53  
54  
55  
56  
57  
58  
59  
60



1  
2  
3 mothers and the other way around (52). Studies suggest that parental reflective  
4 functioning may be one factor in the intergenerational transmission of attachment  
5 patterns (53).  
6  
7

### 8 9 **Consequences for the child**

10  
11 It is well-documented that maternal depression has an adverse effect on the  
12 child's development (40, 54). Children of depressed mothers are more likely to have  
13 cognitive, behavioural, emotional, and attachment difficulties in childhood (55, 56).  
14 Disrupted maternal affective communication is linked with attachment  
15 disorganization (57). Disorganized attachment is overrepresented in children of  
16 depressed mothers (55), and is associated with internalizing and externalizing  
17 behavior problems (58, 59). The risk for adverse outcomes such as poorer school  
18 adjustment, lower peer social competence, and an increased risk for depression persist  
19 into later childhood and adolescence (60-62).  
20  
21  
22  
23  
24  
25

26  
27 Maternal insensitivity can also influence infant stress-related physiology, as  
28 shown by greater activation of the autonomic nervous system (63, 64). Infants of  
29 more sensitive mothers show higher resting heart rate variability (HRV) compared to  
30 infants of less sensitive mothers (64). Heart rate variability is proposed as a marker  
31 for stress and health (65). Higher HRV is associated with more adaptive coping and  
32 emotion regulation, and lower HRV is related to negative outcomes such as  
33 depression and anxiety implicating emotional dysregulation (66).  
34  
35  
36  
37  
38

39  
40 Paternal PPD also has important implications. Studies show that even after  
41 controlling for maternal depression, depression in fathers in the pre- and postnatal  
42 period is related to negative social, emotional and behavioral outcomes for the child  
43 up to 7 years of age (4, 67-69). Some studies suggest that postpartum depression in  
44 fathers may be especially associated with an increased risk for oppositional defiant  
45 and conduct disorders in boys (4, 67).  
46  
47  
48  
49  
50

### 51 52 **Prevention and Treatment of PPD**

53  
54 PPD in mothers can be conceptualized as a mother-infant relationship disorder  
55 (70). Thus, interventions improving parent-infant interactions can potentially improve  
56 and prevent maternal PPD, as well as improve the trajectories for the children (71,  
57  
58  
59  
60

72). Such preventive efforts could have important societal implications. A recent report lists the high level of costs associated with maternal perinatal health problems (73), and concludes that even modest improvements in outcomes as a result of better services would benefit society.

One such relationship-enhancing intervention is The Newborn Behavioral Observation (NBO; 74). The NBO is a brief, low-cost intervention that can be used in a range of settings (75). The intervention can be delivered from around the time of birth, and it is compatible with the regular practice of public health nurses in Norway, and has been implemented as standard care in several regions. The goal of NBO is to sensitize parents to their infant's competencies and to how the newborn baby communicates through body signs, movements, state regulation, and responsivity (74). Enhanced understanding of how to "read the baby" can contribute to the development of a positive parent-infant relationship. Compared to usual care NBO has been found to be related to higher perceived parent- infant interaction quality among parents of high-risk infants (76). In addition, results from a pilot study indicated that delivering NBO as a universal preventive intervention can be related to lower depressive symptomatology in first-time mothers (77). By increasing parental sensitivity, the intervention also has the potential to positively affect biomarkers related to infant stress, as indicated by previous studies of attachment-based interventions (78). However, research on the effect of NBO as a preventive intervention is scarce, and there is a need for more studies.

## Aims

The present study has three broad aims:

- 1) *Examine key pre- and postnatal predictors related to parental functioning:* a) parental depression, anxiety, and stress, b) parental reflective functioning in relation to the infant, and c) parent-infant attachment style.
- 2) *Examine key pre- and postnatal predictors related to interaction and developmental problems in the child:* a) difficulties in mother-infant interaction in the first 4 months post-delivery, and b) infant's cognitive, communicative and motor development, signs of sustained withdrawal behaviour, and heart-rate variability at 6 months post-delivery.

1  
2  
3 3) *Evaluate the effectiveness of the NBO as a universal preventive intervention*  
4 delivered in routine practice as compared to standard care, on:

- 5  
6  
7 - Parental outcomes (depressive symptoms, parenting stress, reflective  
8 functioning, attachment to the infant),  
9  
10  
11 - Relational outcomes (emotional availability in mother-child interaction), and  
12  
13 - Infant outcomes (cognitive, communicative and motor development at 6  
14 months post-delivery, heart-rate variability).  
15  
16

17 Predictor variables include some well-known vulnerability factors for  
18 developing PPD (e.g., depression symptoms in pregnancy, adult attachment style,  
19 relationship satisfaction and life stress), but the main focus in the observational part of  
20 the research project is on cognitive vulnerability factors such as early maladaptive  
21 schemas, repetitive negative thinking, rumination, implicit attitudes and cognitive  
22 processing of emotionally valenced infant facial information.  
23  
24  
25  
26  
27  
28  
29  
30

## 31 **Methods**

### 32 **Study design**

33  
34  
35 This is a longitudinal observational study with an intervention. The  
36 observational part of the study will use a prospective cohort design. The effect of the  
37 intervention will be evaluated using a non-randomized cluster controlled design, since  
38 neither cluster nor individual randomization is feasible in this routine practice setting.  
39 An intervention group receiving NBO (families belonging to two well-baby clinics in  
40 Tromsø municipality) will be compared with a control group (families at the  
41 remaining four well-baby clinics in Tromsø) receiving care as usual.  
42  
43  
44  
45  
46  
47  
48  
49

### 50 **Recruitment**

51  
52 All pregnant women and expecting fathers who speak Norwegian are eligible  
53 for inclusion in the study. Between autumn 2015 and autumn 2018 approximately 200  
54 families will be recruited by midwives and by general practitioners (GPs) in the  
55 municipality of Tromsø, which is the 9th largest municipality in Norway (~73000  
56  
57  
58  
59  
60

1  
2  
3 inhabitants; 79). There are approximately 1000 births a year in Tromsø municipality.  
4 Based on the experiences from a comparable study, “Little in Norway” (80), the  
5 recruitment of 200 families within the project period is considered feasible.  
6  
7

8  
9 The participants will be recruited in (approximately) week 16 of gestation. At  
10 recruitment, women will be given written information about the study and a flyer with  
11 an inquiry to be contacted by the research team. If the child’s father is not present, the  
12 mother is encouraged to inform him about the study. The health worker informs the  
13 research team who contacts the women to plan a meeting with them and their  
14 partners, preferable between week 16 and 22 of gestation. In this meeting, the  
15 prospective parents are given detailed information about the study and are invited to  
16 sign an informed consent to participate. In addition, at 4 months post-delivery the  
17 parents will be asked to sign an informed consent to obtain birth related information  
18 from the birth record.  
19  
20  
21  
22  
23  
24  
25  
26  
27

### 28 **Power calculations/statistical analysis**

29  
30 The sample size is calculated on the basis of differences between intervention  
31 group and standard care group on the Edinburgh Postnatal Depression Scale (EPDS)  
32 maternal score, the *Parenting Stress Index* (PSI-PD), the *Parental Reflective*  
33 *Functioning Scale* (PRFQ) and the *Maternal Postnatal Attachment Scale* (MPAS) 6  
34 weeks post-delivery. Based on the pilot study by Nugent et al. (77) and some  
35 regression to the mean, we expect a small to medium effect size ( $f^2 = .07$ ). A  
36 MANOVA with the four aforementioned outcome variables can detect a difference  
37 between the groups with a power of .80 given a group size of  $N = 176$ . With an  
38 estimated dropout of 10 %, a group size of 200 women will be recruited. Sample size  
39 is not based on the number of men recruited, as their allocation to the two groups is  
40 less predictable than for mothers. The estimation is based on an  $\alpha$ -level of .05.  
41  
42  
43  
44  
45  
46  
47  
48  
49  
50

### 51 **Procedure**

52 For the observational part of the study, assessments will be performed at six  
53 time points (T; see Table 1): During gestational week 16 – 22 (T1), 24 – 30 (T2) and  
54 31 (T3), and at 6 weeks (T4), 4 months (T5) and 6 months (T6) post-delivery. For the  
55  
56  
57  
58  
59  
60

1  
2  
3 intervention study, pre-intervention measures will be collected at T3, post-  
4 intervention measures at T4 and follow-up measures at T5 and T6. Since the families  
5 will receive the first NBO already two-days post-delivery, no pre-test assessment can  
6 be obtained for the interaction and infant measures. Hence, analyses of intervention  
7 effects will be based on differences between groups at 4 and 6 months post-delivery  
8 controlling for relevant covariates. The data is collected using online questionnaires,  
9 computerized cognitive tests, video-filmed observations of mother-infant interactions,  
10 and a standardised test of the child's cognitive, communicative and motor  
11 development (Bayley Scales of Infant and Toddler Development; 81).  
12  
13  
14  
15  
16  
17  
18  
19  
20

21 **Table 1 Study protocol and data collection at different time points during the**  
22 **study**  
23

| Data collection                                 | T1 <sup>1</sup> | T2 <sup>2</sup> | T3 <sup>3</sup> | Birth | T4 <sup>4</sup> | T5 <sup>5</sup> | T6 <sup>6</sup> |
|-------------------------------------------------|-----------------|-----------------|-----------------|-------|-----------------|-----------------|-----------------|
| <b><u>Women/mothers and men/fathers</u></b>     |                 |                 |                 |       |                 |                 |                 |
| Demographic information                         | •               |                 |                 |       |                 |                 |                 |
| EPDS (Depressive symptoms)                      | •               | •               | •               |       | •               | •               | •               |
| BDI-II (Depressive symptoms)                    | •               |                 |                 |       |                 | •               |                 |
| PRAQ-R (Pregnancy related anxiety)              | •               | •               | •               |       |                 |                 |                 |
| ACE (Adverse childhood experiences)             | •               |                 |                 |       |                 |                 |                 |
| TWEAK (Risk drinking during pregnancy)          | •               |                 |                 |       |                 |                 |                 |
| PTQ (Repetitive negative thinking)              | •               |                 |                 |       | •               |                 |                 |
| LSS (Life stress)                               | •               |                 |                 |       |                 | •               |                 |
| IAT (Implicit associations)                     | •               |                 |                 |       |                 | •               |                 |
| EDP (Selective attention)                       | •               |                 |                 |       |                 | •               |                 |
| YSQ (Maladaptive core beliefs)                  |                 | •               |                 |       |                 |                 |                 |
| The face recognition task                       |                 | •               |                 |       | •               |                 |                 |
| RRS (Rumination)                                |                 |                 | •               |       |                 |                 |                 |
| MAAS / PAAS (Prenatal self reported attachment) |                 |                 | •               |       |                 |                 |                 |
| ECR-R (Adult attachment style)                  |                 |                 | •               |       |                 |                 |                 |
| SWLS (Quality of life)                          |                 |                 | •               |       | •               |                 |                 |
| MPAS / PPAS (Parent-infant self reported)       |                 |                 | •               |       | •               |                 |                 |

Routine care plus 3 NBO consultations vs. Routine care

|    |                                          |   |   |
|----|------------------------------------------|---|---|
| 1  |                                          |   |   |
| 2  |                                          |   |   |
| 3  | attachment)                              |   |   |
| 4  | PRFQ (Reflective functioning)            | • | • |
| 5  |                                          |   |   |
| 6  | PSI-PD (Parenting stress)                | • |   |
| 7  |                                          |   |   |
| 8  | PSI (Parenting stress)                   |   | • |
| 9  |                                          |   |   |
| 10 | <b><u>Mothers – infants</u></b>          |   |   |
| 11 | Obstetric information                    | • |   |
| 12 |                                          |   |   |
| 13 | The diurnal clock (Sleep wakefulness and | • |   |
| 14 | distress diary)                          |   |   |
| 15 | EAS (Parent-child interaction)           |   | • |
| 16 |                                          |   |   |
| 17 | CRTQ (Infant temperament)                |   | • |
| 18 |                                          |   |   |
| 19 | Heart rate variability                   |   | • |
| 20 |                                          |   |   |
| 21 | ADBB (Infant withdrawal behavior)        |   | • |
| 22 |                                          |   |   |
| 23 | BSITD – screening version (Infant        |   | • |
| 24 | development)                             |   |   |

---

25 *Note.* <sup>1</sup>T1: 16-22 weeks gestation.

26 <sup>2</sup>T2: 24-30 weeks gestation.

27 <sup>3</sup>T3 / pre-intervention measures: about 31 week gestation.

28 <sup>4</sup>T4 / post-intervention measures: 6 weeks postpartum.

29 <sup>5</sup>T5 / follow-up measures: 4 months postpartum.

30 <sup>6</sup>T6 / follow-up measures: 6 months postpartum.

### 31 **The intervention**

32  
33  
34  
35  
36  
37  
38  
39 The NBO is designed to strengthen the parent-infant relationship and foster a  
40 positive alliance between the family and the health-care provider. It takes 20 to 40  
41 minutes to administer and consists of 18 neurobehavioral observations which give a  
42 profile of the infant's behavioural repertoire along the dimensions: attentional-  
43 interactional, autonomic, motor and state organization (74). How many items that are  
44 used in each NBO session depends on the child's state (e.g., asleep, awake and calm,  
45 or crying). This is in line with the recommendations for use of NBO in Norway (82)  
46 The parents are invited to actively participate in the shared observation of the infant's  
47 unique behavioural expressions. Together with the clinician, they can identify  
48 techniques for meeting the infant's responses, as well as ventilate feelings and  
49 thoughts, and ask questions.  
50  
51  
52  
53  
54  
55  
56  
57  
58  
59  
60

1  
2  
3 The intervention group will receive three NBO consultations: 1) Routine care  
4 plus NBO at the maternity ward in hospital within two days post-delivery; 2) Routine  
5 home visit plus the NBO by a public health nurse when the infant is 7-10 days old;  
6 and 3) NBO at the well-baby clinic when the infant is 4 weeks old. The intervention  
7 will be conducted by midwives at the University Hospital of North Norway (UNN),  
8 and public health nurses in Tromsø municipality. Both the midwives and health  
9 nurses are certified in using the NBO. The control group will receive care as usual.  
10 Between 7 and 10 days after birth a public health nurse routinely visits the family at  
11 home to evaluate the baby's weight gain and provide guidance on topics such as  
12 feeding, crying, sleeping patterns and handling the baby. The parents can also ask  
13 questions and voice concerns. Six weeks after birth, the mother and the infant visit the  
14 well-baby clinic. Participants in both groups have equal possibilities to seek out other  
15 health care interventions for their own or their baby's health during the project period.  
16  
17  
18  
19  
20  
21  
22  
23  
24  
25  
26  
27

## 28 **Instruments**

### 29 **Predictor variables / independent variables.**

30  
31  
32 ***Socio-demographics.*** This includes questions about gender, age, education,  
33 marital status, work situation, income, ethnicity, social support, whether pregnancy is  
34 wanted, number of pregnancies and children, medication, smoking, and questions  
35 about current and previous mental and physical health, as well as help seeking for  
36 mental health issues.  
37  
38  
39

40  
41 ***Parental cognition and maladaptive schemas.*** *The Rumination Response*  
42 *Scale* (RRS; 83) is a 22-item self-report measure designed to assess responses to  
43 depressed mood that are focused on the self, the symptoms, and on possible causes  
44 and consequences. *The Perseverative Thinking Questionnaire* (PTQ; 84) is a 15-item  
45 self-report measure developed as a content independent measure of repetitive negative  
46 thinking. *The Young Schema Questionnaire* (YSQ; 85) consists of 90 items measuring  
47 maladaptive core beliefs about the self and others that are rooted in adverse relational  
48 experiences in childhood and adolescence.  
49  
50  
51  
52

53  
54 ***Parental relationship measures.*** *Adverse Childhood Experiences* (ACE; 86) is  
55 a 10-item measure of emotional, physical, and sexual maltreatment and abuse in  
56 childhood. *The Experiences in Close Relationships-Revised Questionnaire* (ECR-R;  
57  
58  
59  
60

1  
2  
3 87) is a 36-item measure of adult attachment style. The ECR-R includes two  
4 attachment subscales: avoidance and anxiety. *The Maternal Antenatal Attachment*  
5 *Scale* (MAAS; 88) is a 19-item self-report used to assess maternal antenatal bonding  
6 to the foetus. *The Paternal Antenatal Attachment Scale* (PAAS; 89) is a 16-item self-  
7 report measure used to assess paternal behaviours, attitudes and feelings towards the  
8 foetus.  
9

10  
11  
12  
13 ***Measures of parental stress and alcohol abuse.*** *The Life stress scale* (LSS) is  
14 a subscale of the Parenting Stress Index (PSI; 90) consisting of 19 items measuring  
15 stress factors over the last 12 months. *The Pregnancy-Related Anxiety Questionnaire*  
16 (PRAQ-R; 91) is a 10-item self-report inventory that assesses three subscales of  
17 anxiety that are specific to pregnancy: fear of giving birth, fear of bearing a  
18 handicapped child, and pregnancy-related concerns about one's appearance. *The*  
19 *Tolerance, Worried, Eye-opener, Amnesia, Kut down* (TWEAK; 92) is a 5-item self-  
20 report scale developed to screen for risk drinking during pregnancy.  
21  
22

23  
24  
25  
26  
27 ***Experimental tests.*** Parental cognition and a potential depression related  
28 negative bias to infant signals (93) will be measured with a) a face recognition task  
29 (94, 95) b) a single category Implicit Associations Test (IAT) (96) and c) a modified  
30 Emotional Dot-Probe (EDP) Task (20, 97). The tests will be administered pre- and  
31 postpartum. A) *The face recognition task* measures bias towards memory of facial  
32 expressions. Pilot data yielded that patients with major depression were better in  
33 recognizing faces of negative valence than a matched control group (95). B) *The IAT*  
34 is a well-established measure of implicit attitudes towards the tested categories, e.g.,  
35 objects or persons (including the self). By associating the category of interest with  
36 positive and negative words, the resulting difference in reaction times sheds light on a  
37 person's attitude. We will use a single-category IAT to investigate attitudes towards  
38 infants, using neutral infant images (98). C) *The EDP* is a test used to assess selective  
39 attention. The presentation of emotional stimuli interferes with a spatial task to  
40 respond as quickly as possible to the location of a seen target (e.g. a dot or cross). In  
41 this exogenous cueing task, emotional infant faces (98) are presented either on the left  
42 or right side of the screen. Immediately after a probe is shown. The task is to respond  
43 as quickly as possible to the location of the probe. The valence of the stimulus and the  
44 mood of the subject biases attention either towards or away from the probe location  
45 (99, 100).  
46  
47  
48  
49  
50  
51  
52  
53  
54  
55  
56  
57  
58  
59  
60



## Outcome measures.

**Parental measures of depression, stress and quality of life.** *The Edinburgh Postnatal Depression Scale* (EPDS; 101) is a 10-item self-report inventory designed to identify women at risk for postnatal depression. Scores on the EPDS range from 0 - 30, and we use a threshold of 10 or more to define at least probable minor depression (102, 103). The scale is also validated for use in men (104). Depression severity will be assessed with *the Beck Depression Inventory-II* (BDI-II) (105). BDI-II is a 21-item self-report inventory, and scores on the inventory range from 0-63. Total scores will be categorized as follows: 0-13 minimal, 14-19 mild, 20-28 moderate and 29-63 severe. Depressive symptoms during pregnancy assessed with these scales will also be used as predictor variables. *The Parenting Stress Index* (PSI-FF, third edition; 90) is a parent self-report measure consisting of 120 items. It is designed to identify potentially dysfunctional parent-child systems and parental stress. The PSI yields a total stress score, and scores for two general domains: Child Domain and Parent Domain and the LSS (previously described). Quality of life will be assessed with *the Satisfaction With Life Scale* (SWLS) which is a 5-item scale measuring global life satisfaction according to the individual's own criteria (106). In addition, one item asking participants to rate how happy they feel will be included (107).

**Parent-infant measures.** In order to assess parent-child interaction, we will employ *the Emotional Availability Scale* (Infancy to Early Childhood Version up to 4 years) (EAS; 108). The EAS is rated on the basis of 15-30 minutes videotaped episodes of mother-infant play interaction. *The Parental Reflective Functioning Questionnaire* (PRFQ; 109) is an 18-item self-report questionnaire. It consists of three subscales: pre-mentalizing, certainty in mental states and interest and curiosity in mental states. *The Maternal Postnatal Attachment Scale* (MPAS; 110) and *The Paternal Postnatal Attachment Scale* (PPAS; 111) are 19-item self-report questionnaires for measuring mother- / father-infant attachment.

**Infant measures.** *The Cameron-Rice Temperament Questionnaire* (CRTQ; 112) is a 45-item inventory in which parents are asked to rate their infant's sensitivity, general activity, general intensity, frustration tolerance, adaptability, regularity, and soothability. *The diurnal clock* (DC; 113) is a sleep diary with quantifiable information about sleep, wakefulness and distress over a 24-h period. Prior to the

1  
2  
3 meeting at 6-weeks post-delivery the parents are sent two copies of this registration  
4 chart and are instructed to complete them over a 48 h period. *The screening test*  
5 *version of Bayley Scales of Infant and Toddler Development* (BSITD - Screening  
6 version; 81) is a short version of the Bayley-III full-scale version. Bayley is a test of  
7 cognitive, communicative and motor development, widely used for research and  
8 clinical purposes. *The Alarm Distress Baby Scale* (ADBB; 114) is completed based on  
9 child behavior during administration of the Bayley at 6 months. This scale is designed  
10 to detect signs of sustained withdrawal behavior in infants 2–24 months of age.

11  
12  
13  
14  
15  
16  
17 **Biological measures.** Heart rate variability will be measured in mothers and  
18 infants during child cognitive testing using wireless unobtrusive electrocardiogram  
19 (ECG)-equipment (115).

20  
21  
22  
23 **Fidelity measure.** After each NBO consultation the interventionist fills out a  
24 fidelity form developed for the current study that indicates which NBO-items were  
25 performed, who participated (mother, father etc.), intervention duration and which  
26 themes were discussed. The health workers also rate how they performed the  
27 intervention, e.g., to which degree they interpreted the baby's signals together with  
28 the parents, validated the parents' observations and skills, summed up their  
29 observations of the baby's strengths and need for support, and how much they  
30 counselled the parents.  
31  
32  
33  
34  
35  
36  
37  
38

### 39 **Ethical considerations and dissemination**

40  
41 The project follows the standards of the WMA Declaration of Helsinki –  
42 Ethical Principles for Medical Research Involving Human Subjects, and the project  
43 has been approved by the Regional Committee for Medical and Health Research  
44 Ethics in Northern Norway (2015/614). All participants receive both oral and written  
45 information about the project. Parents give informed consent for themselves and their  
46 infant's participation. Participants receive unique IDs, which they use for  
47 questionnaires, cognitive tests and observations. The sheet connecting IDs with names  
48 will be securely stored separately from the data. Only authorized personnel from the  
49 project will have access to this sheet. We are using a university survey system to  
50 ensure secure data storage. All investigators will have access to a data set cleaned of  
51 all personal identifiable information. Data sets will be password protected.  
52  
53  
54  
55  
56  
57  
58  
59  
60

1  
2  
3 During the data collection, it will be emphasized that the participant is free to  
4 decline the researcher's involvement. None of the assessments or interventions  
5 involves any health risks. As we cooperate with both primary health care in Tromsø  
6 municipality and the specialist mental health care services and they are well informed  
7 about the study, participants who are in need of more extensive services will be  
8 helped to get in touch with the health services for further treatment.  
9  
10

11  
12  
13 Results from the project will be disseminated in international and national  
14 peer-reviewed journals. The results will also be communicated at courses and  
15 conferences. In addition, results will be disseminated to the public in various media  
16 outlets, and study participants will be informed of the results through the study  
17 website: <http://site.uit.no/SIN>  
18  
19  
20  
21  
22  
23

## 24 Discussion

25  
26  
27 PPD is common among mothers and fathers. There is accumulating evidence  
28 that PPD interferes with a healthy interaction between parents and infants, as well as  
29 negative developmental outcomes for the child up to several years later. This study  
30 aims to increase the knowledge of cognitive risk factors for postpartum depression,  
31 interaction difficulties with the child and child development. Such knowledge will be  
32 of help in identifying risk families as early as pregnancy. In addition, we aim to  
33 investigate if NBO can be effective in preventing PPD and parent-infant interaction  
34 problems.  
35  
36  
37  
38  
39

40  
41 The main focus of the observation part of the study is to investigate cognitive  
42 risk factors for PPD and parent-infant relationship difficulties. Cognition is a  
43 predictor that has received relatively little attention in this field of research. Several  
44 researchers have suggested that cognitive processing and interpretation of infant  
45 signals is central for the parents' attunement to their child. To explore this assumption  
46 we have set up three cognitive tests using pictures of emotional infant faces to  
47 measure parents' attention, memory and implicit associations towards infants.  
48  
49  
50  
51  
52

53 Furthermore, the study expands on the transgenerational perspective by  
54 looking at parent's own adverse childhood experiences as background and reflective  
55 functioning for their coping with the postpartum period and relating to their infant.  
56  
57  
58  
59  
60

1  
2  
3 Further, we will study how this influences infant stress-related physiology, as  
4 measured with heart rate variability, which is proposed as a marker for emotion  
5 regulation.  
6  
7

8  
9 There is a need for interventions with a potential for preventing PPD and  
10 improving the parent- infant relationship. This may further promote a healthy  
11 development of the child. The NBO is a brief intervention that aims to sensitize  
12 parents to their infant's competencies. In the present study, one group of parents will  
13 receive three NBO-sessions as a universal preventive intervention during the first four  
14 weeks after birth, while the control group will receive standard health care. We will  
15 examine the NBO's potential positive effects on the parent-infant relationship, as well  
16 as in reducing depressive symptoms in the parents.  
17  
18  
19  
20  
21

22  
23 Finally, although fathers have become more active caregivers for infants in  
24 many societies, they are to a lesser degree included in research in this field compared  
25 to women. Accordingly, we also include fathers to explore their experiences in this  
26 period of transition, and examine factors associated with their relationship with the  
27 infant.  
28  
29  
30  
31  
32

### 33 34 **Contributors**

35 Study concept and design: Høifødt, Nordahl, Pfuhl, Landsem, Thimm, Ilstad, and Wang have all  
36 contributed equally to study concept and design. Drafting the manuscript: Høifødt, Nordahl, Pfuhl and  
37 Wang. Critical revision of the manuscript for important intellectual content: Høifødt, Nordahl, Pfuhl,  
38 Landsem, Thimm, Ilstad, and Wang.  
39

40  
41 **Funding** This study is supported by 'The National Program for Integrated Clinical Specialist and PhD-  
42 training for Psychologists' in Norway. This program is a cooperation between the Universities of  
43 Bergen, Oslo, Tromsø, the Norwegian University of Science and Technology (Trondheim), the  
44 Regional Health Authorities and the Norwegian Psychological Association. The program is funded  
45 jointly by The Ministry of Education and Research and The Ministry of Health and Care Services.  
46 Also, UiT The Arctic University of Norway has funded the post doc and research assistants who help  
47 in the study. Role of the funder/sponsor: The study sponsor had no role in the study concept, design  
48 and implementation of the study; collection, management, preparation, review, or approval of the  
49 manuscript, or the decision to submit the manuscript for publication. Obtained funding: Høifødt,  
50 Nordahl, Pfuhl, Thimm, and Wang.  
51  
52

53 **Competing interests** None declared.

54  
55 **Ethics approval** The project has been approved by the Regional Committee for Medical and Health  
56 Research Ethics in Northern Norway (2015/614).

57  
58 **Data sharing statement** This article is a protocol for an ongoing study. The data from the completed  
59 study will contain sensitive health information about the participants. Data cannot be made publicly  
60

available without compromising participant confidentiality and privacy. Directives from the Research ethical committee and The Norwegian Data Protection Authority thus prohibits us from making the data set publicly available.

## References

1. Matthey S, Barnett B, Ungerer J, Waters B. Paternal and maternal depressed mood during the transition to parenthood. *Journal of Affective Disorders*. 2000;60(2):75-85.
2. O'Hara MW, Swain AM. Rates and risk of postpartum depression: A meta-analysis. *International Review of Psychiatry*. 1996;8(1):37-54.
3. Reck C, Struben K, Backenstrass M, Stefenelli U, Reinig K, Fuchs T, et al. Prevalence, onset and comorbidity of postpartum anxiety and depressive disorders. *Acta Psychiatrica Scandinavica*. 2008;118(6):459-68.
4. Ramchandani P, O'Connor TG, Evans J, Heron J, Murray L, Stein A. The effects of pre- and postnatal depression in fathers: A natural experiment comparing the effects of exposure to depression on offspring. *Journal of Child Psychology and Psychiatry*. 2008;49(10):1069-78.
5. Bergström M. Depressive symptoms in new first-time fathers: Associations with age, sociodemographic characteristics, and antenatal psychological well-being. *Birth*. 2013;40(1):32-8.
6. Demontigny F, Girard ME, Lacharité C, Dubeau D, Devault A. Psychosocial factors associated with paternal postnatal depression. *Journal of Affective Disorders*. 2013;150(1):44-9.
7. Serhan N, Ege E, Ayranci U, Kosgeroglu N. Prevalence of postpartum depression in mothers and fathers and its correlates. *Journal of Clinical Nursing*. 2013;22(1-2):279-84.
8. Ngai FW, Ngu SF. Predictors of maternal and paternal depressive symptoms at postpartum. *Journal of Psychosomatic Research*. 2015;78(2):156-61.
9. Paulson JF, Bazemore SD. Prenatal and postpartum depression in fathers and its association with maternal depression: A meta-analysis. *JAMA*. 2010;303(19):1961-9.
10. Norhayati MN, Nik Hazlina NH, Asrenee AR, Wan Emilin WM. Magnitude and risk factors for postpartum symptoms: A literature review. *Journal of Affective Disorders*. 2014;175C:34-52.
11. McEwen BS. The neurobiology of stress: From serendipity to clinical relevance. *Brain Research*. 2000;886(1):172-89.
12. Opacka-Juffry J, Mohiyeddini C. Experience of stress in childhood negatively correlates with plasma oxytocin concentration in adult men. *Stress*. 2012;15(1):1-10.
13. Ikeda M, Hayashi M, Kamibepu K. The relationship between attachment style and postpartum depression. *Attachment & Human Development*. 2014;16(6):557-72.
14. Wee KY, Skouteris H, Pier C, Richardson B, Milgrom J. Correlates of ante- and postnatal depression in fathers: A systematic review. *Journal of Affective Disorders*. 2011;130(3):358-77.
15. Evans J, Heron J, Lewis G, Araya R, Wolke D. Negative self-schemas and the onset of depression in women: Longitudinal study. *British Journal of Psychiatry*. 2005;186:302-7.
16. Hipwell AE, Reynolds S, Pitts Crick E. Cognitive vulnerability to postnatal depressive symptomatology. *Journal of Reproductive and Infant Psychology*. 2004;22(3):211-27.

17. Barnum SE, Woody ML, Gibb BE. Predicting Changes in Depressive Symptoms from Pregnancy to Postpartum: The Role of Brooding Rumination and Negative Inferential Styles. *Cognitive Therapy and Research*. 2013;37(1):71-7.
18. Gotlib IH, Joormann J. Cognition and depression: Current status and future directions. *Annual Review of Clinical Psychology*. 2010;6:285.
19. Clark DA, Beck AT, Alford BA. Scientific foundations of cognitive theory and therapy of depression. New York, NY: John Wiley & Sons, Inc.; 1999.
20. Joormann J, Gotlib IH. Selective attention to emotional faces following recovery from depression. *Journal of Abnormal Psychology*. 2007;116(1):80.
21. Leppänen JM, Milders M, Bell JS, Terriere E, Hietanen JK. Depression biases the recognition of emotionally neutral faces. *Psychiatry research*. 2004;128(2):123-33.
22. Leyman L, De Raedt R, Schacht R, Koster EH. Attentional biases for angry faces in unipolar depression. *Psychological medicine*. 2007;37(03):393-402.
23. Surguladze SA, Young AW, Senior C, Brébion G, Travis MJ, Phillips ML. Recognition accuracy and response bias to happy and sad facial expressions in patients with major depression. *Neuropsychology*. 2004;18(2):212.
24. Joormann J, Gotlib IH. Is this happiness I see? Biases in the identification of emotional facial expressions in depression and social phobia. *Journal of abnormal psychology*. 2006;115(4):705.
25. Stein A, Arteche A, Lehtonen A, Craske M, Harvey A, Counsell N, et al. Interpretation of infant facial expression in the context of maternal postnatal depression. *Infant Behavior and Development*. 2010;33(3):273-8.
26. Arteche A, Joormann J, Harvey A, Craske M, Gotlib IH, Lehtonen A, et al. The effects of postnatal maternal depression and anxiety on the processing of infant faces. *Journal of affective disorders*. 2011;133(1):197-203.
27. Broth MR, Goodman SH, Hall C, Raynor LC. Depressed and well mothers' emotion interpretation accuracy and the quality of mother—infant interaction. *Infancy*. 2004;6(1):37-55.
28. Gil S, Teissèdre F, Chambres P, Droit-Volet S. The evaluation of emotional facial expressions in early postpartum depression mood: A difference between adult and baby faces? *Psychiatry Research*. 2011;186(2–3):281-6.
29. Nolen-Hoeksema S, Wisco BE, Lyubomirsky S. Rethinking rumination. *Perspectives on Psychological Science*. 2008;3(5):400-24.
30. Müller D, Teismann T, Havemann B, Michalak J, Seehagen S. Ruminative thinking as a predictor of perceived postpartum mother–infant bonding. *Cognitive Therapy and Research*. 2012;37(1):89-96.
31. Bistricky SL, Ingram RE, Atchley RA. Facial affect processing and depression susceptibility: Cognitive biases and cognitive neuroscience. *Psychological Bulletin* 2011;137(6):998-1028.
32. Field T. Postpartum depression effects on early interactions, parenting, and safety practices: A review. *Infant Behavior and Development*. 2010;33(1):1-6.
33. Feldman R, Granat A, Pariente C, Kanety H, Kuint J, Gilboa-Schechtman E. Maternal depression and anxiety across the postpartum year and infant social engagement, fear regulation, and stress reactivity. *Journal of the American Academy of Child & Adolescent Psychiatry*. 2009;48(9):919-27.
34. Parfitt Y, Pike A, Ayers S. The impact of parents' mental health on parent-baby interaction: A prospective study. *Infant Behavior and Development*. 2013;36(4):599-608.
35. Cummings EM, Davies PT. Maternal depression and child development. *Journal of Child Psychology and Psychiatry*. 1994;35(1):73-122.
36. Field T. Maternal depression effects on infants and early interventions. *Preventive medicine*. 1998;27(2):200-3.

- 1
- 2
- 3 37. Goodman SH, Gotlib IH. Risk for psychopathology in the children of depressed
- 4 mothers: A developmental model for understanding mechanisms of transmission.
- 5 *Psychological Review*. 1999;106(3):458.
- 6 38. Murray L, Cooper PJ. Effects of postnatal depression on infant development.
- 7 *Archives of Disease in Childhood*. 1997;77(2):99-101.
- 8 39. Gelfand DM, Teti DM. The effects of maternal depression on children. *Clinical*
- 9 *Psychology Review*. 1990;10(3):329-53.
- 10 40. Tronick E, Reck C. Infants of depressed mothers. *Harvard review of psychiatry*.
- 11 2009;17(2):147-56.
- 12 41. Kim P, Strathearn L, Swain JE. The maternal brain and its plasticity in humans.
- 13 *Hormones and Behavior*. 2016;77:113-23.
- 14 42. Kingston D, Tough S, Whitfield H. Prenatal and postpartum maternal
- 15 psychological distress and infant development: A systematic review. *Child Psychiatry &*
- 16 *Human Development*. 2012;43(5):683-714.
- 17 43. Fonagy P, Steele M, Steele H, Moran GS, Higgitt AC. The capacity for
- 18 understanding mental states: The reflective self in parent and child and its significance
- 19 for security of attachment. *Infant Mental Health Journal*. 1991(12):201-18.
- 20 44. Slade A. Parental reflective functioning: An introduction. *Attachment & Human*
- 21 *development*. 2005;7(3):269-81.
- 22 45. Reck C, Hunt A, Fuchs T, Weiss R, Noon A, Moehler E, et al. Interactive regulation
- 23 of affect in postpartum depressed mothers and their infants: an overview.
- 24 *Psychopathology*. 2004;37(6):272-80.
- 25 46. Reck C, Noe D, Stefenelli U, Fuchs T, Cenciotti F, Stehle E, et al. Interactive
- 26 coordination of currently depressed inpatient mothers and their infants during the
- 27 postpartum period. *Infant Mental Health Journal*. 2011;32(5):542-62.
- 28 47. Fonagy P, Target M. Bridging the transmission gap: An end to an important
- 29 mystery of attachment research? *Attachment & Human Development*. 2005;7(3):333-
- 30 43.
- 31 48. Fonagy P, Gergely G, Jurist E, Target M. *Affect regulation, mentalization, and the*
- 32 *development of the self*. New York: Other Press; 2002.
- 33 49. Muzik M, Bocknek EL, Broderick A, Richardson P, Rosenblum KL, Thelen K, et al.
- 34 Mother-infant bonding impairment across the first 6 months postpartum: the primacy
- 35 of psychopathology in women with childhood abuse and neglect histories. *Archives of*
- 36 *Women's Mental Health*. 2013;16(1):29-38.
- 37 50. Fonagy P, Luyten P, Moulton-Perkins A, Lee Y-W, Warren F, Howard S, et al.
- 38 Development and validation of a self-report measure of mentalizing: the Reflective
- 39 Functioning Questionnaire. *PLoS One*. 2016;11(7):e0158678.
- 40 51. Verhage ML, Schuengel C, Madigan S, Fearon RMP, Oosterman M, Cassibba R, et
- 41 al. Narrowing the transmission gap: A synthesis of three decades of research on
- 42 intergenerational transmission of attachment. *Psychological Bulletin*. 2016;142(4):337-
- 43 66.
- 44 52. Shah PE, Fonagy P, Strathearn L. Is attachment transmitted across generations?
- 45 The plot thickens. *Clinical Child Psychology and Psychiatry* 2010;15(3):329-45.
- 46 53. Slade A, Grienenberger J, Bernbach E, Levy D, Locker A. Maternal reflective
- 47 functioning, attachment, and the transmission gap: A preliminary study. *Attachment &*
- 48 *Human Development*. 2005;7(3):283-98.
- 49 54. Beardslee W, Versage E, Gladstone T. Children of affectively ill parents: A review
- 50 of the past 10 years. *Journal of the American Academy of Child and Adolescent*
- 51 *Psychiatry*. 1998;37(11):1134-41.
- 52 55. Martins C, Gaffan EA. Effects of early maternal depression on patterns of infant-
- 53 mother attachment: A meta-analytic investigation. *Journal of Child Psychology and*
- 54 *Psychiatry*. 2000;41(06):737-46.
- 55 56. Murray L. The impact of postnatal depression on infant development. *Journal of*
- 56 *Child Psychology and Psychiatry*. 1992;33(3):543-61.
- 57
- 58
- 59
- 60

- 1  
2  
3 57. Kelly K, Slade A, Grienenberger JF. Maternal reflective functioning, mother-  
4 infant affective communication, and infant attachment: Exploring the link between  
5 mental states and observed caregiving behavior in the intergenerational transmission of  
6 attachment. *Attachment & Human Development*. 2005;7(3):299-311.
- 7 58. Groh AM, Roisman GI, van Ijzendoorn MH, Bakermans-Kranenburg MJ, Fearon  
8 RP. The significance of insecure and disorganized attachment for children's internalizing  
9 symptoms: A meta-analytic study. *Child Development*. 2012;83(2):591-610.
- 10 59. van Ijzendoorn MH, Schuengel C, Bakermans-Kranenburg MJ. Disorganized  
11 attachment in early childhood: Meta-analysis of precursors, concomitants, and sequelae.  
12 *Development and Psychopathology*. 1999;11(02):225-50.
- 13 60. Hay DF, Pawlby S, Angold A, Harold GT, Sharp D. Pathways to violence in the  
14 children of mothers who were depressed postpartum. *Developmental Psychology*.  
15 2003;39(6):1083-94.
- 16 61. Kersten-Alvarez L, Hosman CH, Riksen-Walraven JM, van Doesum KM, Smeekens  
17 S, Hoefnagels C. Early school outcomes for children of postpartum depressed mothers:  
18 Comparison with a community sample. *Child Psychiatry & Human Development*.  
19 2012;43(2):201-18.
- 20 62. Murray L, Arteche A, Fearon P, Halligan S, Goodyer I, Cooper P. Maternal  
21 postnatal depression and the development of depression in offspring up to 16 years of  
22 age. *Journal of the American Academy of Child & Adolescent Psychiatry*.  
23 2011;50(5):460-70.
- 24 63. Bosquet Enlow M, King L, Schreier HMC, Howard JM, Rosenfield D, Ritz T, et al.  
25 Maternal sensitivity and infant autonomic and endocrine stress responses. *Early Human*  
26 *Development*. 2014;90(7):377-85.
- 27 64. Kaplan LA, Evans L, Monk C. Effects of mothers' prenatal psychiatric status and  
28 postnatal caregiving on infant biobehavioral regulation: Can prenatal programming be  
29 modified? *Early Human Development*. 2008;84(4):249-56.
- 30 65. Thayer JF, Åhs F, Fredrikson M, Sollers Iii JJ, Wager TD. A meta-analysis of heart  
31 rate variability and neuroimaging studies: Implications for heart rate variability as a  
32 marker of stress and health. *Neuroscience & Biobehavioral Reviews*. 2012;36(2):747-56.
- 33 66. Appelhans BM, Luecken LJ. Heart rate variability as an index of regulated  
34 emotional responding. *Review of General Psychology*. 2006;10(3):229-40.
- 35 67. Ramchandani P, Stein A, Evans J, O'Connor TG. Paternal depression in the  
36 postnatal period and child development: A prospective population study. *The Lancet*.  
37 2005;365(9478):2201-5.
- 38 68. Hanington L, Heron J, Stein A, Ramchandani P. Parental depression and child  
39 outcomes: Is marital conflict the missing link? *Child: Care, Health and Development*.  
40 2012;38(4):520-9.
- 41 69. Fletcher RJ, Feeman E, Garfield C, Vimpani G. The effects of early paternal  
42 depression on children's development. *The Medical Journal of Australia*. 2011;195(11-  
43 12):685-9.
- 44 70. Cramer B. Are postpartum depressions a mother-infant relationship disorder?  
45 *Infant Mental Health Journal*. 1993;14(4):283-97.
- 46 71. Nylén KJ, Moran TE, Franklin CL, O'Hara MW. Maternal depression: A review of  
47 relevant treatment approaches for mothers and infants. *Infant Mental Health Journal*.  
48 2006;27(4):327-43.
- 49 72. Paris R, Bolton RE, Spielman E. Evaluating a home-based dyadic intervention:  
50 Changes in postpartum depression, maternal perceptions, and mother-infant  
51 interactions. *Infant Mental Health Journal*. 2011;32(3):319-38.
- 52 73. Bauer A, Parsonage M, Knapp M, Iemmi V, Adelaja B. Costs of perinatal mental  
53 health problems. London, UK: London School of Economics and Political Science, 2014.
- 54 74. Nugent JK, Keefer CH, Minear S, Johnson LC, Blanchard Y. Understanding  
55 newborn behavior & early relationships: The Newborn Behavioral Observations (NBO)  
56 system handbook: Brookes Pub; 2007.
- 57  
58  
59  
60



- 1  
2  
3 75. Sanders LW, Buckner EB. The Newborn Behavioral Observations System as a  
4 nursing intervention to enhance engagement in first-time mothers: Feasibility and  
5 desirability. *Pediatric nursing*. 2006;32(5):455.
- 6 76. McManus BM, Nugent JK. A neurobehavioral intervention incorporated into a  
7 state early intervention program is associated with higher perceived quality of care  
8 among parents of high-risk newborns. *The Journal of Behavioral Health Services &*  
9 *Research*. 2014;41(3):381-9.
- 10 77. Nugent JK, Bartlett JD, Valim C. Effects of an infant-focused relationship-based  
11 hospital and home visiting intervention on reducing symptoms of postpartum maternal  
12 depression: A pilot study. *Infants & Young Children*. 2014;27(4):292-304.
- 13 78. Nicolson S, Judd F, Thomson-Salo F, Mitchell S. Supporting the adolescent  
14 mother–infant relationship: Preliminary trial of a brief perinatal attachment  
15 intervention. *Archives of Women's Mental Health*. 2013;16(6):511-20.
- 16 79. Statistics Norway. Population and population changes, 1 January 2016:  
17 Estimated figures 2016 [Available from:  
18 <https://www.ssb.no/en/befolkning/statistikker/folkemengde/aar-berekna/2015-12-17>.  
19
- 20 80. The Little in Norway Study (LiN-study). A longitudinal population study of infant  
21 vulnerability and plasticity from pregnancy to age 18 months. The research Council of  
22 Norway. Project No.196156: 2010.
- 23 81. Bayley N. The screening test version of Bayley Scales of Infant and Toddler  
24 Development. 3rd ed. San Antonio: Harcourt Assessment; 2006.
- 25 82. Slinning K, Vannebo UT, Landsem I-P, Bøhle NC, Sandtrø H, Greve RA. Report by  
26 the Norway NBO trainer team Boston Children's Hospital; 2016 [Available from:  
27 <http://www.childrenshospital.org/research-and-innovation/research/centers/brazelton-institute/international/norway>.  
28
- 29 83. Nolen-Hoeksema S, Morrow J. A prospective study of depression and  
30 posttraumatic stress symptoms after a natural disaster: The 1989 Ioma prieta  
31 earthquake. *Journal of Personality and Social psychology*. 1991;61:115-21.
- 32 84. Ehring T, Zetsche U, Weidacker K, Wahl K, Schönfeld S, Ehlers A. The  
33 Perseverative Thinking Questionnaire (PTQ): Validation of a content-independent  
34 measure of repetitive negative thinking. *Journal of Behavior Therapy and Experimental*  
35 *Psychiatry*. 2011;42(2):225-32.
- 36 85. Young J. Young Schema Questionnaire-S3. Cognitive Therapy Center of New  
37 York. 2005.
- 38 86. Felitti VJ, Anda RF, Nordenberg D, Williamson DF, Spitz AM, Edwards V, et al.  
39 Relationship of childhood abuse and household dysfunction to many of the leading  
40 causes of death in adults: The Adverse Childhood Experiences (ACE) Study. *American*  
41 *Journal of Preventive Medicine*. 1998;14(4):245-58.
- 42 87. Fraley RC, Waller NG, Brennan KA. An item response theory analysis of self-  
43 report measures of adult attachment. *Journal of Personality and Social Psychology*.  
44 2000;78(2):350.
- 45 88. Condon JT. The assessment of antenatal emotional attachment: Development of  
46 a questionnaire instrument. *British Journal of Medical Psychology*. 1993;66(2):167-83.
- 47 89. Condon JT. The parental-foetal relationship: A comparison of male and female  
48 expectant parents. *Journal of Psychosomatic Obstetrics & Gynecology*. 1985;4(4):271-  
49 84.
- 50 90. Abidin RR. Parenting Stress Index (PSI): Pediatric Psychology Press; 1990.
- 51 91. Huizink AC, Mulder EJ, de Medina PGR, Visser GH, Buitelaar JK. Is pregnancy  
52 anxiety a distinctive syndrome? *Early human development*. 2004;79(2):81-91.
- 53 92. Russel M. New assessment tools for drinking in pregnancy: T-ACE, TWEAK, and  
54 others. *Alcohol Health and Research World*. 1994;18(1):55-61.
- 55  
56  
57  
58  
59  
60

- 1  
2  
3 93. Webb R, Ayers S. Cognitive biases in processing infant emotion by women with  
4 depression, anxiety and post-traumatic stress disorder in pregnancy or after birth: A  
5 systematic review. *Cognition and Emotion*. 2014(ahead-of-print):1-17.
- 6 94. Rhodes MG, Anastasi JS. The own-age bias in face recognition: A meta-analytic  
7 and theoretical review. *Psychological Bulletin*. 2012;138(1):146-74.
- 8 95. Bohne A, Nordahl D, Lindahl ÅAW, Ulvenes P, Wang CEA, Pfuhl G. Is attention  
9 and memory towards infants preserved in patients with major depression? In prep.
- 10 96. Greenwald AG, McGhee DE, Schwartz JL. Measuring individual differences in  
11 implicit cognition: The implicit association test. *Journal of Personality and Social  
12 Psychology*. 1998;74(6):1464.
- 13 97. Gotlib IH, Kasch KL, Traill S, Joormann J, Arnow BA, Johnson SL. Coherence and  
14 specificity of information-processing biases in depression and social phobia. *Journal of  
15 Abnormal Psychology*. 2004;113(3):386.
- 16 98. Maack JK, Bohne A, Nordahl D, Livsdatter L, Lindahl Å, Øvervoll M, et al. The  
17 Tromsø Infant Faces Database (TIF): Development, validation and application to assess  
18 parenting experience on clarity and intensity ratings. *Frontiers in Psychology* 2017;8:1-  
19 13.
- 20 99. Clasen PC, Wells TT, Ellis AJ, Beevers CG. Attentional biases and the persistence  
21 of sad mood in major depressive disorder. *Journal of Abnormal Psychology*.  
22 2013;122(1):74-85.
- 23 100. Koster EHW, De Raedt R, Goeleven E, Franck E, Crombez G. Mood-congruent  
24 attentional bias in dysphoria: Maintained attention to and impaired disengagement from  
25 negative information. *Emotion*. 2005;5(4):446-55.
- 26 101. Cox JL, Holden JM, Sagovsky R. Detection of postnatal depression: Development  
27 of the 10-item Edinburgh Postnatal Depression Scale. *The British Journal of Psychiatry*.  
28 1987;150(6):782-6.
- 29 102. Eberhard-Gran A, Eskild K, Tambs B, Schei S, Opjordsmoen M. The Edinburgh  
30 Postnatal Depression Scale: Validation in a Norwegian community sample. *Nordic  
31 Journal of Psychiatry*. 2001;55(2):113-7.
- 32 103. Matthey S, Henshaw C, Elliott S, Barnett B. Variability in use of cut-off scores and  
33 formats on the Edinburgh Postnatal Depression Scale: Implications for clinical and  
34 research practice. *Archives of Women's Mental Health*. 2006;9(6):309-15.
- 35 104. Matthey S, Barnett B, Kavanagh DJ, Howie P. Validation of the Edinburgh  
36 Postnatal Depression Scale for men, and comparison of item endorsement with their  
37 partners. *Journal of Affective Disorders*. 2001;64(2-3):175-84.
- 38 105. Beck AT, Steer RA, Brown GK. BDI-II, Beck Depression Inventory: Manual. San  
39 Antonio, TX: The Psychological Corporation; 1996.
- 40 106. Diener E, Emmons RA, Larsen RJ, Griffin S. The Satisfaction With Life Scale.  
41 *Journal of Personality Assessment*. 1985;49:71-5.
- 42 107. European Social Survey. European Social Survey: Source questionnaire  
43 amendment 03 2008 [Available from:  
44 [http://survey.net.ac.uk/index/ search1099/Ess/4732\\_2008-  
45 2009\\_quest\\_capi\\_papi\\_face\\_main.pdf#search=%22%22taking%20all%20t](http://survey.net.ac.uk/index/search1099/Ess/4732_2008-2009_quest_capi_papi_face_main.pdf#search=%22%22taking%20all%20t).  
46
- 47 108. Biringen Z, Derscheid D, Vliegen N, Closson L, Easterbrooks MA. Emotional  
48 availability (EA): Theoretical background, empirical research using the EA Scales, and  
49 clinical applications. *Developmental Review*. 2014;34(2):114-67.
- 50 109. Luyten P, Mayes L, Nijssens L. The Parental Reflective Functioning  
51 Questionnaire: Development, validation, and clinical application. *Infant Mental Health  
52 Journal*. 2011;31(3):109-  
53
- 54 110. Condon JT, Corkindale CJ. The assessment of parent-to-infant attachment:  
55 Development of a self-report questionnaire instrument. *Journal of Reproductive and  
56 Infant Psychology*. 1998;16(1):57-76.  
57  
58  
59  
60

- 1  
2  
3 111. Condon JT, Corkindale CJ, Boyce P. Assessment of postnatal paternal–infant  
4 attachment: Development of a questionnaire instrument. *Journal of Reproductive and*  
5 *Infant Psychology*. 2008;26(3):195-210.  
6 112. Cameron JR, Rice DC. Developing anticipatory guidance programs based on early  
7 assessment of infant temperament: 2 tests of a prevention model. *Journal of Pediatric*  
8 *Psychology*. 1986;11:221-34.  
9 113. Sarfi M, Martinsen H, Bakstad B, Røislien J, Waal H. Patterns in sleep–  
10 wakefulness in three-month old infants exposed to methadone or buprenorphine. *Early*  
11 *Human Development*. 2009;85(12):773-8.  
12 114. Guedeney A, Fermanian J. A validity and reliability study of assessment and  
13 screening for sustained withdrawal reaction in infancy: The Alarm Distress Baby scale.  
14 *Infant Mental Health Journal*. 2001;22(5):559-75.  
15 115. Biopac Systems Inc. CA, USA 2015.  
16  
17  
18  
19  
20  
21  
22  
23  
24  
25  
26  
27  
28  
29  
30  
31  
32  
33  
34  
35  
36  
37  
38  
39  
40  
41  
42  
43  
44  
45  
46  
47  
48  
49  
50  
51  
52  
53  
54  
55  
56  
57  
58  
59  
60

1  
2  
3  
4  
5  
6  
7  
8  
9  
10  
11  
12  
13  
14  
15  
16  
17  
18  
19  
20  
21  
22  
23  
24  
25  
26  
27  
28  
29  
30  
31  
32  
33  
34  
35  
36  
37  
38  
39  
40  
41  
42  
43  
44  
45  
46  
47  
48  
49  
50  
51  
52  
53  
54  
55  
56  
57  
58  
59  
60

Reporting guidelines

Dear editor,

since our manuscript presents both an observation study and an intervention study we found no reporting guidelines that satisfy both studies. Therefore we have tried to use both the SPIRIT guideline and the STROBE guideline.

For peer review only



SPIRIT 2013 Checklist: Recommended items to address in a clinical trial protocol and related documents\*

| Section/item                      | Item No | Description                                                                                                  |
|-----------------------------------|---------|--------------------------------------------------------------------------------------------------------------|
| <b>Administrative information</b> |         |                                                                                                              |
| Title                             | 1       | Descriptive title identifying the study design, population, interventions, and, if applicable, trial acronym |
|                                   |         | - Information about study population is missing from the title                                               |
| Trial registration                | 2a      | Trial identifier and registry name. If not yet registered, name of intended registry.                        |
|                                   |         | - Page 2 in the manuscript                                                                                   |
|                                   | 2b      | All items from the World Health Organization Trial Registration Data Set                                     |
| Protocol version                  | 3       | Date and version identifier                                                                                  |
|                                   |         | - date found in header, version identifier is missing.                                                       |
| Funding                           | 4       | Sources and types of financial, material, and other support                                                  |
|                                   |         | - Page 15 in the manuscript                                                                                  |
| Roles and responsibilities        | 5a      | Names, affiliations, and roles of protocol contributors                                                      |
|                                   |         | - Page 15 in the manuscript                                                                                  |
|                                   | 5b      | Name and contact information for the trial sponsor                                                           |
|                                   |         | - Page 15 in the manuscript.                                                                                 |

1  
2  
3  
4  
5  
6  
7  
8  
9  
10  
11  
12  
13  
14  
15  
16  
17  
18  
19  
20  
21  
22  
23

5c Role of study sponsor and funders, if any, in study design; collection, management, analysis, and interpretation of data; writing of the report; and the decision to submit the report for publication, including whether they will have ultimate authority over any of these activities

- The study sponsor had no role in the study concept, design and implementation of the study; collection, management, preparation, review, or approval of the manuscript, or the decision to submit the manuscript for publication.

5d Composition, roles, and responsibilities of the coordinating centre, steering committee, endpoint adjudication committee, data management team, and other individuals or groups overseeing the trial, if applicable (see Item 21a for data monitoring committee)

- not relevant

## Introduction

24  
25  
26  
27  
28  
29  
30  
31  
32  
33  
34  
35  
36  
37  
38  
39  
40  
41  
42  
43  
44

Background and rationale 6a Description of research question and justification for undertaking the trial, including summary of relevant studies (published and unpublished) examining benefits and harms for each intervention

- Page 3 to 7 in the manuscript

6b Explanation for choice of comparators

- Missing in the manuscript

Objectives 7 Specific objectives or hypotheses

- Page 6 and 7 in the manuscript

45  
46  
47  
48  
49  
50  
51  
52

Trial design 8 Description of trial design including type of trial (eg, parallel group, crossover, factorial, single group), allocation ratio, and framework (eg, superiority, equivalence, noninferiority, exploratory)

- Page 7 in the manuscript

## Methods: Participants, interventions, and outcomes

|    |               |   |                                                                                                                                                                                    |
|----|---------------|---|------------------------------------------------------------------------------------------------------------------------------------------------------------------------------------|
| 1  |               |   |                                                                                                                                                                                    |
| 2  |               |   |                                                                                                                                                                                    |
| 3  |               |   |                                                                                                                                                                                    |
| 4  |               |   |                                                                                                                                                                                    |
| 5  |               |   |                                                                                                                                                                                    |
| 6  |               |   |                                                                                                                                                                                    |
| 7  |               |   |                                                                                                                                                                                    |
| 8  |               |   |                                                                                                                                                                                    |
| 9  |               |   |                                                                                                                                                                                    |
| 10 |               |   |                                                                                                                                                                                    |
| 11 | Study setting | 9 | Description of study settings (eg, community clinic, academic hospital) and list of countries where data will be collected. Reference to where list of study sites can be obtained |
| 12 |               |   |                                                                                                                                                                                    |
| 13 |               |   |                                                                                                                                                                                    |
| 14 |               |   |                                                                                                                                                                                    |
| 15 |               |   |                                                                                                                                                                                    |
| 16 |               |   |                                                                                                                                                                                    |
| 17 |               |   |                                                                                                                                                                                    |
| 18 |               |   |                                                                                                                                                                                    |
| 19 |               |   |                                                                                                                                                                                    |
| 20 |               |   |                                                                                                                                                                                    |
| 21 |               |   |                                                                                                                                                                                    |
| 22 |               |   |                                                                                                                                                                                    |
| 23 |               |   |                                                                                                                                                                                    |
| 24 |               |   |                                                                                                                                                                                    |
| 25 |               |   |                                                                                                                                                                                    |
| 26 |               |   |                                                                                                                                                                                    |
| 27 |               |   |                                                                                                                                                                                    |
| 28 |               |   |                                                                                                                                                                                    |
| 29 |               |   |                                                                                                                                                                                    |
| 30 |               |   |                                                                                                                                                                                    |
| 31 |               |   |                                                                                                                                                                                    |
| 32 |               |   |                                                                                                                                                                                    |
| 33 |               |   |                                                                                                                                                                                    |
| 34 |               |   |                                                                                                                                                                                    |
| 35 |               |   |                                                                                                                                                                                    |
| 36 |               |   |                                                                                                                                                                                    |
| 37 |               |   |                                                                                                                                                                                    |
| 38 |               |   |                                                                                                                                                                                    |
| 39 |               |   |                                                                                                                                                                                    |
| 40 |               |   |                                                                                                                                                                                    |
| 41 |               |   |                                                                                                                                                                                    |
| 42 |               |   |                                                                                                                                                                                    |
| 43 |               |   |                                                                                                                                                                                    |
| 44 |               |   |                                                                                                                                                                                    |
| 45 |               |   |                                                                                                                                                                                    |
| 46 |               |   |                                                                                                                                                                                    |
| 47 |               |   |                                                                                                                                                                                    |
| 48 |               |   |                                                                                                                                                                                    |
| 49 |               |   |                                                                                                                                                                                    |
| 50 |               |   |                                                                                                                                                                                    |
| 51 |               |   |                                                                                                                                                                                    |
| 52 |               |   |                                                                                                                                                                                    |
| 53 |               |   |                                                                                                                                                                                    |
| 54 |               |   |                                                                                                                                                                                    |
| 55 |               |   |                                                                                                                                                                                    |
| 56 |               |   |                                                                                                                                                                                    |
| 57 |               |   |                                                                                                                                                                                    |
| 58 |               |   |                                                                                                                                                                                    |
| 59 |               |   |                                                                                                                                                                                    |
| 60 |               |   |                                                                                                                                                                                    |

|    |             |    |                                                                      |
|----|-------------|----|----------------------------------------------------------------------|
| 1  |             |    |                                                                      |
| 2  | Participant | 13 | Time schedule of enrolment, interventions (including any run-ins and |
| 3  | timeline    |    | washouts), assessments, and visits for participants. A schematic     |
| 4  |             |    | diagram is highly recommended (see Figure)                           |
| 5  |             |    |                                                                      |
| 6  |             |    | - time schedule of enrolment presented on page 7. A figure for       |
| 7  |             |    | assessments at different time points is found on page 9.             |
| 8  |             |    |                                                                      |
| 9  | Sample size | 14 | Estimated number of participants needed to achieve study objectives  |
| 10 |             |    | and how it was determined, including clinical and statistical        |
| 11 |             |    | assumptions supporting any sample size calculations                  |
| 12 |             |    |                                                                      |
| 13 |             |    | - see page 8 for power calculations.                                 |
| 14 |             |    |                                                                      |
| 15 | Recruitment | 15 | Strategies for achieving adequate participant enrolment to reach     |
| 16 |             |    | target sample size                                                   |
| 17 |             |    |                                                                      |
| 18 |             |    | - Yes, see page 7 in the manuscript.                                 |
| 19 |             |    |                                                                      |
| 20 |             |    |                                                                      |
| 21 |             |    |                                                                      |

### Methods: Assignment of interventions (for controlled trials)

#### Allocation:

|    |                |     |                                                                         |
|----|----------------|-----|-------------------------------------------------------------------------|
| 25 |                |     |                                                                         |
| 26 | Sequence       | 16a | Method of generating the allocation sequence (eg, computer-             |
| 27 | generation     |     | generated random numbers), and list of any factors for stratification.  |
| 28 |                |     | To reduce predictability of a random sequence, details of any planned   |
| 29 |                |     | restriction (eg, blocking) should be provided in a separate document    |
| 30 |                |     | that is unavailable to those who enrol participants or assign           |
| 31 |                |     | interventions                                                           |
| 32 |                |     |                                                                         |
| 33 |                |     | - not relevant                                                          |
| 34 |                |     |                                                                         |
| 35 |                |     |                                                                         |
| 36 | Allocation     | 16b | Mechanism of implementing the allocation sequence (eg, central          |
| 37 | concealment    |     | telephone; sequentially numbered, opaque, sealed envelopes),            |
| 38 | mechanism      |     | describing any steps to conceal the sequence until interventions are    |
| 39 |                |     | assigned                                                                |
| 40 |                |     |                                                                         |
| 41 |                |     | - not relevant                                                          |
| 42 |                |     |                                                                         |
| 43 |                |     |                                                                         |
| 44 | Implementation | 16c | Who will generate the allocation sequence, who will enrol participants, |
| 45 |                |     | and who will assign participants to interventions                       |
| 46 |                |     |                                                                         |
| 47 |                |     | - not relevant                                                          |
| 48 |                |     |                                                                         |
| 49 | Blinding       | 17a | Who will be blinded after assignment to interventions (eg, trial        |
| 50 | (masking)      |     | participants, care providers, outcome assessors, data analysts), and    |
| 51 |                |     | how                                                                     |
| 52 |                |     |                                                                         |
| 53 |                |     | - not relevant                                                          |
| 54 |                |     |                                                                         |
| 55 |                |     |                                                                         |
| 56 |                |     |                                                                         |
| 57 |                |     |                                                                         |
| 58 |                |     |                                                                         |
| 59 |                |     |                                                                         |
| 60 |                |     |                                                                         |



1  
2  
3  
4  
5  
6  
7  
8  
9  
10  
11  
12  
13  
14  
15  
16  
17  
18  
19  
20  
21  
22  
23  
24  
25  
26  
27  
28  
29  
30  
31  
32  
33  
34  
35  
36  
37  
38  
39  
40  
41  
42  
43  
44  
45  
46  
47  
48  
49  
50  
51  
52  
53  
54  
55  
56  
57  
58  
59  
60

17b If blinded, circumstances under which unblinding is permissible, and procedure for revealing a participant's allocated intervention during the trial

- not relevant

### Methods: Data collection, management, and analysis

Data collection methods 18a Plans for assessment and collection of outcome, baseline, and other trial data, including any related processes to promote data quality (eg, duplicate measurements, training of assessors) and a description of study instruments (eg, questionnaires, laboratory tests) along with their reliability and validity, if known. Reference to where data collection forms can be found, if not in the protocol

- See figure page 9 for plans for assessment and collection of data. For further informasjon about study instruments see page 10 to 13. Information about reliability and validity of study instruments is missing, as are reference to where data collection forms can be found.

18b Plans to promote participant retention and complete follow-up, including list of any outcome data to be collected for participants who discontinue or deviate from intervention protocols

- missing from the protocol

Data management 19 Plans for data entry, coding, security, and storage, including any related processes to promote data quality (eg, double data entry; range checks for data values). Reference to where details of data management procedures can be found, if not in the protocol

- se page 13

Statistical methods 20a Statistical methods for analysing primary and secondary outcomes. Reference to where other details of the statistical analysis plan can be found, if not in the protocol

- missing

20b Methods for any additional analyses (eg, subgroup and adjusted analyses)

- missing

20c Definition of analysis population relating to protocol non-adherence (eg, as randomised analysis), and any statistical methods to handle missing data (eg, multiple imputation)

- missing

**Methods: Monitoring**

- 1  
2  
3  
4  
5  
6  
7  
8  
9  
10  
11  
12  
13  
14  
15  
16  
17  
18  
19  
20  
21  
22  
23  
24  
25  
26  
27  
28  
29  
30  
31  
32  
33
- Data monitoring 21a Composition of data monitoring committee (DMC); summary of its role and reporting structure; statement of whether it is independent from the sponsor and competing interests; and reference to where further details about its charter can be found, if not in the protocol. Alternatively, an explanation of why a DMC is not needed
- not relevant
- 21b Description of any interim analyses and stopping guidelines, including who will have access to these interim results and make the final decision to terminate the trial
- missing from the protocol
- Harms 22 Plans for collecting, assessing, reporting, and managing solicited and spontaneously reported adverse events and other unintended effects of trial interventions or trial conduct
- see page 13 and 14 for information about plan for managing participants who are in need of more extensive services.
- Auditing 23 Frequency and procedures for auditing trial conduct, if any, and whether the process will be independent from investigators and the sponsor
- not relevant

**Ethics and dissemination**

- 34  
35  
36  
37  
38  
39  
40  
41  
42  
43  
44  
45  
46  
47  
48  
49  
50  
51  
52  
53  
54  
55  
56  
57  
58  
59  
60
- Research ethics approval 24 Plans for seeking research ethics committee/institutional review board (REC/IRB) approval
- The Regional Committee for Medical Research Ethics in Northern Norway have approved the project, see page 13.
- Protocol amendments 25 Plans for communicating important protocol modifications (eg, changes to eligibility criteria, outcomes, analyses) to relevant parties (eg, investigators, REC/IRBs, trial participants, trial registries, journals, regulators)
- missing from the manuscript
- Consent or assent 26a Who will obtain informed consent or assent from potential trial participants or authorised surrogates, and how (see Item 32)
- see page 7 and 8

|    |                               |     |                                                                                                                                                                                                                                                                                     |
|----|-------------------------------|-----|-------------------------------------------------------------------------------------------------------------------------------------------------------------------------------------------------------------------------------------------------------------------------------------|
| 1  |                               | 26b | Additional consent provisions for collection and use of participant data and biological specimens in ancillary studies, if applicable                                                                                                                                               |
| 2  |                               |     |                                                                                                                                                                                                                                                                                     |
| 3  |                               |     |                                                                                                                                                                                                                                                                                     |
| 4  |                               |     |                                                                                                                                                                                                                                                                                     |
| 5  |                               |     | - not relevant                                                                                                                                                                                                                                                                      |
| 6  |                               |     |                                                                                                                                                                                                                                                                                     |
| 7  | Confidentiality               | 27  | How personal information about potential and enrolled participants will be collected, shared, and maintained in order to protect confidentiality before, during, and after the trial                                                                                                |
| 8  |                               |     |                                                                                                                                                                                                                                                                                     |
| 9  |                               |     |                                                                                                                                                                                                                                                                                     |
| 10 |                               |     |                                                                                                                                                                                                                                                                                     |
| 11 |                               |     | - Yes, see page 13                                                                                                                                                                                                                                                                  |
| 12 |                               |     |                                                                                                                                                                                                                                                                                     |
| 13 |                               |     |                                                                                                                                                                                                                                                                                     |
| 14 | Declaration of interests      | 28  | Financial and other competing interests for principal investigators for the overall trial and each study site                                                                                                                                                                       |
| 15 |                               |     |                                                                                                                                                                                                                                                                                     |
| 16 |                               |     |                                                                                                                                                                                                                                                                                     |
| 17 |                               |     | - yes, see page 15                                                                                                                                                                                                                                                                  |
| 18 |                               |     |                                                                                                                                                                                                                                                                                     |
| 19 | Access to data                | 29  | Statement of who will have access to the final trial dataset, and disclosure of contractual agreements that limit such access for investigators                                                                                                                                     |
| 20 |                               |     |                                                                                                                                                                                                                                                                                     |
| 21 |                               |     |                                                                                                                                                                                                                                                                                     |
| 22 |                               |     |                                                                                                                                                                                                                                                                                     |
| 23 |                               |     |                                                                                                                                                                                                                                                                                     |
| 24 |                               |     | - see page 15                                                                                                                                                                                                                                                                       |
| 25 |                               |     |                                                                                                                                                                                                                                                                                     |
| 26 | Ancillary and post-trial care | 30  | Provisions, if any, for ancillary and post-trial care, and for compensation to those who suffer harm from trial participation                                                                                                                                                       |
| 27 |                               |     |                                                                                                                                                                                                                                                                                     |
| 28 |                               |     |                                                                                                                                                                                                                                                                                     |
| 29 |                               |     |                                                                                                                                                                                                                                                                                     |
| 30 |                               |     | - not relevant                                                                                                                                                                                                                                                                      |
| 31 |                               |     |                                                                                                                                                                                                                                                                                     |
| 32 | Dissemination policy          | 31a | Plans for investigators and sponsor to communicate trial results to participants, healthcare professionals, the public, and other relevant groups (eg, via publication, reporting in results databases, or other data sharing arrangements), including any publication restrictions |
| 33 |                               |     |                                                                                                                                                                                                                                                                                     |
| 34 |                               |     |                                                                                                                                                                                                                                                                                     |
| 35 |                               |     |                                                                                                                                                                                                                                                                                     |
| 36 |                               |     |                                                                                                                                                                                                                                                                                     |
| 37 |                               |     |                                                                                                                                                                                                                                                                                     |
| 38 |                               |     | - yes, see page 14                                                                                                                                                                                                                                                                  |
| 39 |                               |     |                                                                                                                                                                                                                                                                                     |
| 40 |                               | 31b | Authorship eligibility guidelines and any intended use of professional writers                                                                                                                                                                                                      |
| 41 |                               |     |                                                                                                                                                                                                                                                                                     |
| 42 |                               |     |                                                                                                                                                                                                                                                                                     |
| 43 |                               |     | - missing                                                                                                                                                                                                                                                                           |
| 44 |                               |     |                                                                                                                                                                                                                                                                                     |
| 45 |                               | 31c | Plans, if any, for granting public access to the full protocol, participant-level dataset, and statistical code                                                                                                                                                                     |
| 46 |                               |     |                                                                                                                                                                                                                                                                                     |
| 47 |                               |     |                                                                                                                                                                                                                                                                                     |
| 48 |                               |     |                                                                                                                                                                                                                                                                                     |
| 49 |                               |     | - missing                                                                                                                                                                                                                                                                           |
| 50 |                               |     |                                                                                                                                                                                                                                                                                     |
| 51 | <b>Appendices</b>             |     |                                                                                                                                                                                                                                                                                     |
| 52 |                               |     |                                                                                                                                                                                                                                                                                     |
| 53 | Informed consent materials    | 32  | Model consent form and other related documentation given to participants and authorised surrogates                                                                                                                                                                                  |
| 54 |                               |     |                                                                                                                                                                                                                                                                                     |
| 55 |                               |     |                                                                                                                                                                                                                                                                                     |
| 56 |                               |     |                                                                                                                                                                                                                                                                                     |
| 57 |                               |     | - missing                                                                                                                                                                                                                                                                           |
| 58 |                               |     |                                                                                                                                                                                                                                                                                     |
| 59 |                               |     |                                                                                                                                                                                                                                                                                     |
| 60 |                               |     |                                                                                                                                                                                                                                                                                     |

1  
2  
3  
4  
5  
6  
7  
8  
9  
10  
11  
12  
13  
14  
15  
16  
17  
18  
19  
20  
21  
22  
23  
24  
25  
26  
27  
28  
29  
30  
31  
32  
33  
34  
35  
36  
37  
38  
39  
40  
41  
42  
43  
44  
45  
46  
47  
48  
49  
50  
51  
52  
53  
54  
55  
56  
57  
58  
59  
60

Biological 33 Plans for collection, laboratory evaluation, and storage of biological specimens for genetic or molecular analysis in the current trial and for future use in ancillary studies, if applicable

- not relevant

---

\*It is strongly recommended that this checklist be read in conjunction with the SPIRIT 2013 Explanation & Elaboration for important clarification on the items. Amendments to the protocol should be tracked and dated. The SPIRIT checklist is copyrighted by the SPIRIT Group under the Creative Commons "[Attribution-NonCommercial-NoDerivs 3.0 Unported](https://creativecommons.org/licenses/by-nc-nd/3.0/)" license.

For peer review only

## STROBE Statement—checklist of items that should be included in reports of observational studies

|                              | Item No | Recommendation                                                                                                                                                                                                                                                                                                                                                                                                                                                                                                                                  |
|------------------------------|---------|-------------------------------------------------------------------------------------------------------------------------------------------------------------------------------------------------------------------------------------------------------------------------------------------------------------------------------------------------------------------------------------------------------------------------------------------------------------------------------------------------------------------------------------------------|
| <b>Title and abstract</b>    | 1       | (a) Indicate the study's design with a commonly used term in the title or the abstract<br>- Yes, page 1 in the manuscript<br><hr/> (b) Provide in the abstract an informative and balanced summary of what was done and what was found<br>- The abstract provides an informative summary of what we plan to do. The abstract is found in page 2 of the manuscript.                                                                                                                                                                              |
| <b>Introduction</b>          |         |                                                                                                                                                                                                                                                                                                                                                                                                                                                                                                                                                 |
| Background/rationale         | 2       | Explain the scientific background and rationale for the investigation being reported<br>- Page 3 to 6 in the manuscript                                                                                                                                                                                                                                                                                                                                                                                                                         |
| Objectives                   | 3       | State specific objectives, including any prespecified hypotheses<br>- Page 6 and 7 in the manuscript                                                                                                                                                                                                                                                                                                                                                                                                                                            |
| <b>Methods</b>               |         |                                                                                                                                                                                                                                                                                                                                                                                                                                                                                                                                                 |
| Study design                 | 4       | Present key elements of study design early in the paper<br>- Yes, key elements of study design are presented early in the method section. Page 7.                                                                                                                                                                                                                                                                                                                                                                                               |
| Setting                      | 5       | Describe the setting, locations, and relevant dates, including periods of recruitment, exposure, follow-up, and data collection<br>- Yes, found in pages 7 to 10 of the manuscript.                                                                                                                                                                                                                                                                                                                                                             |
| Participants                 | 6       | (a) <i>Cohort study</i> —Give the eligibility criteria, and the sources and methods of selection of participants. Describe methods of follow-up<br>- Eligibility criteria, and sources and methods of selection of participants are found in pages 7 and 8 of the manuscript<br><hr/> (b) <i>Cohort study</i> —For matched studies, give matching criteria and number of exposed and unexposed<br>- not relevant<br><i>Case-control study</i> —For matched studies, give matching criteria and the number of controls per case<br>-not relevant |
| Variables                    | 7       | Clearly define all outcomes, exposures, predictors, potential confounders, and effect modifiers. Give diagnostic criteria, if applicable<br>- Partly missing, but see page 10 to 13 for information about outcomes and predictors.                                                                                                                                                                                                                                                                                                              |
| Data sources/<br>measurement | 8*      | For each variable of interest, give sources of data and details of methods of assessment (measurement). Describe comparability of assessment methods if there is more than one group                                                                                                                                                                                                                                                                                                                                                            |
| Bias                         | 9       | Describe any efforts to address potential sources of bias<br>- Missing in the manuscript                                                                                                                                                                                                                                                                                                                                                                                                                                                        |
| Study size                   | 10      | Explain how the study size was arrived at<br>- Page 8 in the manuscript                                                                                                                                                                                                                                                                                                                                                                                                                                                                         |
| Quantitative variables       | 11      | Explain how quantitative variables were handled in the analyses. If applicable, describe which groupings were chosen and why<br>- Not relevant, since this is a study protocol article                                                                                                                                                                                                                                                                                                                                                          |

1  
2 Statistical methods

12

(a) Describe all statistical methods, including those used to control for confounding

- Missing in the manuscript

---

(b) Describe any methods used to examine subgroups and interactions

- Missing in the manuscript

---

(c) Explain how missing data were addressed

- Missing in the manuscript

---

(d) *Cohort study*—If applicable, explain how loss to follow-up was addressed

- Missing in the manuscript

*Case-control study*—If applicable, explain how matching of cases and controls was addressed

- not relevant

*Cross-sectional study*—If applicable, describe analytical methods taking account of sampling strategy

- not relevant

---

(e) Describe any sensitivity analyses

- missing

Continued on next page

3  
4  
5  
6  
7  
8  
9  
10  
11  
12  
13  
14  
15  
16  
17  
18  
19  
20  
21  
22  
23  
24  
25  
26  
27  
28  
29  
30  
31  
32  
33  
34  
35  
36  
37  
38  
39  
40  
41  
42  
43  
44  
45  
46  
47  
48  
49  
50  
51  
52  
53  
54  
55  
56  
57  
58  
59  
60

For peer review only

**Results**

|                   |     |                                                                                                                                                                                                                                |
|-------------------|-----|--------------------------------------------------------------------------------------------------------------------------------------------------------------------------------------------------------------------------------|
| Participants      | 13* | (a) Report numbers of individuals at each stage of study—eg numbers potentially eligible, examined for eligibility, confirmed eligible, included in the study, completing follow-up, and analysed<br>- not relevant            |
|                   |     | (b) Give reasons for non-participation at each stage<br>- not relevant                                                                                                                                                         |
|                   |     | (c) Consider use of a flow diagram<br>- not relevant                                                                                                                                                                           |
| Descriptive data  | 14* | (a) Give characteristics of study participants (eg demographic, clinical, social) and information on exposures and potential confounders<br>- Not relevant                                                                     |
|                   |     | (b) Indicate number of participants with missing data for each variable of interest<br>- Not relevant                                                                                                                          |
|                   |     | (c) <i>Cohort study</i> —Summarise follow-up time (eg, average and total amount)<br>- Not relevant                                                                                                                             |
| Outcome data      | 15* | <i>Cohort study</i> —Report numbers of outcome events or summary measures over time<br>- Not relevant                                                                                                                          |
|                   |     | <i>Case-control study</i> —Report numbers in each exposure category, or summary measures of exposure<br>- not relevant                                                                                                         |
|                   |     | <i>Cross-sectional study</i> —Report numbers of outcome events or summary measures<br>- not relevant                                                                                                                           |
| Main results      | 16  | (a) Give unadjusted estimates and, if applicable, confounder-adjusted estimates and their precision (eg, 95% confidence interval). Make clear which confounders were adjusted for and why they were included<br>- Not relevant |
|                   |     | (b) Report category boundaries when continuous variables were categorized<br>- Not relevant                                                                                                                                    |
|                   |     | (c) If relevant, consider translating estimates of relative risk into absolute risk for a meaningful time period<br>- Not relevant                                                                                             |
| Other analyses    | 17  | Report other analyses done—eg analyses of subgroups and interactions, and sensitivity analyses<br>- Not relevant.                                                                                                              |
| <b>Discussion</b> |     |                                                                                                                                                                                                                                |
| Key results       | 18  | Summarise key results with reference to study objectives<br>- not relevant                                                                                                                                                     |
| Limitations       | 19  | Discuss limitations of the study, taking into account sources of potential bias or imprecision. Discuss both direction and magnitude of any potential bias<br>-not relevant                                                    |
| Interpretation    | 20  | Give a cautious overall interpretation of results considering objectives, limitations, multiplicity of analyses, results from similar studies, and other relevant evidence<br>-not relevant                                    |
| Generalisability  | 21  | Discuss the generalisability (external validity) of the study results<br>- not relevant                                                                                                                                        |

**Other information**

---

Funding 22 Give the source of funding and the role of the funders for the present study and, if applicable, for the original study on which the present article is based  
- Yes, found in page 15 in the manuscript

\*Give information separately for cases and controls in case-control studies and, if applicable, for exposed and unexposed groups in cohort and cross-sectional studies.

**Note:** An Explanation and Elaboration article discusses each checklist item and gives methodological background and published examples of transparent reporting. The STROBE checklist is best used in conjunction with this article (freely available on the Web sites of PLoS Medicine at <http://www.plosmedicine.org/>, Annals of Internal Medicine at <http://www.annals.org/>, and Epidemiology at <http://www.epidem.com/>). Information on the STROBE Initiative is available at [www.strobe-statement.org](http://www.strobe-statement.org).
